# Supplementary material for: The length of coastlines in Ptolemy'sGeographyand in&#160;ancient&#160;periploi
Source: Copernicus journal article supplement (doi:10.5194/hgss-9-9-2018), 2018-02-01
Supplement: Supplementary file 1 [file CaspianSea.xls]

## Sheet: Ksi and Omega compared
Recension Ξ (including corrected values)				Recension Ω
latitude	longitude	Place name		latitude	longitude	Place name
				44	102	Aspabota*
				43	100	Oxos-Mündung
				42	97.5	Sokanda
				41.5	97.3333	Maxeras-Mündung
				40.5	94.75	Saramanne
				40.5	94	Grenzpunkt (Hyrkanien, Medien)
				40.5	93	Charindas-Mündung
				40	92	Mandagarsis
				40	90.3333	Straton-Mündung
				40.25	88.25	Akola
				40.6667	87.5	Amana
				41.5	86.5	Amardos-Mündung
				41.5	85.5	Kyropolis*
				42	84.6667	Charax der Kadusier
				42.25	84	Kyros-Mündung
				42.5	82.667	Tazeina
				42.5	82.5	Sabaeische Altaere
				42.75	81	Kambysos-Mündung
				43	80	Sannina
43.3333	79.75	Grenzpunkt (Gross-Armenien, Medien)		43.3333	79.75	Grenzpunkt (Gross-Armenien, Medien)
43.8333	79.75	Araxes-Mündung		43.8333	79.75	Araxes-Mündung
44.5	79.6667	Kyros-Mündung		44.5	79.6667	Kyros-Mündung
45	79.5	Gangara*		45	79.5	Gangara*
45.5	81	Albanos-Mündung		45.5	80.5	Albanos-Mündung
45.8333	81.6667	Albana*		45.8333	81.6667	Albana*
46	82.5	Kasios-Mündung		46	82.5	Kasios-Mündung
46.1667	83	Gelda		46.1667	83	Gelda
46.5	84.5	Gerrhos-Mündung		46.5	84.5	Gerrhos-Mündung
46.6667	85	Telaiba		46.6667	85	Telaiba
47	86	Soanas-Mündung		47	86	Soanas-Mündung
47.6667	86.5	Alontas-Mündung		47.6667	86.5	Alontas-Mündung
48.3333	87	Udon-Mündung		48.6667	87	Udon-Mündung
48.8333	87.5	Rha-Mündung		48.8333	87.5	Rha-Mündung
				48.25	94	Daix-Mündung
				48	97	Iaxartes-Mündung
				47.3333	100	Iastos-Mündung
				45.5	103	Polytimetos-Mündung

## Sheet: Ksi distances
From			To
longitude	latitude	Place name	longitude	latitude	Place name	Distance
102	44	Aspabota*	100	43	Oxos-Mündung	880.962
100	43	Oxos-Mündung	97.5	42	Sokanda	1048.43
97.5	42	Sokanda	97.3333	41.5	Maxeras-Mündung	257.614
97.3333	41.5	Maxeras-Mündung	94.75	40.5	Saramanne	1095.51
94.75	40.5	Saramanne	94	40.5	Grenzpunkt (Hyrkanien, Medien)	285.151
94	40.5	Grenzpunkt (Hyrkanien, Medien)	93	40.5	Charindas-Mündung	380.201
93	40.5	Charindas-Mündung	92	40	Mandagarsis	456.209
92	40	Mandagarsis	90.3333	40	Straton-Mündung	638.361
90.3333	40	Straton-Mündung	88.25	40.25	Akola	806.229
88.25	40.25	Akola	87.5	40.6667	Amana	353.29
87.5	40.6667	Amana	86.5	41.5	Amardos-Mündung	561.817
86.5	41.5	Amardos-Mündung	85.5	41.5	Kyropolis*	374.476
85.5	41.5	Kyropolis*	84.6667	42	Charax der Kadusier	398.91
84.6667	42	Charax der Kadusier	84	42.25	Kyros-Mündung	277.031
84	42.25	Kyros-Mündung	82.667	42.5	Tazeina	507.99
82.667	42.5	Tazeina	82.5	42.5	Sabaeische Altaere	61.5626
82.5	42.5	Sabaeische Altaere	81	42.75	Kambysos-Mündung	565.823
81	42.75	Kambysos-Mündung	80	43	Sannina	387.151
80	43	Sannina	79.75	43.3333	Grenzpunkt (Gross-Armenien, Medien)	189.973
79.75	43.3333	Grenzpunkt (Gross-Armenien, Medien)	79.75	43.8333	Araxes-Mündung	250
79.75	43.8333	Araxes-Mündung	79.6667	44.5	Kyros-Mündung	334.671
79.6667	44.5	Kyros-Mündung	79.5	45	Gangara*	256.909
79.5	45	Gangara*	81	45.5	Albanos-Mündung	584.192
81	45.5	Albanos-Mündung	81.6667	45.8333	Albana*	286.426
81.6667	45.8333	Albana*	82.5	46	Kasios-Mündung	301.615
82.5	46	Kasios-Mündung	83	46.1667	Gelda	192.387
83	46.1667	Gelda	84.5	46.5	Gerrhos-Mündung	543.996
84.5	46.5	Gerrhos-Mündung	85	46.6667	Telaiba	190.966
85	46.6667	Telaiba	86	47	Soanas-Mündung	380.501
86	47	Soanas-Mündung	86.5	47.6667	Alontas-Mündung	373.921
86.5	47.6667	Alontas-Mündung	87	48.3333	Udon-Mündung	372.952
87	48.3333	Udon-Mündung	87.5	48.8333	Rha-Mündung	299.751
87.5	48.8333	Rha-Mündung	94	48.25	Daix-Mündung	2170.73
94	48.25	Daix-Mündung	97	48	Iaxartes-Mündung	1008.97
97	48	Iaxartes-Mündung	100	47.3333	Iastos-Mündung	1063.66
100	47.3333	Iastos-Mündung	103	45.5	Polytimetos-Mündung	1381.72
103	45.5	Polytimetos-Mündung	102	44	Aspabota*	829.796
						20349.9

## Sheet: Omega distances
From			To
longitude	latitude	Place name	longitude	latitude	Place name	Distance
102	44	Aspabota*	100	43	Oxos-Mündung	880.962
100	43	Oxos-Mündung	97.5	42	Sokanda	1048.43
97.5	42	Sokanda	97.3333	41.5	Maxeras-Mündung	257.614
97.3333	41.5	Maxeras-Mündung	94.75	40.5	Saramanne	1095.51
94.75	40.5	Saramanne	94	40.5	Grenzpunkt (Hyrkanien, Medien)	285.151
94	40.5	Grenzpunkt (Hyrkanien, Medien)	93	40.5	Charindas-Mündung	380.201
93	40.5	Charindas-Mündung	92	40	Mandagarsis	456.209
92	40	Mandagarsis	90.3333	40	Straton-Mündung	638.361
90.3333	40	Straton-Mündung	88.25	40.25	Akola	806.229
88.25	40.25	Akola	87.5	40.6667	Amana	353.29
87.5	40.6667	Amana	86.5	41.5	Amardos-Mündung	561.817
86.5	41.5	Amardos-Mündung	85.5	41.5	Kyropolis*	374.476
85.5	41.5	Kyropolis*	84.6667	42	Charax der Kadusier	398.91
84.6667	42	Charax der Kadusier	84	42.25	Kyros-Mündung	277.031
84	42.25	Kyros-Mündung	82.667	42.5	Tazeina	507.99
82.667	42.5	Tazeina	82.5	42.5	Sabaeische Altaere	61.5626
82.5	42.5	Sabaeische Altaere	81	42.75	Kambysos-Mündung	565.823
81	42.75	Kambysos-Mündung	80	43	Sannina	387.151
80	43	Sannina	79.75	43.3333	Grenzpunkt (Gross-Armenien, Medien)	189.973
79.75	43.3333	Grenzpunkt (Gross-Armenien, Medien)	79.75	43.8333	Araxes-Mündung	250
79.75	43.8333	Araxes-Mündung	79.6667	44.5	Kyros-Mündung	334.671
79.6667	44.5	Kyros-Mündung	79.5	45	Gangara*	256.909
79.5	45	Gangara*	80.5	45.5	Albanos-Mündung	431.746
80.5	45.5	Albanos-Mündung	81.6667	45.8333	Albana*	440.401
81.6667	45.8333	Albana*	82.5	46	Kasios-Mündung	301.615
82.5	46	Kasios-Mündung	83	46.1667	Gelda	192.387
83	46.1667	Gelda	84.5	46.5	Gerrhos-Mündung	543.996
84.5	46.5	Gerrhos-Mündung	85	46.6667	Telaiba	190.966
85	46.6667	Telaiba	86	47	Soanas-Mündung	380.501
86	47	Soanas-Mündung	86.5	47.6667	Alontas-Mündung	373.921
86.5	47.6667	Alontas-Mündung	87	48.6667	Udon-Mündung	527.067
87	48.6667	Udon-Mündung	87.5	48.8333	Rha-Mündung	184.703
87.5	48.8333	Rha-Mündung	94	48.25	Daix-Mündung	2170.73
94	48.25	Daix-Mündung	97	48	Iaxartes-Mündung	1008.97
97	48	Iaxartes-Mündung	100	47.3333	Iastos-Mündung	1063.66
100	47.3333	Iastos-Mündung	103	45.5	Polytimetos-Mündung	1381.72
103	45.5	Polytimetos-Mündung	102	44	Aspabota*	829.796
						20390.4
