# Supplementary material for: The length of coastlines in Ptolemy'sGeographyand in&#160;ancient&#160;periploi
Source: Copernicus journal article supplement (doi:10.5194/hgss-9-9-2018), 2018-02-01
Supplement: Supplementary file 1 [file hgss-9-9-2018-supplement.zip]

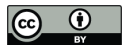

## *Supplement of*

# **The length of coastlines in Ptolemy's *Geography* and in ancient *periploi***

**D. A. Shcheglov**

*Correspondence to:* Dmitry A. Shcheglov ([shcheglov@yandex.ru](mailto:shcheglov@yandex.ru))

- [hgss-9-9-2018-supplement-title-page.pdf](#)
- [CaspianSea.xls](#)
- [IndianOcean.xls](#)
- [Islands.xls](#)
- [Mediterranean.xls](#)

The copyright of individual parts of the supplement might differ from the CC BY 4.0 License.
