# Supplementary material for: The length of coastlines in Ptolemy'sGeographyand in&#160;ancient&#160;periploi
Source: Copernicus journal article supplement (doi:10.5194/hgss-9-9-2018), 2018-02-01
Supplement: Supplementary file 2 [file IndianOcean.xls]

## Sheet: Ksi and Omega compared
Ξ data сlearly corrupted due to scribal errors					Recension Ξ (including corrected values)				Recension Ω
latitude	longitude	Place name			latitude	longitude	Place name		latitude	longitude	Place name
									23.6667	94	Kap Harmozon
									23.5	94.5	Harmuza*
									24.5	95.6667	Saganos-Mündung
									25	96	Andanis-Mündung
									26	96.6667	Achindanas-Mündung
									26	96	Korios-Mündung
									27.6667	95.5	Kathraps-Mündung
									28.6667	95.25	Daras-Mündung
									29.25	94	Bagradas-Mündung
									29.3333	93	Ausinza
									29.6667	92	Brisoanas-Mündung
									29.75	90	Ionaka
									29.5	89.6667	Kap Chersonesos
									30	88.5	Rhogomanis-Mündung
									30.1667	87.5	Kap Taoke
									30.5	86.5	Oroatis-Mündung
									30.5	84.5	Sandige Lagune
									30.6667	84.5	Eulaios-Mündung
									31	83	Schlammbucht
									30.6667	82	Mosaios-Mündung
									31	81.6667	Charax des Pasines
									31	80.5	Tigris-Mündung (östliche)
									30.25	79.5	Tigris-Mündung (westliche)
									30.1667	79	Maisanitischer Golf
									29.25	79	Iokura
									29	79	Grenzpunkt (Arabia Deserta, Arabia Felix)
									28.75	79	Koromanis
									28.25	79.25	Heiliger Golf
									27.6667	79.25	Stadt des Adaros
									27.3333	79.6667	Itamos
									27	79.75	Golf Laianites
									26.5	80.3333	Kap Chersonesos
									26.1667	80.1667	Mallada
									25.6667	80	Istriana
									25.3333	80	Golf der Mager
									25	80	Ithar
									24.1667	80	Bilbana
									23.3333	80	Gerra*
									23.333	81	Magindanata
									23.25	82	Atta
									23.5	83.6667	Karada
									23	84.25	Sarkoe
									23	85	Kauana
									23.1667	86	Kapsina
									23.5	86.5	Lar-Mündung
									23.5	87.3333	Heiliges Kap des Helios
									23.1667	88	Rhegama
									23.3333	92.5	Kap Asabon
									22	93	Schwarze Berge (Endpunkt am Meer)
									21.5	92.6667	Kryptos
									20.25	93	Kap Korodamon
									20.25	92.333	Abissa
									20	91.6667	Orakel der Artemis
									20	91	Koseude
									19.3333	90.25	Didyma-Berge
									20.1667	89.5	Ormanos-Mündung
									19	89	Neogilla
									18.5	88.5	Astoa
									17.5	87.5	Ange
									16.75	87.3333	Ausara
									16	88	Metakon
									14	90	Kap Syagros
									14	88.5	Moscha
									14	87	Thialemath
									13.75	86.3333	Tretos
									13.5	85.5	Embolon
									13.5	85	Prion-Mündung
									13	84.6667	Prionoton
									13	84.3333	Maithath
									12.6667	84	Trulla
									12.5	84	&quot;Kane* &quot;
									11.5	83.6667	Kleiner Strand
									11.75	83.5	Eristhe
									11.5	82.5	Grosser Strand
									11.75	82	Abisama
									11.75	81.5	Schwarzer Berg
									11.75	80.6667	Agmanisphe
									11.5	80	Arabia*
									11.5	79.3333	Kap des Ammonios
									11.5	78.6667	Lees
									11.75	78	Mardache / Marache
									11.75	77	Madoke
									11.25	76.25	Kabubathra
									11.5	75.5	Sanina
									11.5	75	Kap Poseidion
									11.6667	74.5	Kap Palindromos
									12	75	Okelis*
									12.5	75	Pseudokelis
									13	74.75	Hafen des Sosipos
									14	74.5	Muza*
									14.5	74.25	Sakatia
									15	73.5	Dorf des Napeges
									16.5	73.5	Dorf des Ailos
									16.5	72.5	Stadt des Pudnos*
									17.1667	72.25	Dorf des Adedos
									18.1667	71.75	Mamala
									19.5	70.6667	Ambe
									20.25	70	Badeo*
									20.6667	69.5	Baitios-Mündung –&gt; 6,7,5
									21	69.6667	Thebai
									21.5	69.333	Kentos / Kantosi
									22	69.3333	Zabram
									22.667	69	Arga / Agar
									23.25	68.5	Kopar
									24	68	Iambia
									25.6667	67	Kap Chersonesos
									25.6667	67.25	Dorf des Rhaunathos
									26.3333	67.3333	Dorf der Phoiniker
									26.6667	67	Hippos
									27.3333	66.5	Hippos–&gt; 6,7,2
									27.75	66.6667	Modiana
									28.6667	66.3333	Onne
									29	66	Elanitischer Golf (Biegung)
									29.25	65.6667	Elana
									28.5	65	Kap bei Pharan
					29.8333	63.5	Zipfel des Arabischen Golfes		29.8333	63.5	Zipfel des Arabischen Golfes
					29.1667	63.3333	Arsinoe		29.1667	63.3333	Arsinoe
					28.8333	63.3333	Klysma		28.8333	63.3333	Klysma
					27.8333	64	Kap Drepanon		27.8333	64	Kap Drepanon
					27.5	64.0833	Myos Hormos*		27.5	64.5	Myos Hormos*
					26.75	64.25	Philoteras		26.75	64.25	Philoteras
					26.1667	64.3333	Aias-Berg		26.5	64.3333	Aias-Berg
					26	64.5	Leukos Limen		26	64.5	Leukos Limen
					25.75	64.5	Akabe-Berg		25.75	64.5	Akabe-Berg
					25.5	64.5	Nechesia		25.5	64.5	Nechesia
					25	64.8333	Smaragdos-Berg		25	64.8333	Smaragdos-Berg
					24.6667	64.6667	Lepte Akra		24.6667	64.6667	Lepte Akra
					23.8333	64.0833	Berenike*		23.8333	64.0833	Berenike*
					23.5	64.75	Pentadaktylon-Berg		23.5	64.75	Pentadaktylon-Berg
					23	65	Kap Bazion		23	65	Kap Bazion
					22.5	65	Prionoton-Berg		22.5	65	Prionoton-Berg
					22	65	Chersonesos		22	65	Chersonesos
					21.5	65.5	Kap Mnemeion		21.5	65.1667	Kap Mnemeion
					21.3333	65.5	Ision-Berg		21.3333	65.5	Ision-Berg
					21.1667	65	Tiefer Hafen		21	65	Tiefer Hafen
					21	65	Hafen der Dioskuren		20.5	65	Hafen der Dioskuren
					20.25	65.3333	Warte der Demeter		20.25	65.6667	Warte der Demeter
					19.75	65.5	Kap Aspis		19.75	65.5	Kap Aspis
					19.6667	65.6667	Kap Diogenes		19.6667	65.6667	Kap Diogenes
					19	65.6667	Satyron-Berg		19	65.6667	Satyron-Berg
					18.5	65.5	Monodaktylon-Berg		18.5	65.5	Monodaktylon-Berg
					18	65.6667	Gauron-Berg		18	65.6667	Gauron-Berg
					17.5	65.5	Hafen der Rettenden Götter		17.5	65.5	Hafen der Rettenden Götter
					17	65.75	Euangeloi-Hafen		17	65.75	Euangeloi-Hafen
					16.5	66	Ptolemais Theron*		16.4167	66	Ptolemais Theron*
16.5	66.5	Altar des Eros			16	65.5	Sabastrikon-Mündung		16	65.5	Sabastrikon-Mündung
15	67	Sabastrikon-Mündung			15	67	Altar des Eros		15	67	Altar des Eros
					14.25	66	Grosser Strand		14.25	66	Grosser Strand
					13.6667	68	Kolobon-Berg		13.6667	68	Kolobon-Berg
					13	68	Sabat		12.5	68.3333	Sabat
					12.5	68	Bergige Chersonesos		12.1667	68	Bergige Chersonesos
					11.6667	67	Adulis*		11.3333	67	Adulis*
					11.6667	68	Kap Kronos		11.6667	68	Kap Kronos
					10.25	72	Antiochos-Kanal		10.25	72	Antiochos-Kanal
					10.3333	72.25	Mandaïth		10.3333	73	Mandaïth
					10.6667	73.75	Arsinoe		10.6667	73.75	Arsinoe
					11	74.5	Dere*		11	74.5	Dere*

## Sheet: Ksi distances
From			To
longitude	latitude	Place name	longitude	latitude	Place name	Distance
63.5	29.8333	Zipfel des Arabischen Golfes	63.3333	29.1667	Arsinoe	341.133
63.3333	29.1667	Arsinoe	63.3333	28.8333	Klysma	166.667
63.3333	28.8333	Klysma	64	27.8333	Kap Drepanon	579.724
64	27.8333	Kap Drepanon	64.0833	27.5	Myos Hormos*	170.703
64.0833	27.5	Myos Hormos*	64.25	26.75	Philoteras	382.264
64.25	26.75	Philoteras	64.3333	26.1667	Aias-Berg	294.042
64.3333	26.1667	Aias-Berg	64.5	26	Leukos Limen	112.011
64.5	26	Leukos Limen	64.5	25.75	Akabe-Berg	125
64.5	25.75	Akabe-Berg	64.5	25.5	Nechesia	125
64.5	25.5	Nechesia	64.8333	25	Smaragdos-Berg	291.93
64.8333	25	Smaragdos-Berg	64.6667	24.6667	Lepte Akra	183.023
64.6667	24.6667	Lepte Akra	64.0833	23.8333	Berenike*	494.296
64.0833	23.8333	Berenike*	64.75	23.5	Pentadaktylon-Berg	347.828
64.75	23.5	Pentadaktylon-Berg	65	23	Kap Bazion	275.118
65	23	Kap Bazion	65	22.5	Prionoton-Berg	250
65	22.5	Prionoton-Berg	65	22	Chersonesos	250
65	22	Chersonesos	65.5	21.5	Kap Mnemeion	341.2
65.5	21.5	Kap Mnemeion	65.5	21.3333	Ision-Berg	83.3333
65.5	21.3333	Ision-Berg	65	21.1667	Tiefer Hafen	247.456
65	21.1667	Tiefer Hafen	65	21	Hafen der Dioskuren	83.3333
65	21	Hafen der Dioskuren	65.3333	20.25	Warte der Demeter	406.147
65.3333	20.25	Warte der Demeter	65.5	19.75	Kap Aspis	261.977
65.5	19.75	Kap Aspis	65.6667	19.6667	Kap Diogenes	88.8301
65.6667	19.6667	Kap Diogenes	65.6667	19	Satyron-Berg	333.333
65.6667	19	Satyron-Berg	65.5	18.5	Monodaktylon-Berg	262.158
65.5	18.5	Monodaktylon-Berg	65.6667	18	Gauron-Berg	262.228
65.6667	18	Gauron-Berg	65.5	17.5	Hafen der Rettenden Götter	262.296
65.5	17.5	Hafen der Rettenden Götter	65.75	17	Euangeloi-Hafen	277.039
65.75	17	Euangeloi-Hafen	66	16.5	Ptolemais Theron*	277.177
66	16.5	Ptolemais Theron*	65.5	16	Sabastrikon-Mündung	346.562
65.5	16	Sabastrikon-Mündung	67	15	Altar des Eros	878.812
67	15	Altar des Eros	66	14.25	Grosser Strand	612.113
66	14.25	Grosser Strand	68	13.6667	Kolobon-Berg	1013.35
68	13.6667	Kolobon-Berg	68	13	Sabat	333.333
68	13	Sabat	68	12.5	Bergige Chersonesos	250
68	12.5	Bergige Chersonesos	67	11.6667	Adulis*	642.379
67	11.6667	Adulis*	68	11.6667	Kap Kronos	489.67
68	11.6667	Kap Kronos	72	10.25	Antiochos-Kanal	2087.32
72	10.25	Antiochos-Kanal	72.25	10.3333	Mandaïth	129.855
72.25	10.3333	Mandaïth	73.75	10.6667	Arsinoe	756.039
73.75	10.6667	Arsinoe	74.5	11	Dere*	404.27
						15518.9

## Sheet: Omega distances
From			To
longitude	latitude	Place name	longitude	latitude	Place name	Distance
23.6667	94	Kap Harmozon	23.5	94.5	Harmuza*	250.076
23.5	94.5	Harmuza*	24.5	95.6667	Saganos-Mündung	584.991
24.5	95.6667	Saganos-Mündung	25	96	Andanis-Mündung	168.591
25	96	Andanis-Mündung	26	96.6667	Achindanas-Mündung	337.853
26	96.6667	Achindanas-Mündung	26	96	Korios-Mündung	333.333
26	96	Korios-Mündung	27.6667	95.5	Kathraps-Mündung	263.547
27.6667	95.5	Kathraps-Mündung	28.6667	95.25	Daras-Mündung	133.482
28.6667	95.25	Daras-Mündung	29.25	94	Bagradas-Mündung	625.434
29.25	94	Bagradas-Mündung	29.3333	93	Ausinza	500.006
29.3333	93	Ausinza	29.6667	92	Brisoanas-Mündung	500.051
29.6667	92	Brisoanas-Mündung	29.75	90	Ionaka	1000
29.75	90	Ionaka	29.5	89.6667	Kap Chersonesos	166.667
29.5	89.6667	Kap Chersonesos	30	88.5	Rhogomanis-Mündung	583.341
30	88.5	Rhogomanis-Mündung	30.1667	87.5	Kap Taoke	500.008
30.1667	87.5	Kap Taoke	30.5	86.5	Oroatis-Mündung	500.074
30.5	86.5	Oroatis-Mündung	30.5	84.5	Sandige Lagune	1000
30.5	84.5	Sandige Lagune	30.6667	84.5	Eulaios-Mündung	7.98714
30.6667	84.5	Eulaios-Mündung	31	83	Schlammbucht	750.216
31	83	Schlammbucht	30.6667	82	Mosaios-Mündung	500.471
30.6667	82	Mosaios-Mündung	31	81.6667	Charax des Pasines	168.339
31	81.6667	Charax des Pasines	31	80.5	Tigris-Mündung (östliche)	583.333
31	80.5	Tigris-Mündung (östliche)	30.25	79.5	Tigris-Mündung (westliche)	504.212
30.25	79.5	Tigris-Mündung (westliche)	30.1667	79	Maisanitischer Golf	250.121
30.1667	79	Maisanitischer Golf	29.25	79	Iokura	87.4532
29.25	79	Iokura	29	79	Grenzpunkt (Arabia Deserta, Arabia Felix)	23.8511
29	79	Grenzpunkt (Arabia Deserta, Arabia Felix)	28.75	79	Koromanis	23.8511
28.75	79	Koromanis	28.25	79.25	Heiliger Golf	133.602
28.25	79.25	Heiliger Golf	27.6667	79.25	Stadt des Adaros	54.4026
27.6667	79.25	Stadt des Adaros	27.3333	79.6667	Itamos	210.552
27.3333	79.6667	Itamos	27	79.75	Golf Laianites	51.2126
27	79.75	Golf Laianites	26.5	80.3333	Kap Chersonesos	294.851
26.5	80.3333	Kap Chersonesos	26.1667	80.1667	Mallada	87.9831
26.1667	80.1667	Mallada	25.6667	80	Istriana	93.7974
25.6667	80	Istriana	25.3333	80	Golf der Mager	28.9413
25.3333	80	Golf der Mager	25	80	Ithar	28.9413
25	80	Ithar	24.1667	80	Bilbana	72.3528
24.1667	80	Bilbana	23.3333	80	Gerra*	72.3528
23.3333	80	Gerra*	23.333	81	Magindanata	500
23.333	81	Magindanata	23.25	82	Atta	500.037
23.25	82	Atta	23.5	83.6667	Karada	833.477
23.5	83.6667	Karada	23	84.25	Sarkoe	292.848
23	84.25	Sarkoe	23	85	Kauana	375
23	85	Kauana	23.1667	86	Kapsina	500.042
23.1667	86	Kapsina	23.5	86.5	Lar-Mündung	250.236
23.5	86.5	Lar-Mündung	23.5	87.3333	Heiliges Kap des Helios	416.667
23.5	87.3333	Heiliges Kap des Helios	23.1667	88	Rhegama	333.401
23.1667	88	Rhegama	23.3333	92.5	Kap Asabon	2250
23.3333	92.5	Kap Asabon	22	93	Schwarze Berge (Endpunkt am Meer)	252.021
22	93	Schwarze Berge (Endpunkt am Meer)	21.5	92.6667	Kryptos	167.123
21.5	92.6667	Kryptos	20.25	93	Kap Korodamon	169.496
20.25	93	Kap Korodamon	20.25	92.333	Abissa	333.5
20.25	92.333	Abissa	20	91.6667	Orakel der Artemis	333.194
20	91.6667	Orakel der Artemis	20	91	Koseude	333.333
20	91	Koseude	19.3333	90.25	Didyma-Berge	375.011
19.3333	90.25	Didyma-Berge	20.1667	89.5	Ormanos-Mündung	374.991
20.1667	89.5	Ormanos-Mündung	19	89	Neogilla	250.104
19	89	Neogilla	18.5	88.5	Astoa	250.057
18.5	88.5	Astoa	17.5	87.5	Ange	500.285
17.5	87.5	Ange	16.75	87.3333	Ausara	85.0284
16.75	87.3333	Ausara	16	88	Metakon	333.676
16	88	Metakon	14	90	Kap Syagros	1000
14	90	Kap Syagros	14	88.5	Moscha	750
14	88.5	Moscha	14	87	Thialemath	750
14	87	Thialemath	13.75	86.3333	Tretos	333.412
13.75	86.3333	Tretos	13.5	85.5	Embolon	416.761
13.5	85.5	Embolon	13.5	85	Prion-Mündung	250
13.5	85	Prion-Mündung	13	84.6667	Prionoton	168.179
13	84.6667	Prionoton	13	84.3333	Maithath	166.667
13	84.3333	Maithath	12.6667	84	Trulla	167.525
12.6667	84	Trulla	12.5	84	&quot;Kane* &quot;	8.7107
12.5	84	&quot;Kane* &quot;	11.5	83.6667	Kleiner Strand	175.101
11.5	83.6667	Kleiner Strand	11.75	83.5	Eristhe	84.4959
11.75	83.5	Eristhe	11.5	82.5	Grosser Strand	500.231
11.5	82.5	Grosser Strand	11.75	82	Abisama	250.567
11.75	82	Abisama	11.75	81.5	Schwarzer Berg	250
11.75	81.5	Schwarzer Berg	11.75	80.6667	Agmanisphe	416.667
11.75	80.6667	Agmanisphe	11.5	80	Arabia*	333.993
11.5	80	Arabia*	11.5	79.3333	Kap des Ammonios	333.333
11.5	79.3333	Kap des Ammonios	11.5	78.6667	Lees	333.333
11.5	78.6667	Lees	11.75	78	Mardache / Marache	334.29
11.75	78	Mardache / Marache	11.75	77	Madoke	500
11.75	77	Madoke	11.25	76.25	Kabubathra	379.43
11.25	76.25	Kabubathra	11.5	75.5	Sanina	376.238
11.5	75.5	Sanina	11.5	75	Kap Poseidion	250
11.5	75	Kap Poseidion	11.6667	74.5	Kap Palindromos	250.959
11.6667	74.5	Kap Palindromos	12	75	Okelis*	253.814
12	75	Okelis*	12.5	75	Pseudokelis	64.7046
12.5	75	Pseudokelis	13	74.75	Hafen des Sosipos	140.996
13	74.75	Hafen des Sosipos	14	74.5	Muza*	182.202
14	74.5	Muza*	14.5	74.25	Sakatia	141.981
14.5	74.25	Sakatia	15	73.5	Dorf des Napeges	381.37
15	73.5	Dorf des Napeges	16.5	73.5	Dorf des Ailos	213.006
16.5	73.5	Dorf des Ailos	16.5	72.5	Stadt des Pudnos*	500
16.5	72.5	Stadt des Pudnos*	17.1667	72.25	Dorf des Adedos	160.658
17.1667	72.25	Dorf des Adedos	18.1667	71.75	Mamala	293.884
18.1667	71.75	Mamala	19.5	70.6667	Ambe	582.651
19.5	70.6667	Ambe	20.25	70	Badeo*	356.419
20.25	70	Badeo*	20.6667	69.5	Baitios-Mündung –&gt; 6,7,5	260.19
20.6667	69.5	Baitios-Mündung –&gt; 6,7,5	21	69.6667	Thebai	101.611
21	69.6667	Thebai	21.5	69.333	Kentos / Kantosi	188.41
21.5	69.333	Kentos / Kantosi	22	69.3333	Zabram	88.2332
22	69.3333	Zabram	22.667	69	Arga / Agar	204.56
22.667	69	Arga / Agar	23.25	68.5	Kopar	271.405
23.25	68.5	Kopar	24	68	Iambia	286.019
24	68	Iambia	25.6667	67	Kap Chersonesos	592.997
25.6667	67	Kap Chersonesos	25.6667	67.25	Dorf des Rhaunathos	125
25.6667	67.25	Dorf des Rhaunathos	26.3333	67.3333	Dorf der Phoiniker	135.257
26.3333	67.3333	Dorf der Phoiniker	26.6667	67	Hippos	178.775
26.6667	67	Hippos	27.3333	66.5	Hippos–&gt; 6,7,2	282.509
27.3333	66.5	Hippos–&gt; 6,7,2	27.75	66.6667	Modiana	117.47
27.75	66.6667	Modiana	28.6667	66.3333	Onne	247.339
28.6667	66.3333	Onne	29	66	Elanitischer Golf (Biegung)	179.758
29	66	Elanitischer Golf (Biegung)	29.25	65.6667	Elana	174.346
29.25	65.6667	Elana	28.5	65	Kap bei Pharan	368.238
28.5	65	Kap bei Pharan	29.8333	63.5	Zipfel des Arabischen Golfes	803.938
29.8333	63.5	Zipfel des Arabischen Golfes	29.1667	63.3333	Arsinoe	170.864
29.1667	63.3333	Arsinoe	28.8333	63.3333	Klysma	74.7998
28.8333	63.3333	Klysma	27.8333	64	Kap Drepanon	400.37
27.8333	64	Kap Drepanon	27.5	64.5	Myos Hormos*	260.274
27.5	64.5	Myos Hormos*	26.75	64.25	Philoteras	204.759
26.75	64.25	Philoteras	26.5	64.3333	Aias-Berg	68.3836
26.5	64.3333	Aias-Berg	26	64.5	Leukos Limen	136.377
26	64.5	Leukos Limen	25.75	64.5	Akabe-Berg	53.8139
25.75	64.5	Akabe-Berg	25.5	64.5	Nechesia	53.8139
25.5	64.5	Nechesia	25	64.8333	Smaragdos-Berg	198.04
25	64.8333	Smaragdos-Berg	24.6667	64.6667	Lepte Akra	109.539
24.6667	64.6667	Lepte Akra	23.8333	64.0833	Berenike*	342.837
23.8333	64.0833	Berenike*	23.5	64.75	Pentadaktylon-Berg	341.013
23.5	64.75	Pentadaktylon-Berg	23	65	Kap Bazion	163.988
23	65	Kap Bazion	22.5	65	Prionoton-Berg	105.654
22.5	65	Prionoton-Berg	22	65	Chersonesos	105.654
22	65	Chersonesos	21.5	65.1667	Kap Mnemeion	134.304
21.5	65.1667	Kap Mnemeion	21.3333	65.5	Ision-Berg	170.256
21.3333	65.5	Ision-Berg	21	65	Tiefer Hafen	259.554
21	65	Tiefer Hafen	20.5	65	Hafen der Dioskuren	105.654
20.5	65	Hafen der Dioskuren	20.25	65.6667	Warte der Demeter	337.39
20.25	65.6667	Warte der Demeter	19.75	65.5	Kap Aspis	132.755
19.75	65.5	Kap Aspis	19.6667	65.6667	Kap Diogenes	85.0946
19.6667	65.6667	Kap Diogenes	19	65.6667	Satyron-Berg	137.348
19	65.6667	Satyron-Berg	18.5	65.5	Monodaktylon-Berg	132.755
18.5	65.5	Monodaktylon-Berg	18	65.6667	Gauron-Berg	132.755
18	65.6667	Gauron-Berg	17.5	65.5	Hafen der Rettenden Götter	132.755
17.5	65.5	Hafen der Rettenden Götter	17	65.75	Euangeloi-Hafen	162.081
17	65.75	Euangeloi-Hafen	16.4167	66	Ptolemais Theron*	172.731
16.4167	66	Ptolemais Theron*	16	65.5	Sabastrikon-Mündung	264.236
16	65.5	Sabastrikon-Mündung	15	67	Altar des Eros	776.539
15	67	Altar des Eros	14.25	66	Grosser Strand	521.871
14.25	66	Grosser Strand	13.6667	68	Kolobon-Berg	1006.46
13.6667	68	Kolobon-Berg	12.5	68.3333	Sabat	273.568
12.5	68.3333	Sabat	12.1667	68	Bergige Chersonesos	177.819
12.1667	68	Bergige Chersonesos	11.3333	67	Adulis*	524.798
11.3333	67	Adulis*	11.6667	68	Kap Kronos	504.05
11.6667	68	Kap Kronos	10.25	72	Antiochos-Kanal	2014.48
10.25	72	Antiochos-Kanal	10.3333	73	Mandaïth	500.157
10.3333	73	Mandaïth	10.6667	73.75	Arsinoe	378.018
10.6667	73.75	Arsinoe	11	74.5	Dere*	377.76
