# Supplementary material for: The length of coastlines in Ptolemy'sGeographyand in&#160;ancient&#160;periploi
Source: Copernicus journal article supplement (doi:10.5194/hgss-9-9-2018), 2018-02-01
Supplement: Supplementary file 3 [file Islands.xls]

## Sheet: Ksi and Omega compared
Recension Ξ				Recension Ω
longitude	latitude	Place name		longitude	latitude	Place name
CORSICA
31.3333	40.3333	Diana-Hafen		31.3333	40.3333	Diana-Hafen
31.5	40.1667	Rhotanus-Mündung		31.5	40.1667	Rhotanus-Mündung
31.5	40.0833	Aleria*		31.5	40.0833	Aleria*
31.5	40	Heiliger Fluss (Mündung)		31.5	40	Heiliger Fluss (Mündung)
31.5	39.9167	Philonius-Hafen		31.75	39.9167	Philonius-Hafen
31.3333	39.75	Alista		31.3333	39.75	Alista
31.5	39.6667	Kap Granianum		31.5833	39.6667	Kap Granianum
31.3333	39.5	Rubra		31.4167	39.5833	Rubra
31.3333	39.4167	Syrakusanischer Hafen		31.4167	39.4167	Syrakusanischer Hafen
31.3333	39.3333	Palla		31.3333	39.3333	Palla
31	39.25	Kap Marianum		30.8333	39.1667	Kap Marianum
30.75	39.3333	Pitanus-Mündung		30.25	39.3333	Pitanus-Mündung
30.5	39.5	Ficaria		30.5	39.5	Fisera / Ficaria
30.3333	39.5833	Titianischer Hafen		30.1667	39.5833	Titianischer Hafen
30.25	39.6667	Ticarius-Mündung		30.25	39.6667	Ticarius-Mündung
30.25	39.75	Pauca		30.25	39.75	Pauca
30.1667	39.9167	Locra-Mündung		30.1667	39.9167	Locra-Mündung
30.25	40	Sand-Küste		30.25	40	Sand-Küste
30.1667	40.1667	Urcinium		30.1667	40.1667	Urcinium
30	40.25	Kap Rhium		30	40.25	Kap Rhium
30	40.3333	Rhoetium		30	40.3333	Rhoetium
30.1667	40.4167	Circidius-Mündung		30	40.4167	Circidius-Mündung
30.1667	40.5	Kap Viriballum		30	40.5	Kap Viriballum
30.25	40.4167	Casalus-Bucht		30.25	40.4167	Casalus-Bucht
30	41.6667	Kap Cattius		30	41.1667	Kap Attius
30	41	Caesia-Strand		30	41.5	Kap Tilox
30.5	41.1667	Kap Tilox		30.5	41.1667	Caesia-Strand
30.6667	41	Vilerius-Mündung		30.67	41	Volerius M,
31	41.3333	Cenelata		31	41.0833	Canelata
31.25	41.5	Centurinum		31.25	41.5	Centurinum
31.5	41.5	Heiliges Kap		31.5833	41.5	Heiliges Kap
31.3333	41.1667	Clunium		31.3333	41.1667	Clunium
31.3333	41	Mantinum		31.3333	41	Mantinum
31.5	40.75	Kap Avagum		31.58	40.75	Kap Vagum
31.3333	40.6667	Mariana*		31.3333	40.6667	Mariana*
31.5	40.5833	Tavola-Mündung		31.5	40.58	Tuola-Mündung
31.5	40.5	Altar der Tutela		31.5	40.5	Altar der Tutela
SARDINIA
31.25	35.8333	Sulci		30.75	35.8333	Sulci* (Ksi)
30.75	35.8333	Sulci*		30.6667	36	Breites Kap
30.5833	35.8333	Pupulum		30.6667	36.5	Neapolis
30.6667	36	Breites Kap		30.5	36.3333	Heiligtum des Sardus Pater
30.6667	36.1667	Neapolis		30.5	36.5	Osaea
30.5	36.3333	Heiligtum des Sardus Pater		30.5	36.6667	Heiliger Fluss (Mündung)
30.5	36.6667	Heiliger Fluss (Mündung)		30.5	36.9167	Uselis
30.5	36.9167	Uselis		30.5	37.1667	Thyrsus-Mündung
30.5	37.1667	Thyrsus-Mündung		30.3333	37.3333	Tharros
30.3333	37.3333	Tharros		30.3333	37.5833	Raben-Hafen
30.3333	37.5	Raben-Hafen		30.25	38	Temus-Mündung
30.25	38	Temus-Mündung		30	38.25	Kap Hermaeum
30	38.25	Kap Hermaeum		30.1667	38.5	Nymphaeum
30.1667	38.5	Nymphaeum		30	38.6667	Tilium
30	38.6667	Tilium		29.8333	38.75	Gorditanisches Kap
29.8333	38.75	Gorditanisches Kap		30.25	38.8333	Turris Libisonis*
30.25	38.8333	Turris Libisonis*		30.6667	38.8333	Tibula
30.6667	38.8333	Tibula		31.1667	39	Iuliola
31.3333	39	Iuliola		31.5	39.0833	Plubium
31.3333	39.0833	Plubium		31.5	39.5	Kap Errebantium
31.5	39.3333	Serrebantion		31.75	39.5	Bären-Kap
31.75	39.1667	Bären-Kap		31.75	39	Kap Colymbarium
31.75	39	Kap Colymbarium		31.6667	38.75	Hafen von Olbia
31.6667	38.75	Hafen von Olbia		31.6667	38.5	Olbia
31.6667	38.5	Olbia		31.75	38.1667	Feronia
31.75	38.1667	Feronia		32	38	Caedris-Mündung
32	38	Caedris-Mündung		31.833	37.167	Sypicius / Solpicius
31.8333	37.5	Solpicius		32	37	Saeprus-Mündung
32	37	Saeprus-Mündung		31.9167	36.6667	Susaleus*
31.9167	36.6667	Susaleus*		32.1667	36.3333	Golf von Carales
32.1667	36.3333	Golf von Carales		32.5	36	Carales*
32.5	36	Carales*		32.0833	35.9167	Echo-Küste
32.25	35.9167	Echo-Küste		32.25	35.5833	Kap Cuniucharium
				32	35.4167	Nora
				32	35.8333	Hercules-Hafen
				31.6667	35.8333	Bithia
				31.5	35.75	Chersonesos
				30.8333	35.6667	Pupulum
SICILY
39.5	37.3333	Kap Tauros		39.4167	37.5	Alabon-Mündung
39.5	37.1667	Alabon-Mündung		39.5833	37.3333	Kap Tauros
39.3333	37	Syrakusai		39.5	37.25	Syrakusai
39.6667	36.9167	Chersonesos		39.6667	36.9167	Chersonesos
39.8333	36.75	Grosses Kap		39.8333	36.75	Grosses Kap
39.75	36.6667	Erineos-Mündung		39.75	36.6667	Erineos-Mündung
39.75	36.5	Phönizischer Hafen		39.75	36.5	Phönizischer Hafen
40	36.3333	Kap Pachynos		40	36.3333	Kap Pachynos
39.8333	36.25	Odysseus-Kap		39.8333	36.25	Odysseus-Kap
39.6667	36.3333	Motychanos-Mündung		39.6667	36.3333	Motychanos-Mündung
39.5	36.25	Kaukana		39.5	36.25	Kaukana
39.3333	36.3333	Kap Bukra		39.3333	36.3333	Kap Bukra
39.25	36.3333	Hipparis-Mündung		39.25	36.3333	Hipparis-Mündung
39	36.3333	Himeras-Mündung		39	36.3333	Himeras-Mündung
38.8333	36.4167	Emporion von Akragas		38.8333	36.4167	Emporion von Akragas
38.5	36.4167	Hypsas-Mündung		38.5	36.4167	Hypsas-Mündung
38.3333	36.4167	Herakleia Minoa		38.3333	36.4167	Herakleia Minoa
38.0833	36.4167	Isburos-Mündung		38.0833	36.4167	Isburos-Mündung
37.8333	36.3333	Kossios-Mündung
37.6667	36.3333	Pintia		37.6667	36.3333	Pintia
37.5	36.25	Mazara-Mündung		37.5	36.25	Mazara-Mündung
37.3333	36.25	Selinus-Mündung		37.3333	36.25	Selinus-Mündung
37.1667	36.0833	Akithios-Mündung		37.1667	36.0833	Akithios-Mündung
37	36	Kap Lilybaion		37	36	Kap Lilybaion
36.8333	36.25	Kap Aigitharsos		36.8333	36.25	Kap Aigitharsos
36.9167	36.5	Emporion von Segesta (X)		36.5	36.5	Emporion von Segesta
37	36.6667	Drepanon		37	36.5	Drepanon
37	36.75	Bathys-Mündung		37	36.6667	Bathys-Mündung
37.0833	36.6667	Ketaria		37	36.75	Ketaria
37	37	Panormos		37	37	Panormos
37	37.0833	Eleutheros-Mündung		37	37.0833	Eleutheros-Mündung
37	37.1667	Solus		37	37.3333	Solus
37.0833	37.25	Thermai Himeraiai		37.0833	37.25	Thermai Himeraiai
37.25	37.3333	Himeras-Mündung		37.25	37.3333	Himeras-Mündung
37.3333	37.6667	Kephaloidis		37.3333	37.6667	Kephaloidis
37.5	37.75	Monalos-Mündung		37.5	37.75	Monalos-Mündung
37.6667	37.9167	Alaisa		37.6667	37.75	Alaisa
37.6667	38	Kalakte		37.6667	37.9167	Kalakte
37.75	38.0833	Chydas-Mündung		37.75	38.0833	Chydas-Mündung
37.8333	38.0833	Alontion		37.8333	38.1667	Alontion
38	38.25	Agathyrnon		38	38.25	Agathyrnon
38.3333	38.3333	Timetos-Mündung		38.3333	38.3333	Timetos-Mündung
38.5	38.3333	Tyndaris		38.5	38.3333	Tyndaris
38.8333	38.4167	Helikon-Mündung		38.8333	38.4167	Helikon-Mündung
39	38.5	Mylai		39	38.5	Mylai
39.1667	38.5	Kap Phalakrion		39.1667	38.5	Kap Phalakrion
39.3333	38.5833	Kap Peloros (Omega)		39.3333	38.5833	Kap Peloros
39.5	38.3333	Messene*		39.5	38.5	Messene*
39.5	38.1667	Kap Argennon		39.5	38.1667	Kap Argennon
39.5	37.8333	Tauromenion		39.5	37.8333	Tauromenion
39.5	37.75	Symaithos-Mündung		39.5	37.75	Symaithos-Mündung
39.5833	37.6667	Katane		39.5833	37.6667	Katane
39.4167	37.5	Pantakyas-Mündung		39.3333	37.5833	Pantakyas-Mündung
CRETE
55.6667	35.25	Itanos		55.667	35.25	Itanos polis / Erimupolis
55.5	35.1667	Kap Ampelos		55.5	35	Kap Ampelos
55.3333	35.0833	Erythräisches Kap		55.3333	35	Erythräisches Kap
55.25	35	Hiera Petra		55.25	35.0833	Hiera Petra
55.1667	35	Heiliger Berg		55.1667	35	Heiliger Berg
55	34.9167	Inatos		55	34.8333	Inatos
54.8333	34.9167	Lethaios-Mündung		54.8333	34.75	Lethaios-Mündung
54.75	34.8333	Katarrhaktos-Mündung		54.75	34.8333	Katarrhaktos-Mündung
54.5833	34.8333	Lebena		54.5833	34.8333	Lebena
54.5833	34.75	Löwen-Kap		54.5833	34.5	Löwen-Kap
54.4167	34.75	Matala		54.3333	34.5	Matalia
54.1667	34.75	Elektras-Mündung		54.1667	34.5	Elektras-Mündung
54	34.75	Psychion		54	34.1667	Psychion
53.75	34.6667	Messalias-Mündung		53.75	34.1667	Masalias-Mündung
53.75	34.8333	Hafen von Phoinix		53.75	34.3333	Hafen von Phoinix
53.5833	34.75	Phoinix		53.5	34.25	Phoinix
53.25	34.6667	Kap Hermaia		53.25	34.4167	Kap Hermaia
53	34.6667	Poikilasion		53	34.5	Poikilasion
52.8333	34.6667	Tarrha		52.9167	34.3333	Tarrha
52.6667	34.5833	Lissos		52.75	34.0833	Lissos
52.5833	34.3333	Kap Kriu Metopon		52.5833	34.1667	Kap Kriu Metopon
52.5833	34.5	Inachorion		52.5833	34.3333	Inachorion
52.5	34.5	Rhamnus		52.5	34.5	Rhamnus
52.5	34.5833	Chersonesos		52.5	34.5833	Chersonesos
52.3333	34.6667	Phalasarna		52.3333	34.6667	Phalasarna
52.0833	34.6667	Korykos		52.0833	34.6667	Korykos
52.4167	34.75	Kisamos		52.25	34.8333	Kisamos
52.3333	34.8333	Kap Psakon		52.3333	34.8333	Kap Psakon
52.4167	34.8333	Diktamnon		52.4167	34.9167	Diktamnon
52.5	35	Kap Kisamon		52.5	35	Kap Kisamon
52.75	35	Kydonia		52.75	35	Kydonia
52.8333	35	Pyktos-Mündung		52.8333	35	Pyknos-Mündung
53	35	Minoa		53	35	Minoa
53.1667	35.1667	Kap Drepanon		53.1667	35.1667	Kap Drepanon
53.25	35	Golf von Amphimala		53.25	35	Golf von Amphimala
53.5	35.0833	Rhithymna		53.5	35.0833	Rhithymna
53.75	35.0833	Pantomatrion		53.75	35.0833	Pantomatrion
53.8333	35.1667	Dion		53.5	35.167	Kap Dion
54.1667	35.25	Apollonia		54.1667	35.25	Kytaion
54.3333	35.25	Panormos		54.3333	35.25	Panormos
54.6667	35.25	Herakleion		54.5	35.3333	Herakleion
54.75	35.3333	Kap Zephyrion		54.75	35.5	Kap Zephyrion
54.9167	35.3333	Chersonesos		54.9167	35.3333	Chersonesos
55	35.3333	Olus		55	35.4167	Olus
55.1667	35.3333	Kamara		55.1667	35.4167	Kamara
55.3333	35.25	Minoa		55.3333	35.3333	Minoa
55.8333	35.4167	Kap Samonion		55.8333	35.4167	Kap Samonion
CYPRUS
				64.6667	35.5833	Arsinoe
				64.6667	35.75	Kap Kallinusa
				65	36	Soloi
				65.1667	36.1667	Kap Krommyon
				65.3333	35.8333	Lapethos
				65.5	35.5833	Lapethos-Mündung
				65.6667	35.75	Keraunia
				66	35.75	Makaria
				66.5	35.6667	Aphrodision
				66.6667	35.8333	Kap der Achäer
				66.8333	35.9167	Karpasia
				67.5	35.8333	Kap Kleides
				67	35.6667	Kap Elaia
				66.6667	35.5	Salamis*
				66.8333	35.3333	Pediaios-Mündung
				67	35.1667	Kap Pedalion
				66.75	35	Kap Thronoi
				66.5	35	Kap Dades
				66.25	35	Kition
				66.1667	35	Tetios-Mündung
				65.75	35	Amathus*
				65.5	34.75	Kap Kurias
				65.3333	35.0833	Lykos-Mündung
				65	35	Kurion
				64.75	34.8333	Kap Phrurion
				64.5	34.75	Kap Drepanon
				64.5	35	Alt-Paphos
				64.1667	35.0833	Kap Zephyrion
				64.3333	35.1667	Neu-Paphos*
				64.1667	35.5	Kap Akamas

## Sheet: Ksi distances
From			To
longitude	latitude	Place name	longitude	latitude	Place name	Distance
CORSICA
31.3333	40.3333	Diana-Hafen	31.5	40.1667	Rhotanus-Mündung	104.832
31.5	40.1667	Rhotanus-Mündung	31.5	40.0833	Aleria*	41.6667
31.5	40.0833	Aleria*	31.5	40	Heiliger Fluss (Mündung)	41.6667
31.5	40	Heiliger Fluss (Mündung)	31.5	39.9167	Philonius-Hafen	41.6667
31.5	39.9167	Philonius-Hafen	31.3333	39.75	Alista	105.069
31.3333	39.75	Alista	31.5	39.6667	Kap Granianum	76.4595
31.5	39.6667	Kap Granianum	31.3333	39.5	Rubra	105.211
31.3333	39.5	Rubra	31.3333	39.4167	Syrakusanischer Hafen	41.6667
31.3333	39.4167	Syrakusanischer Hafen	31.3333	39.3333	Palla	41.6667
31.3333	39.3333	Palla	31	39.25	Kap Marianum	135.551
31	39.25	Kap Marianum	30.75	39.3333	Pitanus-Mündung	105.333
30.75	39.3333	Pitanus-Mündung	30.5	39.5	Ficaria	127.554
30.5	39.5	Ficaria	30.3333	39.5833	Titianischer Hafen	76.5892
30.3333	39.5833	Titianischer Hafen	30.25	39.6667	Ticarius-Mündung	52.5935
30.25	39.6667	Ticarius-Mündung	30.25	39.75	Pauca	41.6667
30.25	39.75	Pauca	30.1667	39.9167	Locra-Mündung	89.2648
30.1667	39.9167	Locra-Mündung	30.25	40	Sand-Küste	52.499
30.25	40	Sand-Küste	30.1667	40.1667	Urcinium	89.223
30.1667	40.1667	Urcinium	30	40.25	Kap Rhium	76.0683
30	40.25	Kap Rhium	30	40.3333	Rhoetium	41.6667
30	40.3333	Rhoetium	30.1667	40.4167	Circidius-Mündung	75.9372
30.1667	40.4167	Circidius-Mündung	30.1667	40.5	Kap Viriballum	41.6667
30.1667	40.5	Kap Viriballum	30.25	40.4167	Casalus-Bucht	52.3565
30.25	40.4167	Casalus-Bucht	30	41.6667	Kap Cattius	632.07
30	41.6667	Kap Cattius	30	41	Caesia-Strand	333.333
30	41	Caesia-Strand	30.5	41.1667	Kap Tilox	206.042
30.5	41.1667	Kap Tilox	30.6667	41	Vilerius-Mündung	104.355
30.6667	41	Vilerius-Mündung	31	41.3333	Cenelata	208.613
31	41.3333	Cenelata	31.25	41.5	Centurinum	125.426
31.25	41.5	Centurinum	31.5	41.5	Heiliges Kap	93.6194
31.5	41.5	Heiliges Kap	31.3333	41.1667	Clunium	178.026
31.3333	41.1667	Clunium	31.3333	41	Mantinum	83.3333
31.3333	41	Mantinum	31.5	40.75	Kap Avagum	139.984
31.5	40.75	Kap Avagum	31.3333	40.6667	Mariana*	75.674
31.3333	40.6667	Mariana*	31.5	40.5833	Tavola-Mündung	75.7399
31.5	40.5833	Tavola-Mündung	31.5	40.5	Altar der Tutela	41.6667
31.5	40.5	Altar der Tutela	31.3333	40.3333	Diana-Hafen	104.737
						4060.49
SICILY
39.5	37.3333	Kap Tauros	39.5	37.1667	Alabon-Mündung	83.3333
39.5	37.1667	Alabon-Mündung	39.3333	37	Syrakusai	106.602
39.3333	37	Syrakusai	39.6667	36.9167	Chersonesos	139.545
39.6667	36.9167	Chersonesos	39.8333	36.75	Grosses Kap	106.739
39.8333	36.75	Grosses Kap	39.75	36.6667	Erineos-Mündung	53.4033
39.75	36.6667	Erineos-Mündung	39.75	36.5	Phönizischer Hafen	83.3333
39.75	36.5	Phönizischer Hafen	40	36.3333	Kap Pachynos	130.625
40	36.3333	Kap Pachynos	39.8333	36.25	Odysseus-Kap	79.042
39.8333	36.25	Odysseus-Kap	39.6667	36.3333	Motychanos-Mündung	79.0419
39.6667	36.3333	Motychanos-Mündung	39.5	36.25	Kaukana	79.042
39.5	36.25	Kaukana	39.3333	36.3333	Kap Bukra	79.042
39.3333	36.3333	Kap Bukra	39.25	36.3333	Hipparis-Mündung	33.566
39.25	36.3333	Hipparis-Mündung	39	36.3333	Himeras-Mündung	100.698
39	36.3333	Himeras-Mündung	38.8333	36.4167	Emporion von Akragas	78.9809
38.8333	36.4167	Emporion von Akragas	38.5	36.4167	Hypsas-Mündung	134.12
38.5	36.4167	Hypsas-Mündung	38.3333	36.4167	Herakleia Minoa	67.0601
38.3333	36.4167	Herakleia Minoa	38.0833	36.4167	Isburos-Mündung	100.59
38.0833	36.4167	Isburos-Mündung	37.8333	36.3333	Kossios-Mündung	108.928
37.8333	36.3333	Kossios-Mündung	37.6667	36.3333	Pintia	67.132
37.6667	36.3333	Pintia	37.5	36.25	Mazara-Mündung	79.042
37.5	36.25	Mazara-Mündung	37.3333	36.25	Selinus-Mündung	67.2037
37.3333	36.25	Selinus-Mündung	37.1667	36.0833	Akithios-Mündung	107.1
37.1667	36.0833	Akithios-Mündung	37	36	Kap Lilybaion	79.2244
37	36	Kap Lilybaion	36.8333	36.25	Kap Aigitharsos	141.971
36.8333	36.25	Kap Aigitharsos	36.9167	36.5	Emporion von Segesta (X)	129.424
36.9167	36.5	Emporion von Segesta (X)	37	36.6667	Drepanon	89.7991
37	36.6667	Drepanon	37	36.75	Bathys-Mündung	41.6667
37	36.75	Bathys-Mündung	37.0833	36.6667	Ketaria	53.4033
37.0833	36.6667	Ketaria	37	37	Panormos	169.97
37	37	Panormos	37	37.0833	Eleutheros-Mündung	41.6667
37	37.0833	Eleutheros-Mündung	37	37.1667	Solus	41.6667
37	37.1667	Solus	37.0833	37.25	Thermai Himeraiai	53.2669
37.0833	37.25	Thermai Himeraiai	37.25	37.3333	Himeras-Mündung	78.3031
37.25	37.3333	Himeras-Mündung	37.3333	37.6667	Kephaloidis	169.913
37.3333	37.6667	Kephaloidis	37.5	37.75	Monalos-Mündung	77.991
37.5	37.75	Monalos-Mündung	37.6667	37.9167	Alaisa	106.19
37.6667	37.9167	Alaisa	37.6667	38	Kalakte	41.6667
37.6667	38	Kalakte	37.75	38.0833	Chydas-Mündung	53.0372
37.75	38.0833	Chydas-Mündung	37.8333	38.0833	Alontion	32.7964
37.8333	38.0833	Alontion	38	38.25	Agathyrnon	106.005
38	38.25	Agathyrnon	38.3333	38.3333	Timetos-Mündung	137.287
38.3333	38.3333	Timetos-Mündung	38.5	38.3333	Tyndaris	65.368
38.5	38.3333	Tyndaris	38.8333	38.4167	Helikon-Mündung	137.143
38.8333	38.4167	Helikon-Mündung	39	38.5	Mylai	77.4231
39	38.5	Mylai	39.1667	38.5	Kap Phalakrion	65.2173
39.1667	38.5	Kap Phalakrion	39.3333	38.5833	Kap Peloros (Omega)	77.3595
39.3333	38.5833	Kap Peloros (Omega)	39.5	38.3333	Messene*	141.008
39.5	38.3333	Messene*	39.5	38.1667	Kap Argennon	83.3333
39.5	38.1667	Kap Argennon	39.5	37.8333	Tauromenion	166.667
39.5	37.8333	Tauromenion	39.5	37.75	Symaithos-Mündung	41.6667
39.5	37.75	Symaithos-Mündung	39.5833	37.6667	Katane	53.1294
39.5833	37.6667	Katane	39.4167	37.5	Pantakyas-Mündung	106.328
39.4167	37.5	Pantakyas-Mündung	39.5	37.3333	Kap Tauros	89.6638
						4713.72
CRATE
55.6667	35.25	Itanos	55.5	35.1667	Kap Ampelos	79.8257
55.5	35.1667	Kap Ampelos	55.3333	35.0833	Erythräisches Kap	79.8852
55.3333	35.0833	Erythräisches Kap	55.25	35	Hiera Petra	53.8505
55.25	35	Hiera Petra	55.1667	35	Heiliger Berg	34.1313
55.1667	35	Heiliger Berg	55	34.9167	Inatos	80.004
55	34.9167	Inatos	54.8333	34.9167	Lethaios-Mündung	68.3321
54.8333	34.9167	Lethaios-Mündung	54.75	34.8333	Katarrhaktos-Mündung	53.8945
54.75	34.8333	Katarrhaktos-Mündung	54.5833	34.8333	Lebena	68.4014
54.5833	34.8333	Lebena	54.5833	34.75	Löwen-Kap	41.6667
54.5833	34.75	Löwen-Kap	54.4167	34.75	Matala	68.4706
54.4167	34.75	Matala	54.1667	34.75	Elektras-Mündung	102.706
54.1667	34.75	Elektras-Mündung	54	34.75	Psychion	68.4706
54	34.75	Psychion	53.75	34.6667	Messalias-Mündung	110.884
53.75	34.6667	Messalias-Mündung	53.75	34.8333	Hafen von Phoinix	83.3333
53.75	34.8333	Hafen von Phoinix	53.5833	34.75	Phoinix	80.1224
53.5833	34.75	Phoinix	53.25	34.6667	Kap Hermaia	143.206
53.25	34.6667	Kap Hermaia	53	34.6667	Poikilasion	102.809
53	34.6667	Poikilasion	52.8333	34.6667	Tarrha	68.5396
52.8333	34.6667	Tarrha	52.6667	34.5833	Lissos	80.2403
52.6667	34.5833	Lissos	52.5833	34.3333	Kap Kriu Metopon	129.635
52.5833	34.3333	Kap Kriu Metopon	52.5833	34.5	Inachorion	83.3333
52.5833	34.5	Inachorion	52.5	34.5	Rhamnus	34.3386
52.5	34.5	Rhamnus	52.5	34.5833	Chersonesos	41.6667
52.5	34.5833	Chersonesos	52.3333	34.6667	Phalasarna	80.2403
52.3333	34.6667	Phalasarna	52.0833	34.6667	Korykos	102.809
52.0833	34.6667	Korykos	52.4167	34.75	Kisamos	143.206
52.4167	34.75	Kisamos	52.3333	34.8333	Kap Psakon	53.9164
52.3333	34.8333	Kap Psakon	52.4167	34.8333	Diktamnon	34.2007
52.4167	34.8333	Diktamnon	52.5	35	Kap Kisamon	90.0653
52.5	35	Kap Kisamon	52.75	35	Kydonia	102.394
52.75	35	Kydonia	52.8333	35	Pyktos-Mündung	34.1313
52.8333	35	Pyktos-Mündung	53	35	Minoa	68.2627
53	35	Minoa	53.1667	35.1667	Kap Drepanon	107.679
53.1667	35.1667	Kap Drepanon	53.25	35	Golf von Amphimala	90.039
53.25	35	Golf von Amphimala	53.5	35.0833	Rhithymna	110.499
53.5	35.0833	Rhithymna	53.75	35.0833	Pantomatrion	102.29
53.75	35.0833	Pantomatrion	53.8333	35.1667	Dion	53.8284
53.8333	35.1667	Dion	54.1667	35.25	Apollonia	142.409
54.1667	35.25	Apollonia	54.3333	35.25	Panormos	68.0535
54.3333	35.25	Panormos	54.6667	35.25	Herakleion	136.107
54.6667	35.25	Herakleion	54.75	35.3333	Kap Zephyrion	53.7842
54.75	35.3333	Kap Zephyrion	54.9167	35.3333	Chersonesos	67.9834
54.9167	35.3333	Chersonesos	55	35.3333	Olus	33.9917
55	35.3333	Olus	55.1667	35.3333	Kamara	67.9834
55.1667	35.3333	Kamara	55.3333	35.25	Minoa	79.766
55.3333	35.25	Minoa	55.8333	35.4167	Kap Samonion	220.318
55.8333	35.4167	Kap Samonion	55.6667	35.25	Itanos	107.546
						3909.25

## Sheet: Omega distances
From			To
longitude	latitude	Place name	longitude	latitude	Place name	Distance
CORSICA
31.3333	40.3333	Diana-Hafen	31.5	40.1667	Rhotanus-Mündung	104.832
31.5	40.1667	Rhotanus-Mündung	31.5	40.0833	Aleria*	41.6667
31.5	40.0833	Aleria*	31.5	40	Heiliger Fluss (Mündung)	41.6667
31.5	40	Heiliger Fluss (Mündung)	31.75	39.9167	Philonius-Hafen	104.482
31.75	39.9167	Philonius-Hafen	31.3333	39.75	Alista	180.384
31.3333	39.75	Alista	31.5833	39.6667	Kap Granianum	104.802
31.5833	39.6667	Kap Granianum	31.4167	39.5833	Rubra	76.5244
31.4167	39.5833	Rubra	31.4167	39.4167	Syrakusanischer Hafen	83.3333
31.4167	39.4167	Syrakusanischer Hafen	31.3333	39.3333	Palla	52.6642
31.3333	39.3333	Palla	30.8333	39.1667	Kap Marianum	210.771
30.8333	39.1667	Kap Marianum	30.25	39.3333	Pitanus-Mündung	240.747
30.25	39.3333	Pitanus-Mündung	30.5	39.5	Fisera / Ficaria	127.554
30.5	39.5	Fisera / Ficaria	30.1667	39.5833	Titianischer Hafen	135.112
30.1667	39.5833	Titianischer Hafen	30.25	39.6667	Ticarius-Mündung	52.5935
30.25	39.6667	Ticarius-Mündung	30.25	39.75	Pauca	41.6667
30.25	39.75	Pauca	30.1667	39.9167	Locra-Mündung	89.2648
30.1667	39.9167	Locra-Mündung	30.25	40	Sand-Küste	52.499
30.25	40	Sand-Küste	30.1667	40.1667	Urcinium	89.223
30.1667	40.1667	Urcinium	30	40.25	Kap Rhium	76.0683
30	40.25	Kap Rhium	30	40.3333	Rhoetium	41.6667
30	40.3333	Rhoetium	30	40.4167	Circidius-Mündung	41.6667
30	40.4167	Circidius-Mündung	30	40.5	Kap Viriballum	41.6667
30	40.5	Kap Viriballum	30.25	40.4167	Casalus-Bucht	103.836
30.25	40.4167	Casalus-Bucht	30	41.1667	Kap Attius	386.757
30	41.1667	Kap Attius	30	41.5	Kap Tilox	166.667
30	41.5	Kap Tilox	30.5	41.1667	Caesia-Strand	251.03
30.5	41.1667	Caesia-Strand	30.67	41	Volerius M,	105.116
30.67	41	Volerius M,	31	41.0833	Canelata	131.238
31	41.0833	Canelata	31.25	41.5	Centurinum	228.525
31.25	41.5	Centurinum	31.5833	41.5	Heiliges Kap	124.826
31.5833	41.5	Heiliges Kap	31.3333	41.1667	Clunium	191.278
31.3333	41.1667	Clunium	31.3333	41	Mantinum	83.3333
31.3333	41	Mantinum	31.58	40.75	Kap Vagum	155.955
31.58	40.75	Kap Vagum	31.3333	40.6667	Mariana*	102.356
31.3333	40.6667	Mariana*	31.5	40.58	Tuola/Tavola M,	76.6707
31.5	40.58	Tuola/Tavola M,	31.5	40.5	Altar der Tutela	40
31.5	40.5	Altar der Tutela	31.3333	40.3333	Diana-Hafen	104.737
						4283.18
SARDINIA
30.75	35.8333	Sulci* (Ksi)	30.6667	36	Breites Kap	89.9063
30.6667	36	Breites Kap	30.6667	36.5	Neapolis	250
30.6667	36.5	Neapolis	30.5	36.3333	Heiligtum des Sardus Pater	106.965
30.5	36.3333	Heiligtum des Sardus Pater	30.5	36.5	Osaea	83.3333
30.5	36.5	Osaea	30.5	36.6667	Heiliger Fluss (Mündung)	83.3333
30.5	36.6667	Heiliger Fluss (Mündung)	30.5	36.9167	Uselis	125
30.5	36.9167	Uselis	30.5	37.1667	Thyrsus-Mündung	125
30.5	37.1667	Thyrsus-Mündung	30.3333	37.3333	Tharros	106.511
30.3333	37.3333	Tharros	30.3333	37.5833	Raben-Hafen	125
30.3333	37.5833	Raben-Hafen	30.25	38	Temus-Mündung	210.919
30.25	38	Temus-Mündung	30	38.25	Kap Hermaeum	159.042
30	38.25	Kap Hermaeum	30.1667	38.5	Nymphaeum	141.043
30.1667	38.5	Nymphaeum	30	38.6667	Tilium	105.773
30	38.6667	Tilium	29.8333	38.75	Gorditanisches Kap	77.232
29.8333	38.75	Gorditanisches Kap	30.25	38.8333	Turris Libisonis*	167.641
30.25	38.8333	Turris Libisonis*	30.6667	38.8333	Tibula	162.286
30.6667	38.8333	Tibula	31.1667	39	Iuliola	211.614
31.1667	39	Iuliola	31.5	39.0833	Plubium	135.989
31.5	39.0833	Plubium	31.5	39.5	Kap Errebantium	208.333
31.5	39.5	Kap Errebantium	31.75	39.5	Bären-Kap	96.453
31.75	39.5	Bären-Kap	31.75	39	Kap Colymbarium	250
31.75	39	Kap Colymbarium	31.6667	38.75	Hafen von Olbia	129.14
31.6667	38.75	Hafen von Olbia	31.6667	38.5	Olbia	125
31.6667	38.5	Olbia	31.75	38.1667	Feronia	169.841
31.75	38.1667	Feronia	32	38	Caedris-Mündung	128.937
32	38	Caedris-Mündung	31.833	37.167	Sypicius / Solpicius	421.723
31.833	37.167	Sypicius / Solpicius	32	37	Saeprus-Mündung	106.815
32	37	Saeprus-Mündung	31.9167	36.6667	Susaleus*	169.97
31.9167	36.6667	Susaleus*	32.1667	36.3333	Golf von Carales	194.613
32.1667	36.3333	Golf von Carales	32.5	36	Carales*	214.2
32.5	36	Carales*	32.0833	35.9167	Echo-Küste	173.705
32.0833	35.9167	Echo-Küste	32.25	35.5833	Kap Cuniucharium	179.866
32.25	35.5833	Kap Cuniucharium	32	35.4167	Nora	131.531
32	35.4167	Nora	32	35.8333	Hercules-Hafen	208.333
32	35.8333	Hercules-Hafen	31.6667	35.8333	Bithia	135.12
31.6667	35.8333	Bithia	31.5	35.75	Chersonesos	79.4059
31.5	35.75	Chersonesos	30.8333	35.6667	Pupulum	273.854
30.8333	35.6667	Pupulum	30.75	35.8333	Sulci* (Ksi)	89.9329
						5953.36
SICILY
39.4167	37.5	Alabon-Mündung	39.5833	37.3333	Kap Tauros	106.419
39.5833	37.3333	Kap Tauros	39.5	37.25	Syrakusai	53.244
39.5	37.25	Syrakusai	39.6667	36.9167	Chersonesos	179.436
39.6667	36.9167	Chersonesos	39.8333	36.75	Grosses Kap	106.739
39.8333	36.75	Grosses Kap	39.75	36.6667	Erineos-Mündung	53.4033
39.75	36.6667	Erineos-Mündung	39.75	36.5	Phönizischer Hafen	83.3333
39.75	36.5	Phönizischer Hafen	40	36.3333	Kap Pachynos	130.625
40	36.3333	Kap Pachynos	39.8333	36.25	Odysseus-Kap	79.042
39.8333	36.25	Odysseus-Kap	39.6667	36.3333	Motychanos-Mündung	79.0419
39.6667	36.3333	Motychanos-Mündung	39.5	36.25	Kaukana	79.042
39.5	36.25	Kaukana	39.3333	36.3333	Kap Bukra	79.042
39.3333	36.3333	Kap Bukra	39.25	36.3333	Hipparis-Mündung	33.566
39.25	36.3333	Hipparis-Mündung	39	36.3333	Himeras-Mündung	100.698
39	36.3333	Himeras-Mündung	38.8333	36.4167	Emporion von Akragas	78.9809
38.8333	36.4167	Emporion von Akragas	38.5	36.4167	Hypsas-Mündung	134.12
38.5	36.4167	Hypsas-Mündung	38.3333	36.4167	Herakleia Minoa	67.0601
38.3333	36.4167	Herakleia Minoa	38.0833	36.4167	Isburos-Mündung	100.59
38.0833	36.4167	Isburos-Mündung	37.6667	36.3333	Pintia	172.838
37.6667	36.3333	Pintia	37.5	36.25	Mazara-Mündung	79.042
37.5	36.25	Mazara-Mündung	37.3333	36.25	Selinus-Mündung	67.2037
37.3333	36.25	Selinus-Mündung	37.1667	36.0833	Akithios-Mündung	107.1
37.1667	36.0833	Akithios-Mündung	37	36	Kap Lilybaion	79.2244
37	36	Kap Lilybaion	36.8333	36.25	Kap Aigitharsos	141.971
36.8333	36.25	Kap Aigitharsos	36.5	36.5	Emporion von Segesta	183.391
36.5	36.5	Emporion von Segesta	37	36.5	Drepanon	200.964
37	36.5	Drepanon	37	36.6667	Bathys-Mündung	83.3333
37	36.6667	Bathys-Mündung	37	36.75	Ketaria	41.6667
37	36.75	Ketaria	37	37	Panormos	125
37	37	Panormos	37	37.0833	Eleutheros-Mündung	41.6667
37	37.0833	Eleutheros-Mündung	37	37.3333	Solus	125
37	37.3333	Solus	37.0833	37.25	Thermai Himeraiai	53.244
37.0833	37.25	Thermai Himeraiai	37.25	37.3333	Himeras-Mündung	78.3031
37.25	37.3333	Himeras-Mündung	37.3333	37.6667	Kephaloidis	169.913
37.3333	37.6667	Kephaloidis	37.5	37.75	Monalos-Mündung	77.991
37.5	37.75	Monalos-Mündung	37.6667	37.75	Alaisa	65.8908
37.6667	37.75	Alaisa	37.6667	37.9167	Kalakte	83.3333
37.6667	37.9167	Kalakte	37.75	38.0833	Chydas-Mündung	89.5684
37.75	38.0833	Chydas-Mündung	37.8333	38.1667	Alontion	53.0141
37.8333	38.1667	Alontion	38	38.25	Agathyrnon	77.6132
38	38.25	Agathyrnon	38.3333	38.3333	Timetos-Mündung	137.287
38.3333	38.3333	Timetos-Mündung	38.5	38.3333	Tyndaris	65.368
38.5	38.3333	Tyndaris	38.8333	38.4167	Helikon-Mündung	137.143
38.8333	38.4167	Helikon-Mündung	39	38.5	Mylai	77.4231
39	38.5	Mylai	39.1667	38.5	Kap Phalakrion	65.2173
39.1667	38.5	Kap Phalakrion	39.3333	38.5833	Kap Peloros	77.3595
39.3333	38.5833	Kap Peloros	39.5	38.5	Messene*	77.3595
39.5	38.5	Messene*	39.5	38.1667	Kap Argennon	166.667
39.5	38.1667	Kap Argennon	39.5	37.8333	Tauromenion	166.667
39.5	37.8333	Tauromenion	39.5	37.75	Symaithos-Mündung	41.6667
39.5	37.75	Symaithos-Mündung	39.5833	37.6667	Katane	53.1294
39.5833	37.6667	Katane	39.3333	37.5833	Pantakyas-Mündung	107.414
39.3333	37.5833	Pantakyas-Mündung	39.4167	37.5	Alabon-Mündung	53.1753
						4967.53
CRETE
55.667	35.25	Itanos polis / Erimupolis	55.5	35	Kap Ampelos	142.44
55.5	35	Kap Ampelos	55.3333	35	Erythräisches Kap	68.2627
55.3333	35	Erythräisches Kap	55.25	35.0833	Hiera Petra	53.8505
55.25	35.0833	Hiera Petra	55.1667	35	Heiliger Berg	53.8505
55.1667	35	Heiliger Berg	55	34.8333	Inatos	107.767
55	34.8333	Inatos	54.8333	34.75	Lethaios-Mündung	80.1224
54.8333	34.75	Lethaios-Mündung	54.75	34.8333	Katarrhaktos-Mündung	53.9164
54.75	34.8333	Katarrhaktos-Mündung	54.5833	34.8333	Lebena	68.4014
54.5833	34.8333	Lebena	54.5833	34.5	Löwen-Kap	166.667
54.5833	34.5	Löwen-Kap	54.1667	34.5	Elektras-Mündung	171.693
54.1667	34.5	Elektras-Mündung	54	34.1667	Psychion	180.314
54	34.1667	Psychion	53.75	34.1667	Masalias-Mündung	103.426
53.75	34.1667	Masalias-Mündung	53.75	34.3333	Hafen von Phoinix	83.3333
53.75	34.3333	Hafen von Phoinix	53.5	34.25	Phoinix	111.361
53.5	34.25	Phoinix	53.25	34.4167	Kap Hermaia	132.661
53.25	34.4167	Kap Hermaia	53	34.5	Poikilasion	111.171
53	34.5	Poikilasion	52.9167	34.3333	Tarrha	90.144
52.9167	34.3333	Tarrha	52.75	34.0833	Lissos	142.739
52.75	34.0833	Lissos	52.5833	34.1667	Kap Kriu Metopon	80.5915
52.5833	34.1667	Kap Kriu Metopon	52.5833	34.3333	Inachorion	83.3333
52.5833	34.3333	Inachorion	52.5	34.5	Rhamnus	90.144
52.5	34.5	Rhamnus	52.5	34.5833	Chersonesos	41.6667
52.5	34.5833	Chersonesos	52.3333	34.6667	Phalasarna	80.2403
52.3333	34.6667	Phalasarna	52.0833	34.6667	Korykos	102.809
52.0833	34.6667	Korykos	52.25	34.8333	Kisamos	107.855
52.25	34.8333	Kisamos	52.3333	34.8333	Kap Psakon	34.2007
52.3333	34.8333	Kap Psakon	52.4167	34.9167	Diktamnon	53.8945
52.4167	34.9167	Diktamnon	52.5	35	Kap Kisamon	53.8725
52.5	35	Kap Kisamon	52.75	35	Kydonia	102.394
52.75	35	Kydonia	52.8333	35	Pyknos-Mündung	34.1313
52.8333	35	Pyknos-Mündung	53	35	Minoa	68.2627
53	35	Minoa	53.1667	35.1667	Kap Drepanon	107.679
53.1667	35.1667	Kap Drepanon	53.25	35	Golf von Amphimala	90.039
53.25	35	Golf von Amphimala	53.5	35.0833	Rhithymna	110.499
53.5	35.0833	Rhithymna	53.75	35.0833	Pantomatrion	102.29
53.75	35.0833	Pantomatrion	53.5	35.167	Kap Dion	110.465
53.5	35.167	Kap Dion	54.1667	35.25	Kytaion	275.496
54.1667	35.25	Kytaion	54.3333	35.25	Panormos	68.0535
54.3333	35.25	Panormos	54.5	35.3333	Herakleion	79.766
54.5	35.3333	Herakleion	54.75	35.5	Kap Zephyrion	131.613
54.75	35.5	Kap Zephyrion	54.9167	35.3333	Chersonesos	107.502
54.9167	35.3333	Chersonesos	55	35.4167	Olus	53.762
55	35.4167	Olus	55.1667	35.4167	Kamara	67.9133
55.1667	35.4167	Kamara	55.3333	35.3333	Minoa	79.7063
55.3333	35.3333	Minoa	55.8333	35.4167	Kap Samonion	208.06
55.8333	35.4167	Kap Samonion	55.667	35.25	Itanos polis / Erimupolis	107.46
						4555.82
CYPRUS
64.6667	35.5833	Arsinoe	64.6667	35.75	Kap Kallinusa	83.3333
64.6667	35.75	Kap Kallinusa	65	36	Soloi	184.02
65	36	Soloi	65.1667	36.1667	Kap Krommyon	107.145
65.1667	36.1667	Kap Krommyon	65.3333	35.8333	Lapethos	179.786
65.3333	35.8333	Lapethos	65.5	35.5833	Lapethos-Mündung	142.14
65.5	35.5833	Lapethos-Mündung	65.6667	35.75	Keraunia	107.368
65.6667	35.75	Keraunia	66	35.75	Makaria	135.262
66	35.75	Makaria	66.5	35.6667	Aphrodision	207.231
66.5	35.6667	Aphrodision	66.6667	35.8333	Kap der Achäer	107.324
66.6667	35.8333	Kap der Achäer	66.8333	35.9167	Karpasia	79.3455
66.8333	35.9167	Karpasia	67.5	35.8333	Kap Kleides	273.294
67.5	35.8333	Kap Kleides	67	35.6667	Kap Elaia	219.34
67	35.6667	Kap Elaia	66.6667	35.5	Salamis*	159.113
66.6667	35.5	Salamis*	66.8333	35.3333	Pediaios-Mündung	107.502
66.8333	35.3333	Pediaios-Mündung	67	35.1667	Kap Pedalion	107.59
67	35.1667	Kap Pedalion	66.75	35	Kap Thronoi	131.938
66.75	35	Kap Thronoi	66.5	35	Kap Dades	102.394
66.5	35	Kap Dades	66.25	35	Kition	102.394
66.25	35	Kition	66.1667	35	Tetios-Mündung	34.1313
66.1667	35	Tetios-Mündung	65.75	35	Amathus*	170.657
65.75	35	Amathus*	65.5	34.75	Kap Kurias	161.683
65.5	34.75	Kap Kurias	65.3333	35.0833	Lykos-Mündung	180.131
65.3333	35.0833	Lykos-Mündung	65	35	Kurion	142.675
65	35	Kurion	64.75	34.8333	Kap Phrurion	132.1
64.75	34.8333	Kap Phrurion	64.5	34.75	Kap Drepanon	110.788
64.5	34.75	Kap Drepanon	64.5	35	Alt-Paphos	125
64.5	35	Alt-Paphos	64.1667	35.0833	Kap Zephyrion	142.675
64.1667	35.0833	Kap Zephyrion	64.3333	35.1667	Neu-Paphos*	79.8852
64.3333	35.1667	Neu-Paphos*	64.1667	35.5	Kap Akamas	179.999
64.1667	35.5	Kap Akamas	64.6667	35.5833	Arsinoe	207.646
						4203.89
