# Supplementary material for: The length of coastlines in Ptolemy'sGeographyand in&#160;ancient&#160;periploi
Source: Copernicus journal article supplement (doi:10.5194/hgss-9-9-2018), 2018-02-01
Supplement: Supplementary file 4 [file Mediterranean.xls]

## Sheet: Ksi and Omega compared
Ξ data сlearly corrupted due to scribal errors					Recension Ξ (including corrected values)				Recension Ω
longitude	latitude	Place name			longitude	latitude	Place name		longitude	latitude	Place name
					6.5	35.9167	Tingis Caesarea*		6.5	35.9167	Tingis Caesarea*
					7	35.8333	Ualon-Mündung		7	35.8333	Ualon-Mündung
					7.5	35.9167	Exilissa		7.5	35.9167	Exilissa
					7.5	35.8333	Heptadelphoi-Gebirge		7.66667	35.8333	Heptadelphoi-Gebirge
					7.83333	35.6667	Abyle		7.83333	35.6667	Abyle
					8	35.5	Kapdes Phoibos		8	35.5	Kap des Phoibos
					8.33333	35.0833	Iagath		8.33333	35.0833	Iagath
					8.5	35	Thaluda-Mündung		8.5	35	Thaluda-Mündung
					8.83333	35.1667	Kap Oleastron		8.83333	35.1667	Kap Oleastron
					9	34.9167	Akrath		9	34.9167	Akrath
					9.5	34.5	Taenia Longa		9.5	34.5	Taenia Longa
					10	35	Kap Sestiaria		10	35	Kap Sestiaria
10	34.75	Rusaddir			10.1667	34.75	Rusaddir		10.1667	34.75	Rusaddir
10.1667	34.45	Kap Metagonion			10.5	34.9167	Kap Metagonion		10.5	34.9167	Kap Metagonion
					10.75	34.75	Molachath-Mündung		10.75	34.75	Molachath-Mündung
					11.1667	34.8333	Malua-Mündung		11.1667	34.8333	Malua-Mündung
					11.75	35	Grosses Kap		11.5	35	Grosses Kap
					11.8333	34.75	Gypsaria		11.8333	34.75	Gypsaria
					12	34.6667	Siga		12	34.6667	Siga
					12.25	34.6667	Siga-Mündung		12.25	34.6667	Siga-Mündung
					12.5	34.25	Assarath-Mündung		12.5	34.5	Asarath-Mündung
					12.75	34.5	Portus Magnus		12.75	34.5	Portus Magnus
					13	34	Chylemath-Mündung		13	34	Chylemath-Mündung
					13.3333	34	Quiza		13.3333	34	Quiza
					13.5	33.75	Portus Divinus		13.5	33.75	Portus Divinus
					13.8333	33.8333	Arsenaria		13.8333	33.8333	Arsenaria
					14.25	33.6667	Kartennos-Mündung		14.25	33.6667	Kartennos-Mündung
					14.5	33.6667	Cartennae*		14.5	33.6667	Cartennae*
					14.8333	33.6667	Karepula		14.8333	33.6667	Karepula
					15.5	33.5	Gunugu		15.5	33.5	Gunugu
15.5	33.5833	Castra Germanorum			15.5	33.6667	Kap des Apollon		15.5	33.6667	Kap des Apollon
15.8333	33.6667	Kap des Apollon			15.8333	33.5833	Castra Germanorum		15.8333	33.5833	Castra Germanorum
15.6667	33.25	Kanukkis			16.1667	33.5	Kanukkis		16.1667	33.5	Kanukis
					16.6667	33.3333	Chinalaph-Mündung		16.6667	33.3333	Chinalaph-Mündung
					17	33.3333	Iol Caesarea*		17	33.3333	Iol Caesarea*
					17.5	33.5	Tipasa		17.5	33.5	Tipasa
					17.6667	33	Via		17.6667	33	Via
					18	33	Icosium		18	33	Icosium
					18.1667	33.4167	Sauos-Mündung		18.1667	33.3333	Sauos-Mündung
					18.5	32.75	Rusguniae		18.5	32.75	Rusguniae
					18.75	32.8333	Rusibikar		18.75	32.833	Rusikibar
					19.1667	32.9167	Audunga		19.167	32.917	Modunga
					19.5	32.8333	Serbes-Mündung		19.5	32.8333	Serbes-Mündung
					19.75	32.8333	Cissi		19.75	32.8333	Cissi
					20	32.8333	Addyme		20	32.8333	Addyme
					20.25	32.75	Rusuccuru		20.25	32.75	Rusuccuru
					20.5	32.75	Iomnion		20.5	32.75	Iomnion
					20.75	32.6667	Rusubisir		20.75	32.6667	Rusubisir
					21	32.6667	Rusazus		21	32.6667	Rusazus
					21.5	32.5	Uabar		21.5	32.5	Uabar
					22	32.5	Saldae*		22	32.5	Saldae*
					22.1667	32.5	Nasavath-Mündung		22.1667	32.5	Nasavath-Mündung
					22.6667	32.3333	Choba		22.6667	32.3333	Choba
					23	32.25	Sisar-Mündung		23	32.25	Sisar-Mündung
					23.3333	32.0833	Iarsath		23.3333	32.0833	Iarsath
					23.6667	32.25	Kap Audon		23.6667	32.25	Kap Audon
					23.8333	32	Audos-Mündung		23.8333	32	Audos-Mündung
					24	32	Igilgili		24	31.75	Igilgili
					24.6667	31.8333	Gulos-Mündung		24.6667	31.8333	Gulos-Mündung
					25.1667	31.75	Assarath		25.1667	31.75	Assarath
					26.25	31.75	Ampsaga-Mündung		26.25	31.75	Ampsaga-Mündung
					27	31.75	Winkel des Numidischen Golfes		27	31.75	Winkel des Numidischen Golfes
					27.3333	32.5	Chullu		27.3333	32.3333	Chullu
27.75	32.5	Rusicade			27.6667	32.5	Rusicade		27.6667	32.5	Rusicade
27.6667	32.5	Kap Treton			27.75	32.75	Kap Treton		27.75	32.75	Kap Treton
26.5	32.5	Thysikath			28.167	32.5	Thysikath		28.167	32.5	Uzikath
					28.6667	32	Holkachites-Golf		28.6667	32	Holkachites-Golf
					29	32.5	Takatye		29	32.5	Takatye
29	32	Kollops Mikros			29.3333	32.5833	Kollops Mikros		29.3333	32.5833	Kollops Mikros
					29.5	32.6667	Siur		29.6667	32.6667	Siur
					30	32.75	Hippu Akra		30	32.75	Hippu Akra
					30.6667	32.6667	Kap Stoborron		30.1667	32.6667	Kap Stoborron
					30.8333	32.6667	Aphrodision		30.3333	32.5	Aphrodision
					30.3333	32.25	Hippo Regius		30.5	32.25	Hippo Regius
					30.5	32.25	Rubricatus-Mündung		30.75	32.25	Rubricatus-Mündung
					31.25	32.3333	Thabraka*		31.25	32.3333	Thabraka*
					31.6667	32.8333	Heiligtum des Apollon		31.6667	32.8333	Heiligtum des Apollon
					32	32.75	Altäre des Poseidon		32	32.75	Altäre des Poseidon
					32.5	32.75	Hippon Diarrhytos		32.5	32.75	Hippon Diarrhytos
					33	32.5	Thinisa		33	32.5	Thinissa
					33.5	33.5	Kapdes Apollon		33.5	33.25	Kap des Apollon
					33.3333	32.75	Utica*		33.6667	32.75	Utica*
					33.6667	32.5	Lagerdes Cornelius		33.6667	32.5	Lager des Cornelius
					34	32.6667	Bagradas-Mündung		34	32.6667	Bagradas-Mündung
					34.8333	32.6667	Karchedon*		34.8333	32.6667	Karchedon*
					34.8333	32.5	Katadas-Mündung		34.8333	32.5	Katadas-Mündung
					35	32.6667	Maxula		35	32.6667	Maxula
					35	33	Carpis		35	33	Carpis
					35	33.25	Missua		35	33.1667	Missua
					35	33.3333	Clupea		35	33.3333	Clupea
					35	33.5	Kap Hermaia		35	33.5833	Kap Hermaia
					35.25	33.3333	Aspis		35.3333	33.3333	Aspis
					35.5	33.1667	Curubis		35.5	33.1667	Curubis
					35.75	33	Neapolis		35.75	33	Neapolis
					36	32.8333	Siagul		36	32.8333	Siagul
					36.5	32.6667	Aphrodision		36.25	32.6667	Aphrodision
					36.6667	32.6667	Hadrumetum*		36.6667	32.6667	Hadrumetum*
					36.8333	32.6667	Ruspina		36.8333	32.8333	Ruspina
					37.1667	32.5	Leptis Minor		37.1667	32.5833	Leptis Minor
					37.25	32.5	Thapsos		37.5	32.5	Thapsos
					37.75	32.3333	Acholla		37.75	32.75	Acholla
					38	32.3333	Ruspai		38	32.333	Ruspe
					38.5	32.3333	Kap Brachodes		38.5	32.3333	Kap Brachodes
					38.1667	32.1667	Usilla		38.1667	32.1667	Usilla
					38.5	32	Taphrura		38.5	32	Taphrura
					38.5	31.6667	Thenai		38.5	31.6667	Thenai
					38.5	31.25	Makomada		38.5	31.25	Makomada
					38.6667	30.5	Triton-Mündung		38.6667	30.75	Triton-Mündung
					38.8333	30.5	Takape		38.8333	30.5	Takape
					39.3333	30.3333	Gigthis		39.3333	30.8333	Gigthis
					40.1667	31.25	Gidaphtha		40.167	31.25	Hedaphtha
					40.6667	31.3333	Kap Zita		40.6667	31.6667	Kap Zita
					41	31.5	Sabratha		41	31.5	Sabratha
					41.25	31.5	Pisidon		41.25	31.5	Pisidon
					41.5	31.6667	Oea		41.5	31.6667	Oea
					41.75	31.6667	Garapha		41.75	31.6667	Garapha
					42	31.6667	Leptis Magna*		42	31.6667	Leptis Magna*
					42.25	31.5	Kinyps-Mündung		42.25	31.1667	Kinyps-Mündung
					42.5	31.5	Barathia		42.6667	31.1667	Barathia
43.25	31.3333	Kap Trioron			42.9167	31.3333	Kap Trioron		42.9167	31.3333	Kap Treeron
42.6667	31.3333	Kisternai			43.25	31	Kisternai		43.25	31	Kisternai
					43.6667	31	Kap Kephalai		43.6667	31	Kap Kephalai
					43.5	30.8333	Makomaka		43.5	30.75	Makomaka
					43.6667	30.3333	Aspis		43.6667	30.3333	Aspis
					43.8333	30	Zagazaena		43.9167	30	Zagazaena
					44.1667	29.6667	Euphrantas Pyrgos		44.1667	29.6667	Euphrantas Pyrgos
					44.5	29.3333	Pharaxa		44.5	29	Pharaxa
					45	29	Oisporis		45	29	Oisporis
					46	29	HippuAkra		46	29	Hippu Akra
					46.75	29	Philainu		46.75	29	Arae Philaenorum
					47.25	29.1667	Festung Automala		47.0833	29.1667	Festung Automala
					47.25	29.3333	KapDrepanon		47.25	29.3333	Kap Drepanon
					47.3333	29.6667	Hyphaloi		47.3333	29.6667	Hyphaloi
					47.25	30	Diarrhoia		47.25	30	Diarrhoia
					47.3333	30.5	Turmdes Herakles		47.3333	30.5	Turm des Herakles
					47.3333	30.8333	Festung Diachersis		47.3333	30.8333	Festung Diachersis
					47.25	31.1667	Northern Cape		47.25	31.1667	Northern Cape
					47.5	31.25	Bryon-Strand		47.5	31.25	Bryon-Strand
					47.8333	31.3333	Berenike*		47.75	31.3333	Berenike*
					48.25	31.3333	Lathon-Mündung		48.25	31.3333	Lathon-Mündung
					48.3333	31.3333	Arsinoe*		48.6667	31.3333	Arsinoe*
					49.0833	31.1667	Ptolemaïs*		49.0833	31.1667	Ptolemaïs*
					49.5	31.5	Ausigda		49.5	31.5	Ausigda
					49.5	31.6667	Aptuchu Hieron		49.5	31.6667	Aptuchu Hieron
					50	31.8333	Kapdes Phykes		50	31.8333	Kap des Phykes
					50.1667	31.6667	Apollonia*		50.1667	31.6667	Apollonia*
					50.3333	31.6667	Naustathmos		50.3333	31.6667	Naustathmos
					50.5	31.5	Erythron		50.5	31.5	Erythron
					50.75	31.3333	Chersis		50.75	31.3333	Chersis
					51	31.3333	Kap Zephyrion		51	31.3333	Kap Zephyrion
					51.25	31.25	Darnis		51.25	31.25	Darnis
					51.6667	31.25	Aziris		51.6667	31.25	Aziris
					52	31.6667	Chersonesos Megale*		52	31.6667	Chersonesos Megale*
					52.1667	31.25	Phthia		52.1667	31.25	Phthia
					52.25	31.25	Paliuros		52.25	31.25	Paliuros
					52.5	31.25	Batrachos		52.5	31.25	Batrachos
					52.75	31.25	Petra Mikra		52.75	31.25	Petra Mikra
					53.1667	31.25	Antipyrgos		53.1667	31.25	Antipyrgos
					53.5	31.1667	Skythranios		53.5	31.1667	Skythranios
					53.75	31.25	Kap Kataionion		53.75	31.3333	Kap Kataionion
					54	31.1667	Kap Ardanis		54	31.25	Kap Ardanis
					54.1667	31.1667	Petra Megale		54.1667	31.1667	Petra Megale
					54.3333	31.1667	Panormos		54.3333	31.1667	Panormos
					54.75	31.25	Katabathmos Megas		54.5	31.25	Katabathmos Megas
					55	31.1667	Ainesisphyra		55	31.1667	Ainesisphyra
					55.25	31.1667	Zytris		55.25	31.1667	Zygris
					55.5	31.1667	Chettaia		55.5	31.1667	Chettaia
					55.75	31.1667	Zagylis		55.75	31.1667	Zagylis
					56	31.5	Selinus		56	31.1667	Selinus
					56.3333	31.0833	Dorf des Trisarchos		56.3333	31.0833	Dorf des Trisarchos
					56.6667	31.0833	Apis-Heiligtum		56.6667	31.0833	Apis-Heiligtum
					57	31.1667	Paraitonion*		57	31.1667	Paraitonion*
					57.1667	31.1667	Kap Pythias		57.1667	31.1667	Kap Pythis
					57.3333	31.0833	Graias Gony		57.3333	31.0833	Graias Gony
					57.5	31.1667	Kap Kallias		57.5	31.1667	Kap Kallias
					57.6667	31.0833	Gyzis		57.6667	31.0833	Zygis
					57.8333	31.1667	Leuke Akte		57.8333	31.1667	Leuke Akte
					58	31.25	Kap Hermaia		58	31.25	Kap Hermaia
					58.3333	31.1667	Phönizischer Hafen		58.3333	31.1667	Phönizischer Hafen
					58.6667	31.0833	Antiphrai		58.6667	31.0833	Antiphrai
					58.8333	31.1667	Kap Derris		58.8333	31.4167	Kap Derris
					59	31.0833	Leukaspis		59	31.0833	Leukaspis
					59.1667	31.1667	Kap Glaukon		59.1667	31.25	Kap Glaukon
					59.5	31.0833	Chei		59.5	31.083	Cheimo
					59.75	31	Plinthine		59.75	31	Plinthine
					60	31.0833	Chersonesos Mikra		60	31.0833	Chersonesos Mikra
					60.5	31	Alexandreia*		60.5	31	Alexandreia*
					60.75	31.0833	Kanobos		60.75	31.0833	Kanobos
					60.8333	31.0833	Herakleotische Mündung		60.9167	31.0833	Herakleotische Mündung
					61.25	31.0833	Bolbitinische Mündung		61.25	31.0833	Bolbitinische Mündung
					61.5	31.0833	Sebennytische Mündung		61.5	31.0833	Sebennytische Mündung
					61.75	31.0833	Pineptimi (Pseudo-Mündung)		61.75	31.0833	Pineptimi (Pseudo-Mündung)
					62.1667	31.1667	Diolkos (Pseudo-Mündung)		62.1667	31.1667	Diolkos (Pseudo-Mündung)
					62.5	31.1667	Pathmetische Mündung		62.5	31.1667	Pathmetische Mündung
					62.75	31.1667	Mendesische Mündung		62.75	31.1667	Mendesische Mündung
					63	31.25	Tanitische Mündung		63.0833	31.25	Tanitische Mündung
					63.25	31.25	Pelusische Mündung		63.25	31.1667	Pelusische Mündung
					63.5	31.25	Pelusion*		63.3333	31.25	Pelusion*
					63.6667	31.25	Gerron (Endpunktder Kasiotis)		63.5833	31.3333	Gerron (Endpunkt der Kasiotis)
					63.8333	31.1667	Kasion		63.8333	31.25	Kasion
					64	31.1667	Sirbonis-See (Durchbruch)		63.9167	31.1667	Sirbonis-See (Durchbruch)
					64.25	31.1667	Ostrakine		64.25	31.8333	Ostrakine
					64.6667	31.8333	Rhinokorura		64.6667	31.8333	Rhinokorura
					64.8333	31.6667	Anthedon		64.8333	31.6667	Anthedon
					64.9167	31.5	Hafen der Gazaier		64.9167	31.5	Hafen der Gazaier
					65	31.6667	Askalon*		65	31.6667	Askalon*
					65.25	31.8333	Azotos		65.25	31.8333	Azotos
					65	32	Hafen der Iamniten		65	32	Hafen der Iamniten
					65.6667	32.0833	Ioppe		65.6667	32.0833	Ioppe
					66	32.25	Apollonia		66	32.25	Apollonia
					66.25	32.5	Kaisareia des Straton*		66.25	32.5	Kaisareia des Straton*
					66.3333	32.5833	Chorseas-Mündung		66.3333	32.5833	Chorseas-Mündung
					66.5	32.6667	Dora		66.5	32.6667	Dora
					66.4167	32.9167	Karmelos-Berg		66.4167	32.9167	Karmelos-Berg
					66.8333	32.8333	Sykaminon		66.8333	32.8333	Sykaminon
					66.8333	33	Ptolemaïs		66.8333	33	Ptolemaïs
					67.1667	33.25	Ekdippa		67.1667	33.25	Ekdippa
					67.1667	33.5	Sidon		67.1667	33.5	Sidon
					67.5	33.5833	Leon-Mündung		67.5	33.5833	Leon-Mündung
					67.5	33.6667	Berytos		67.5	33.6667	Berytos
					67.6667	33.75	Adonis-Mündung		67.6667	33.75	Adonis-Mündung
					67.6667	33.9167	Byblos		67.6667	33.9167	Byblos
					67.5	34.0833	Botrys		67.5	34.0833	Botrys
					67.3333	34.25	Kap Theuprosopon		67.3333	34.25	Kap Theuprosopon
					67.5	34.3333	Tripolis		67.5	34.3333	Tripolis
					67.6667	34.3333	Orthosia		67.6667	34.3333	Orthosia
					67.8333	34.3333	Simyra		67.8333	34.3333	Simyra
					68	34.4167	Eleutheros-Mündung		68	34.4167	Eleutheros-Mündung
					68.3333	34.5	Balaneai		68.3333	34.5	Balaneai
					68.3333	34.75	Paltos		68.3333	34.75	Paltos
					68.3333	34.9167	Gabala		68.3333	34.9167	Gabala
					68.5	35.0833	Laodikeia*		68.5	35.0833	Laodikeia*
					68.3333	35.1667	Herakleia		68.3333	35.1667	Herakleia
					68.5	35.25	Poseidion		68.5	35.25	Poseidion
					68.5	35.5	Orontes-Mündung		68.5	35.5	Orontes-Mündung
					68.5833	35.5833	Seleukeiavon Pierien		68.5833	35.5833	Seleukeia von Pierien
					69	35.8333	Rhosischer Felsen		69	35.8333	Rhosischer Felsen
					69.3333	35.6667	Rhosos		69.3333	35.6667	Rhosos
					69.5	35.8333	Myriandros		69.5	35.8333	Myriandros
					69.5	36.0833	Alexandreiabei Issos		69.5	36.0833	Alexandreia bei Issos
					69.5	36.3333	Grenzpunkt (Kilikien,Syrien)		69.5	36.3333	Amanos-Pforten
69.3333	36.8333	Issos			69.3333	36.4167	Issos		69.3333	36.4167	Issos
					69	36.5	Aigaiai		69	36.5	Aigai
					68.75	36.5	Serretilis		68.75	36.5	Serretilis
					68.5	36.5	Mallos*		68.5	36.5	Mallos*
					68.25	36.5	Pyramos-Mündung		68.25	36.5	Pyramos-Mündung
					68	36.5	Saros-Mündung		68	36.5	Saros-Mündung
					67.75	36.6667	Kydnos-Mündung		67.75	36.6667	Kydnos-Mündung
					67.5	36.6667	Zephyrion		67.5	36.6667	Zephyrion
					67.25	36.6667	Pompeiopolis*		67.25	36.6667	Pompeiopolis*
					67	36.75	Lamos-Mündung		67	36.75	Lamos-Mündung
					66.75	36.75	Sebaste		66.75	36.75	Sebaste
					66.5	36.8333	Korykos		66.5	36.8333	Korykos
					66.3333	36.6667	Kap Zephyrion		66.3333	36.6667	Kap Zephyrion
					66.3333	36.8333	Kalykadnos-Mündung		66.3333	36.8333	Kalykadnos-Mündung
					66.1667	36.75	Kap Sarpedon		66.1667	36.75	Kap Sarpedon
					66	36.8333	Aphrodisias		66	36.8333	Aphrodisias
					65.75	36.8333	Kelenderis		65.75	36.8333	Kelenderis
					65.5	36.8333	Arsinoe		65.5	36.8333	Arsinoe
					65.3333	36.8333	Orymagdos-Mündung		65.3333	36.8333	Orymagdos-Mündung
					65.1667	36.8333	Anemurion		65.1667	36.8333	Anemurion
					64.8333	36.5833	Nephelis		64.8333	36.5833	Nephelis
					64.6667	36.8333	Antiocheia		64.6667	36.8333	Antiocheia
					64.3333	36.75	Selinus*		64.3333	36.75	Selinus*
					64	36.75	Iotape		64	36.75	Iotape
					63.8333	36.75	Syedra		63.8333	36.75	Syedra
					63.8333	36.6667	Grenzpunkt (Kilikien,Pamphylien)
					63.5833	36.6667	Korakesion		63.5833	36.6667	Korakesion
					63.4167	36.6667	Side*		63.4167	36.6667	Side*
					63.3333	36.6667	Melas-Mündung
					63	36.9167	Eurymedon-Mündung		63	36.9167	Eurymedon-Mündung
					62.6667	36.8333	Magydos		62.6667	36.8333	Magydos
					62.8333	36.5	Kestros-Mündung		62.8333	36.5	Kestros-Mündung
36.9167	62.25	Katarraktes-Mündung			62.5	36.5833	Katarraktes-Mündung		62.5	36.5833	Katarraktes-Mündung
					62.25	36.5	Attaleia		62.25	36.5	Attaleia
36.9167	62	Olbia			62	36.5833	Olbia		62	36.5833	Olbia
					61.8333	36.5	Grenzpunkt (Lykien,Pamphylien)		61.8333	36.5	Grenzpunkt (Lykien, Pamphylien)
					61.8333	36.4167	Phaselis		61.8333	36.4167	Phaselis
					61.5833	36.25	Olympos		61.6667	36.3333	Olympos
					61.5	36.0833	Heiliges Kap		61.5	36.25	Heiliges Kap
					61.3333	36.3333	Gagai
					61.1667	36.4167	Aperlai		61.1667	36.4167	Aperlai
					61.1667	36.3333	Limyros-Mündung		61	36.3333	Limyros-Mündung
					60.75	36.4167	Andriake*		60.75	36.4167	Andriake*
					60.5	36.3333	Antiphellos		60.5	36.3333	Antiphellos
					60.5	36	Patara*		60.5	36	Patara*
					60.3333	36	Xanthos-Mündung		60.3333	36	Xanthos-Mündung
					60.1667	35.8333	Telmessos*		60.1667	35.8333	Telmessos
					60	35.9167	Daidala		60	35.9167	Daidala
					59.8333	35.9167	Krya		59.8333	35.9167	Krya
					59.6667	35.9167	Lydai		59.5833	35.8333	Lydai
					59.3333	35.9167	Kalinda		59.3333	35.9167	Kalinda
					59.1667	36	Kaunos		59.1667	36	Kaunos
					59	36.0833	Kalbis-Mündung		58.75	36.0833	Kalbis-Mündung
					58.25	36.1667	Physka		58.25	36.1667	Phuska
					58	36.1667	Phoinix		58	36	Phoinix
					57.6667	36	Kressa		57.6667	35.75	Kressa
					57.3333	35.9167	Loryma		57.3333	35.5833	Loryma
					57	35.8333	Kap Kynostema
					56.6667	35.3333	Kap Onugnathos		56.6667	35.5	Kap Onugnathos
					56.25	36	Knidos*		56.25	36	Knidos*
					57	36	Keramos		57	36	Keramos
					57.3333	36.1667	Halikarnassos		57.8333	36.1667	Halikarnassos
					57.3333	36.4167	Kap Skopias		57.3333	36.4167	Kap Skopias
					57.6667	36.4167	Myndos		57.6667	36.4167	Myndos
					57.8333	36.6667	Bargylia		57.8333	36.6667	Bargylia
					57.8333	36.8333	Iassos		57.5	36.8333	Iassos
					58	37	Miletos*		58	37	Miletos*
					58	37.0833	Latmos-Mündung
					58.8333	37.1667	Herakleia am Latmos		57.5	37.1667	Herakleia am Latmos
					57.8333	37.4167	Pyrrha		57.8333	37.4167	Pyrrha
					57.6667	37.5	Maiander-Mündung		57.6667	37.5	Maiander-Mündung
					57.1667	37.6667	Kap Trogylion		57.1667	37.6667	Kap Trogylion
					57.6667	37.6667	Ephesos*		57.6667	37.6667	Ephesos*
					57.6667	37.8333	Kaystros-Mündung		57.25	37.8333	Kaystros-Mündung
					57.6667	38.1667	Kolophon		57.6667	38	Kolophon
					57.5	38.3333	Lebedos		57.5	38.3333	Lebedos
					57.1667	38.4167	Teos		57.1667	38.25	Teos
					56.6667	38.5833	Erythrai		56.6667	38.5833	Erythrai
					57	38.5833	Klazomenai		57	38.5833	Klazomenai
57.4167	38.5833	Smyrna*			57.4167	38.6667	Kap Argennon		57.5	38.6667	Kap Argennon
57.8333	38.6667	Kap Argennon			57.8333	38.5833	Smyrna*		58.4167	38.5833	Smyrna*
					57.5	38.75	Hermos-Mündung		58.5	38.75	Hermos-Mündung
					57.5	38.8333	Phokaia		58.5	38.8333	Phokaia
					57.3333	39	Kyme		58.3333	39	Kyme
					57	39.0833	Kap Hydra		57.5	39.0833	Kap Hydra
					57.25	39.25	Myrina		57.25	39.25	Myrina
					57	39.4167	Elaia		57	39.0833	Elaia
56.5	39.75				56.5	39.25	Pitane		56.5	39.25	Pitane
					56.25	39.5	Kap Kaine		56.25	39.5	Kap Kaine
					56.1667	39.5833	Kaikos-Mündung		56.1667	39.75	Kaikos-Mündung
					56.8333	39.75	Poroselene		56.5	39.75	Poroselene
					56.5	40	Adramytion		56.5	40	Adramytion
					56.5	40.3333	Antandros		56.5	40.3333	Antandros
					56.25	40.5	Alt-Skepsis		56.25	40.5	Alt-Skepsis
					56.1667	40.6667	Garganon		56.1667	40.3333	Garganon
					56	40.75	Assos		56	40.25	Assos
									55.6667	40.4167	Kap Lekton
					55.4167	40.6667	Alexandreia Troas*		55.4167	40.6667	Alexandreia Troas*
					55.1667	41	Kap Sigeion		55.1667	41	Kap Sigeion
					55.25	41	Skamander-Mündung		55.25	41	Skamander-Mündung
					55.25	41.0833	Dardanon		55.25	41.0833	Dardanon
					55.3333	41.1667	Simoeis-Mündung		55.3333	41.1667	Simoeis-Mündung
					55.3333	41.25	Abydos		55.3333	41.25	Abydos
					55.3333	41.4167	Lampsakos		55.3333	41.4167	Lampsakos
					55.5	41.5	Grenikos-Mündung		55.5	41.5	Grenikos-Mündung
					55.75	41.5	Parion		55.75	41.5	Parion
					56	41.8333	Aisepos-Mündung		56	41.3333	Aisepos-Mündung
					56	41.5	Kyzikos*		56	41.5	Kyzikos*
					56.3333	41.75	Rhyndakos-Mündung		56.3333	41.75	Rhyndakos-Mündung
56.3333	41.9167	Apameia*			56.3333	41.9167	Apameia*		56.5833	41.9167	Daskylion
56.6667	42.0833	Daskylion			56.6667	42.0833	Daskylion		56.9167	42	Apameia*
					57.3333	42.0833	Prusias		57.3333	42.0833	Prusias
					56.75	42.25	Askanios-Mündung		56.5	42.25	Askanios-Mündung
					56.5	42.4167	Kap Poseidion		56.5	42.4167	Kap Poseidion
					57	42.5	Olbia		57	42.5	Olbia
57	42.5	Nikomedeia*			57.3333	42.5	Nikomedeia*		57.3333	42.5	Nikomedeia*
					57	42.9167	Astakos		57	42.6667	Astakos
					56.75	43	Trarion		56.75	42.75	Trarion
56.25	43.5833	Kap Akritas							56.5	42.75	Kap Akritas
					56.4167	43.0833	Chalkedon*		56.0833	43.0833	Chalkedon*
					56.4167	43.3333	Artemis-Heiligtum		56	43.3333	Artemis-Heiligtum
					56.75	43.3333	Kap Bithynia		56.75	43.3333	Kap Bithynia
					57	43.25	Artake		57	43.25	Artake
					57.25	43.0833	Psyllis-Mündung		57.25	43.25	Psyllis-Mündung
					57.6667	43	Kalpa-Mündung		57.6667	43.0833	Kalpa-Mündung
					58	42.75	Sangarios-Mündung		58	42.75	Sangarios-Mündung
58.8333	43	Hypios-Mündung			58.6667	42.75	Hypios-Mündung		58.6667	42.75	Hypios-Mündung
					58.8333	43	Elata-Mündung		58.8333	43	Elata-Mündung
					58.75	43.3333	Diospolis		58.75	43.3333	Diospolis
					59	43.5	Herakleiaam Pontos*		59	43.5	Herakleia am Pontos*
					59.5	43.5	Psylleion		59.5	43.5	Psylleion
					60	43.5	Tion		60	43.5	Tion
					60.25	43.5	Parthenios-Mündung		60.25	43.5	Parthenios-Mündung
62.5	43.5	Amastris			60.5	43.5	Amastris		60.5	43.5	Amastris
					60.75	43.75	Kromna		60.5833	43.5833	Kromna
					61	43.5833	Kytoros		60.75	43.5833	Kytoros
					61.1667	43.8333	Klimax		61.1667	43.8333	Klimax
					61.5	44	Thymaina		61.5	44	Teuthrania
					61.3333	44.4167	Kap Karambis		61.3333	44.4167	Kap Karambis
					61.5	44.25	Zephyrion		61.5	44.3333	Zephyrion
					61.75	44.0833	Kallistratia		61.75	44.25	Kallistratia
					62	44	Abunoteichos		62	44	Abunoteichos
					62.5	44	Kimolis		62.5	44	Kimolis
					62.9167	43.9167	Armene		62.9167	43.9167	Armene
					63.3333	43.9167	Stephane		63.3333	43.9167	Stephane
					63.8333	44	Sinope*		63.8333	44	Sinope*
					63.6667	43.6667	Kyptasia		63.6667	43.6667	Kyptasia
					64	43.5	Zaliskos-Mündung		64	43.5	Zaliskos-Mündung
					64.25	43.3333	Gazoron		64.25	43.3333	Gazoron
					64.5	43.1667	Halys-Mündung		64.5	43.1667	Halys-Mündung
					65	43.0833	Amisos*		65	43.0833	Amisos*
					65.5	43.1667	Grenzpunkt (Galatien,Kappadokien)		65	43.1667	Grenzpunkt (Galatien, Kappadokien)
					65.6667	43.3333	Ankon der Leukosyrer		65.6667	43.3333	Ankon der Leukosyrer
					66	43	Iris-Mündung		66	43	Iris-Mündung
					66.3333	43.0833	Themiskyra		66.3333	43.0833	Themiskyra
					66.8333	43.3333	Kap des Herakles		66.8333	43.3333	Kap des Herakles
					67	43.25	Thermodon-Mündung		67	43.25	Thermodon-Mündung
					67.25	43.0833	Polemonion		67.25	43.0833	Polemonion
					67.5	43.25	Kap Iasonion		67.5	43.25	Kap Iasonion
					67.5833	43.0833	Kotyoron		67.5833	43.0833	Kotyoron
					67.8333	43.25	Hermonassa		67.9167	43.25	Hermonassa
					68.3333	43.3333	Ischopolis		68.3333	43.3333	Ischopolis
					68.8333	43.3333	Kerasus		68.9167	43.3333	Kerasus
					69.3333	43.0833	Pharnakia		69.3333	43.0833	Pharnakia
					70.75	43.3333	Hyssos-Hafen		70.5	43.3333	Hyssos-Hafen
					70.75	43.0833	Trapezus*		70.75	43.0833	Trapezus*
					71	43.4167	Pityus		71	43.4167	Pityus
					71.1667	43.8333	Rizus		71.1667	43.5833	Rizus
					71.25	43.75	Kap Adienon		71	43.75	Kap Adienon
					71.3333	43.75	Chordyle		71.3333	43.75	Chordyle
					71.6667	43.8333	Morthula		71.6667	43.8333	Morthula
					72	44	Archabis-Mündung		71.9167	44	Archabis-Mündung
					72.0833	44.1667	Xyline		72	44.1667	Xyline
					72.3333	44.3333	Kissa-Mündung		72.0833	44.3333	Kissa-Mündung
					72.3333	44.5	Apsorros		72.1667	44.5	Apsorros
					72.6667	44.6667	Apsorros-Mündung		72.3333	44.6667	Apsorros-Mündung
					72.3333	44.75	Sebastopolis		72.3333	44.75	Sebastopolis 1
					72.5	44.75	Phasis		72.5	44.75	Phasis
					72.5	45	Phasis-Mündung		72.5	45	Phasis-Mündung
72	45.5	Chariustos-Mündung			72	45.25	Chariustos-Mündung		72	45.25	Chariustos-Mündung
					72	45.5	Aia		72	45.5	Aia
					71.5	45.6667	Neapolis		71.5	45.6667	Neapolis
					71.5	45.75	Siganeon		71.5	45.75	Siganeon
					71.5	46.1667	Kyaneos-Mündung		71.5	46.1667	Kyaneos-Mündung
					71	46.5	Hippos-Mündung		71	46.5	Hippos-Mündung
					71.1667	46.75	Dioskurias*		71.1667	46.75	Dioskurias*
					70.5	47	Korax-Mündung		70.5	47	Korax-Mündung
					70	46.8333	Karteron Teichos		70	46.8333	Karteron Teichos
					69.6667	47.3333	Thessyris-Mündung		69.6667	47	Thessyris-Mündung
					69.6667	47.25	Oinantheia*		69.6667	47.25	Oinantheia*
					69	47.25	Burkas-Mündung		69	47.25	Burkas-Mündung
					68.5	47.25	Ampsalis		68.5	47.25	Ampsalis
					68	47	Kap Toretike		68	47	Kap Toretike
					68	47.5	Lazos		68	47.5	Lazos
					67.5	47.3333	Kerketischer Golf		67.5	47.3333	Kerketischer Golf
					67	47.5	Achaia		67	47.5	Achaia
					66.6667	47.5	Psychros-Mündung		66.6667	47.5	Psychros-Mündung
					66.3333	47.5	Bata		66.3333	47.5	Bata
					66.5	47.6667	Bata		66.5	47.6667	Bata
					66	48	Sinda		66	48	Sinda
					65.5	47.8333	Sindikos		65.5	47.8333	Sindikos
					65	47.5	Hermonassa*		65	47.5	Hermonassa*
					64.25	47.5	Korokondame		64.25	47.5	Korokondame
					64.5	47.8333	Phanagoria		64.5	47.8333	Phanagoria
					64.5	48.5	Achilles-Heiligtum		64.5	48.5	Achilles-Heiligtum
					66.5	48.25	Apaturos		66.3333	48.25	Apaturos
					66.3333	48.5	Kap Kimmerion		66.5	48.5	Kap Kimmerion
					68	48.3333	Vardanes-Mündung		68	48.3333	Vardanes-Mündung
					69	48.5	Mapeta		69	48.5	Mapeta
					69.5	48.75	Psathis-Mündung		69.5	48.75	Psathis-Mündung
					70	49	Gerusa		70	49	Gerusa
					70	49.3333	Attikites-Mündung		70	49.3333	Attikites-Mündung
					69.6667	49.8333	Tyrambe*		69.6667	49.8333	Tyrambe*
					68	50	Azarabitis		68	50	Azarabitis
					69	50.5	Kleiner Rhombites (Mündung)		69	50.5	Kleiner Rhombites (Mündung)
					68.5	51.3333	Azara		68.5	51.3333	Azara
					68.5	51.6667	Theophanios-Mündung		68.5	51.6667	Theophanios-Mündung
					68.5	52	Grosser Rhombites (Mündung)		68.5	52	Grosser Rhombites (Mündung)
					68	52.5	Patarue		68	52.5	Patarue
					68	53	Marubios-Mündung		68	53	Marubios-Mündung
69.6667	53.5	Paniardis			67.5	53.5	Paniardis		67.5	53.5	Paniardis
					67	54.5	Tanaïs (östlicher Mündungsarm)		67	54.5	Tanaïs (östlicher Mündungsarm)
					66.3333	54.1667	Tanaïs (westlicher Mündungsarm)		66.3333	54.1667	Tanaïs (westlicher Mündungsarm)
					65	53.5	Karoia		65	53.5	Karoia
					64.5	53	Poritos-Mündung		64.5	53	Poritos-Mündung
					63.5	52.5	Hygreis		63.5	52.5	Hygreis
					63	51.5	Lykos-Mündung		63	51.5	Lykos-Mündung
					62.6667	51.25	Hain, Halieuma Theu		62.6667	51.25	Hain, Halieuma Theu
					62.5	50.5	Agaros-Mündung		62.5	50.5	Agaros-Mündung
					63	49.6667	Kap Agaron		63	49.6667	Kap Agaron
					62.5	49.75	Knemoi		62.5	49.75	Kneme
					61	49.8333	Gerrhos-Mündung		61	49.8333	Gerrhos-Mündung
					60.5	49.6667	Akra		60.5	49.6667	Akra
					60.3333	49.5	Bykes-Mündung		60.3333	49.5	Bykes-Mündung
					60	49.25	Leianon		60	49.25	Leianon
					60.3333	48.8333	Pasiakes-Mündung		60.3333	48.8333	Pasiakes-Mündung
					60.5	48.6667	Neue Festung		60.5	48.6667	Neue Festung
					60.5	48.5	Endpunkt beim See Byke		60.5	48.5	Endpunkt beim See Byke
					62	48.5	Herakleion		62	48.5	Herakleion
					63	48.75	Zenons Chersonesos		63	48.75	Zenons Chersonesos
					63.75	48.25	Parthenion		63.5	48.5	Parthenion
					64	48.1667	Kap Myrmekion		64	48.5	Kap Myrmekion
					64	47.9167	Pantikapaia*		64	47.9167	Pantikapaia*
					63.8333	47.6667	Tyriktake		63.5	47.6667	Tyriktake
					63.75	47.5	Nymphaion		63.75	47.5	Nymphaion
					63.3333	47.3333	Theodosia*		63.3333	47.3333	Theodosia*
					63.5	47.1667	Istrianos-Mündung		63.5	47.1667	Istrianos-Mündung
					63	47	Kap Korax		63	47	Kap Korax
					62.5	47	Lagyra		62.5	47	Lagyra
					62.3333	46.8333	Charax		62	46.8333	Charax
					62	46.6667	Kap Kriu Metopon		62	46.6667	Kap Kriu Metopon
					61.75	47.25	Argoda		61.75	47.25	Argoda
					61.25	47.1667	Ktenus		61.25	47.0833	Ktenus
					61	47	Chersonesos		61	47	Chersonesos
					60.6667	47	Kap Parthenion		60.6667	47	Kap Parthenion
					61	47.25	Symbolon		61	47.25	Symbolon
					60.75	47.3333	Dandake		60.75	47.3333	Dandake
					60.75	47.6667	Eupatoria		60.75	47.6667	Eupatoria
					60.3333	48.3333	Endpunkt bei der Bucht von Karkina		60.3333	48.3333	Endpunkt bei der Bucht von Karkina
					59.6667	48.5	Karkinites-Mündung		59.6667	48.5	Karkinites-Mündung
					59.3333	48.5	Tamyrake*		59.3333	48.5	Tamyrake*
					59.5	48	Schöner Hafen		59.5	48	Schöner Hafen
					59.75	47.8333	Kephalonesos		59.75	47.8333	Kephalonesos
					59.75	47.5	Kap Mysaris (östliches Kap des Dromos des Achill)		59.75	47.5	Kap Misaris (östliches Kap des Dromos des Achill)
					57.8333	47.5	Heiliges Kap (westliches Kap des Dromosdes Achill)		57.8333	47.5	Heiliges Kap (westliches Kap des Dromos des Achill)
					59	47.6667	Landenge des Dromos des Achill		59	47.6667	Landenge des Dromos des Achill
					58.5	47.75	Hekate-Hain		58.5	47.75	Hekate-Hain
					58	48.5	Hypanis-Mündung		58	48.5	Hypanis-Mündung
					57.5	48.5	Borysthenes-Mündung		57.5	48.5	Borysthenes-Mündung
					57	48	Axiakes-Mündung		57	48	Axiakes-Mündung
					56.5	47.6667	Physke		56	47.6667	Physke
					56.6667	47.6667	Tyras-Mündung		56.3333	47.6667	Tyras-Mündung
					56.25	47.5	Dorf des Hermonax		56.25	47.5	Dorf des Hermonax
					56	47.25	Harpis		56	47.25	Harpis
					56.25	47	Psilon (Mündung)		56.25	47	Psilon (Mündung)
					56	46.8333	Nördliche Mündung		56.3333	46.8333	Nördliche Mündung
					56.25	46.6667	Pseudostomion (Mündung)		56.25	46.667	Pseudostomon
					56.25	46.5	Schöne Mündung		56.25	46.5	Schöne Mündung
					56.5	46.4167	Narakion-Mündung		56.5	46.3333	Narakion-Mündung
					56	46.0833	Heilige Mündung		56	46.25	Heilige Mündung
					56.3333	46	Kap Pteroton		56.3333	46	Kap Pteron
					55.6667	46	Histria		55.6667	46	Histria
					55	45.8333	Tomi		55	45.8333	Tomi
					54.6667	45.5	Callatis		54.6667	45.5	Callatis
					54.6667	45.25	Dionysopolis		54.3333	45.25	Dionysopolis
					55	45.1667	Kap Tiristis		55	45.1667	Kap Tiristis
					54.8333	45	Odessus*		54.8333	45	Odessus*
					54.75	44.8333	Panysus-Mündung		54.5	44.75	Panysus-Mündung
					55	44.6667	Endpunkt beim Pontus		55	44.6667	Endpunkt bei Thrakien
					54.75	44.5	Anchialos		54.75	44.5	Anchialos
					54.75	44.25	Apollonia* Pontike		54.8333	44.3333	Apollonia* Pontike
					55	44.5	Tonzos-Mündung		55	44.5	Tonzu-Mündung
					55.1667	44	Perontikon		55.1667	44	Perontikon
					55.6667	44	Kap Thynias		55.6667	44	Kap Thynias
					55.3333	43.6667	Strand von Halmydessos		55.3333	43.6667	Strand von Halmydessos
					55.5	43.5	Kap Philia		55.5833	43.5	Kap Philia
					55.5	43.3333	Phinopolis		55.5	43.3333	Phinopolis
					56	43.0833	Byzanz*		56	43.0833	Byzanz*
					55.5	43	Bathynias-Mündung		55.5	43	Bathynias-Mündung
					55.5	42.9167	Athyras-Mündung		55.5	42.9167	Athyras-Mündung
					55	42.5	Selymbria		55	42.5	Selymbria
					54.8333	42.3333	Herakleia*		54.8333	42.3333	Perinthos oder Herakleia*
					54.8333	42.1667	Arzos-Mündung		54.8333	42.1667	Arzos-Mündung
					54.6667	42	Bisanthe		54.6667	42	Bisanthe
					54.5	41.9167	Lange Mauer		54.8333	41.8333	Lange Mauer
					54.5	41.75	Paktye		54.5	41.75	Paktye
					54.5	41.5	Grenzpunkt der Thrakischen Chersonesan der Propontis		54.3333	41.5	Grenzpunkt der Thrakischen Chersones an der Propontis
					55	41.5	Kallipolis		55	41.5	Kallipolis
					54.9167	41.25	Sestos*		54.9167	41.25	Sestos*
					54.9167	41	Koila		54.9167	41	Koila
					54.6667	40.75	Kap gleich daneben		54.6667	40.75	Kap gleich daneben
					54.5	40.75	Elaius*		54.5	40.75	Elaius*
					54.3333	40.6667	Mastusia		54.5	40.6667	Mastusia
					54.1667	41.0833	Kardiapolis		54	41.0833	Kardiapolis
					53.75	41.5	Grenzpunkt der Thrakischen Chersonesam Schwarzen Golf		53.8333	41.5	Grenzpunkt der Thrakischen Chersones am Schwarzen Golf
					53.5	41.5	Mündung des Schwarzen Flusses		53.5	41.5	Mündung des Schwarzen Flusses
					53.25	41.3333	Breites Kap		53.25	41.3333	Breites Kap
					53.1667	41.5	Ainos*		53.1667	41.5	Ainos*
					53	41.5	Hebros-Mündung		53	41.5	Hebros-Mündung
					52.6667	41.6667	Maroneia		52.6667	41.6667	Maroneia
					52.1667	41.75	Abdera		52.1667	41.75	Abdera
					51.75	41.6667	Nessos		51.75	41.75	Nessos-Mündung
					51.25	41.75	Neapolis		51.25	41.6667	Neapolis
					50.8333	41.75	Oisyme		50.8333	41.5	Oisyme
					50.25	41.4167	Strymon-Mündung		50.25	41.4167	Strymon-Mündung
					50.1667	41.3333	Arethusa		50.1667	41.25	Arethusa
					50.3333	41.1667	Stageira		50.3333	41.1667	Stageira
					50.6667	41	Panormos		50.6667	41	Panormos
					51.25	41.25	Athos		51	41.1667	Athos
					51.25	41.25	Athos		51.25	41.25	Athos
					51.1667	40.75	Kap Nymphaion		51.1667	40.75	Kap Nymphaion
					50.9167	40.9167	Stratonike		50.9167	40.9167	Stratonike
					50.6667	40.9167	Akanthos		50.6667	40.8333	Akanthos
					50.3333	40.6667	Singos		50.5	40.6667	Singos
					51.25	40.5	Kap Ampelos		51.25	40.5	Kap Ampelos
					51.25	40.3333	Kap Derris		51.25	40.3333	Kap Derris
					50.75	40.4167	Torone		50.75	40.4167	Torone
					50.6667	40.3333	Toronischer Golf (innerster Punkt)		50.6667	40.3333	Toronischer Golf (innerster Punkt)
					51	40.0833	Pallene (Landenge der Halbinsel)		51	40.0833	Pallene (Landenge der Halbinsel)
					51.25	39.9167	Kap Kanastraion		51.25	39.9167	Kap Kanastraion
					51.0833	40	Kasandreia		51.0833	40	Kasandreia*
					50.6667	40.1667	Chabrios-Mündung		50.6667	40	Chabrios-Mündung
					50.5	40.0833	Kap Gigonis		50.5	40	Kap Gigonis
					49.8333	40.3333	Thessalonike*		49.8333	40.3333	Thessalonike*
					49.75	40.25	Echeduros-Mündung		49.75	40.25	Echedoros-Mündung
					49.6667	40.1667	Axios-Mündung		49.6667	40.1667	Axios-Mündung
					49.5	40	Lydias-Mündung		49.5	40	Lydias-Mündung
					49.6667	39.75	Pydna		49.6667	39.75	Pydna
					49.8333	39.6667	Haliakmon-Mündung		49.8333	39.6667	Haliakmon-Mündung
					50	39.5833	Dion		50	39.5833	Dion
					50.1667	39.5	Baphyras-Mündung		50.1667	39.5	Baphyras-Mündung
					50.5	39.4167	Peneios-Mündung		50.5	39.4167	Peneios-Mündung
					51.3333	39.6667	Kap Magnesia		51.6667	39.5	Kap Magnesia
					51.75	39.25	Kap Rhiaia		51.8333	39.25	Kap Sepias
					51.3333	39.25	Aiantion		51.6667	39.25	Aiantion
					51.1667	39.25	Iolkos		51.5	39.25	Iolkos
					50.8333	38.9167	Pagasai		50.8333	38.9167	Pagasai
					51	38.9167	Demetrias		50.5	38.9167	Demetrias
					50.75	38.8333	Eretriai		51	38.8333	Eretriai
					51.5	38.8333	Kap Poseidion		51.5	38.8333	Kap Poseidion
					51.3333	38.8333	Larissa Kremaste		51.3333	38.8333	Larissa Kremaste
					51.1667	38.75	Echinos		51.1667	38.75	Echinos
					51	38.6667	Spercheia		51.3333	38.5833	Spercheia
					51	38.5833	Theben in der Phthiotis		51.1667	38.5833	Theben in der Phthiotis
					51	38.5	Spercheios-Mündung		51	38.5	Spercheios-Mündung
					51	38.4167	Malischer Golf		51	38.4167	Malischer Golf
					51.25	38.4167	Skarpheia		51.25	38.4167	Skarpheia
					51.5	38.4167	Boagrios-Mündung		51.5	38.4167	Boagrios-Mündung
					52	38.3333	Kynos		52	38.3333	Kynos
					52.1667	38.4167	Knemides		52.1667	38.4167	Knemides
					52.25	38.1667	Oitäischer Golf (innerster Punkt)		52.25	38.1667	Oitäischer Golf (innerster Punkt)
					52.6667	38.1667	Phokai		52.6667	38.1667	Phokai
					53	38.0833	Anthedon		53	38.1667	Anthedon
					53.0833	38	Salganeus		53	38	Salganeus
					53.1667	37.8333	Ismenos-Mündung		53.1667	37.8333	Ismenos-Mündung
					53.25	37.75	Aulis		53.25	37.75	Aulis
					53.3333	37.6667	Oropos		53.3333	37.6667	Oropos
					53.5	37.5833	Chersonesos		53.5	37.5	Chersonesos
					53.5	37.4167	Asopos-Mündung		53.5	37.4167	Asopos-Mündung
					53.8333	37.3333	Kap Kynosura		53.8333	37.3333	Kap Kynosura
					53.6667	37.0833	Artemis-Heiligtum		53.6667	37.0833	Artemis-Heiligtum
					53.6667	37	Panormos		53.6667	37	Panormos
					53.5833	36.75	Kap Sunion		53.5833	36.75	Kap Sunion
					53.5	36.8333	Hyphormos		53.5	36.8333	Hyphormos
					53.25	37	Munychia		53.25	37	Munychia
					52.8333	37.0833	Ilissos-Mündung		52.9167	37.0833	Ilissos-Mündung
					52.75	37.1667	Peiraieus		52.75	37.1667	Peiraieus
					52.3333	37.25	Eleusis		52.3333	37.25	Eleusis
					52	37.3333	Megara		52	37.3333	Megara
					51.6667	37	Schoinus		51.3333	37	Schoinus
					51.4167	36.9167	Kenchreai		51.4167	36.9167	Kenchreai
					51.4167	36.75	Bukephalon		51.4167	36.75	Bukephalon
					51.5	36.5833	Hafen der Athener		51.5	36.5833	Hafen der Athener
					51.75	36.5	Kap Speiraion		51.75	36.5	Kap Speiraion
					51.8333	36.4167	Epidauros		51.8333	36.4167	Epidauros
					52.1667	36.3333	Methana		52.1667	36.3333	Methana
					52.3333	36.0833	Troizen		52.3333	36.0833	Troizen
					52.5	36.0833	Kap Skyllaion		52.5	36.0833	Kap Skyllaion
					52	36	Hermione		52	36	Hermione
					51.75	35.9167	Phlius		51.75	35.9167	Phlius
					51.5833	36	Nauplia		51.5833	36.0833	Nauplia
					51.5	35.75	Inachos-Mündung		51.5	35.8333	Inachos-Mündung
									51.5	35.75	Astron
					51.3333	35.8333	Prasia		51.3333	35.8333	Prasia
					51.1667	35.75	Kyphanta		51.1667	35.75	Kyphanta
					51	35.6667	Zarex		51	35.6667	Zarex
					51.0833	35.5	Epidauros Limera		51.0833	35.5	Epidauros Limera
					51.1667	35.25	Hafen des Zeus Soter		51.1667	35.25	Hafen des Zeus Soter
					51.1667	35.1667	Minoa		51.1667	35.1667	Minoa
					51.3333	35	Kap Malea		51.3333	35	Kap Malea
					51	35.0833	Boai		51.0833	35.0833	Boai
					51	35	Kap Onugnathos		51	35	Kap Onugnathos
					50.8333	35.0833	Asopos		50.8333	35.0833	Asopos
					50.75	35.1667	Biandyna		50.75	35.1667	Biandyna
					50.5833	35.1667	Akreia		50.5833	35.1667	Akreia
					50.5	35.1667	Eurotas-Mündung		50.5	35.1667	Eurotas-Mündung
					50.4167	35.1667	Trinassos		50.4167	35.1667	Trinassos
					50.3333	35.0833	Gythion		50.3333	35.0833	Gythion
					50.25	35	Las		50.25	35	Las
					50.1667	34.9167	Teuthrone		50.1667	34.9167	Teuthrone
					50.0833	34.8333	Kaine		50.0833	34.8333	Kaine
					50	34.75	Tainarion		50	34.75	Tainarion
					50	34.3333	Kap Tainaria		50	34.3333	Kap Tainaria
					49.9167	34.8333	Leuktron		49.8333	34.6667	Leuktron
					49.75	35.1667	Abea		49.75	35.1667	Abea
					49.5	35.25	Pherai		49.5	35.25	Pherai
					49.3333	35.25	Pamisos-Mündung		49.3333	35.25	Pamisos-Mündung
					49.25	35.25	Messene*		49.25	35.25	Messene*
					49	35.0833	Korone		49	35.0833	Korone
					48.8333	35	Asine		48.8333	35	Asine
					48.5	35	Kap Akritas		48.5	35	Kap Akritas
					48.75	35.25	Kolone		48.75	35.25	Kolone
					48.5833	35.3333	Methone		48.5833	35.3333	Methone
					48.5	35.4167	Kap Koryphasion		48.5	35.4167	Kap Koryphasion
					48.5833	35.5	Pylos		48.5833	35.5	Pylos
					48.5	35.5833	Selas-Mündung		48.5	35.5833	Selas-Mündung
					48.4167	35.6667	Kap Kyparission		48.4167	35.6667	Kap Kyparission
									48.5833	35.75	Kyparissia
					48.3333	35.9167	Alpheios-Mündung		48.3333	35.9167	Alpheios-Mündung
					48.0833	36	Kap Ichthys		48.0833	36	Kap Ichthys
									48.3333	36.25	Chelonischer Golf
					48	36.3333	Kap Chelonitis		48	36.3333	Kap Chelonitis
					48.3333	36.5	Peneios-Mündung		48.3333	36.5	Peneios-Mündung
					48.5	36.5	Kyllene		48.5	36.5	Kyllene
					48.5	36.75	Kap Araxos		48.5	36.75	Kap Araxos
					48.6667	36.6667	Dyme		48.6667	36.6667	Dyme
					48.8333	36.75	Olenos		48.8333	36.75	Olenos
					49	36.8333	Patrai		49	36.8333	Patrai
					49.25	37	Poseidon-Heiligtum		49.25	37	Poseidon-Heiligtum
					49.3333	37.1667	Kap Drepanon		49.3333	37.1667	Kap Drepanon
					49.5	36.9167	Erineos		49.5	36.9167	Erineos
					49.75	36.9167	Aigion		49.75	36.9167	Aigion
					50.25	36.9167	Aigeira		50.25	36.9167	Aigeira
					50.6667	37	Sys-Mündung		50.6667	37	Sys-Mündung
					51.0833	36.9167	Asopos-Mündung		51.0833	37.0833	Asopos-Mündung
					51.3333	37.0833	Lechaion		51.25	37	Lechaion
					51.25	37.25	Hera-Heiligtum in der Korinthia		51.25	37.25	Hera-Heiligtum in der Korinthia
					51.4167	37.4167	Pegai		51.4167	37.4167	Pegai
					51.25	37.5	Kreusa		51.25	37.5	Kreusa
					51.0833	37.5833	Siphai		51	37.5833	Siphai
					50.5	37.5	Antikyra		50.5	37.5	Antikyra
					50.25	37.5	Krisa		50.25	37.5	Krisa
					50	37.5	Kirrha		50	37.5	Kirrha
					49.9167	37.8333	Chaleos		49.9167	37.8333	Chaleos
					49.75	37.75	Euanthia		49.75	37.75	Euanthia
					49.5	37.5833	Naupaktos		49.5	37.5833	Naupaktos
					49.3333	37.4167	Kap Antirrhion		49.3333	37.4167	Kap Antirrhion
					49	37.5	Euenos-Mündung		49	37.5	Euenos-Mündung
					48.5	37.4167	Chersonesos		48.5	37.4167	einer Kap
					48.4167	37.5	Acheloos-Mündung		48.4167	37.5	Acheloos-Mündung
					48.3333	37.5833	Alyzeia		48.3333	37.4167	Alyzeia
					47.8333	37.6667	Kap Leukas		48.1667	37.3333	Kap Leukas
					48.6667	37.75	Aktion		48.3333	37.75	Aktion
					48	38.3333	Ambrakia*		48	38.3333	Ambrakia*
					47.8333	38.25	Arachthos-Mündung		47.8333	38.25	Arachthos-Mündung
					47.4167	37.9167	Nikopolis* am Ambrakischen Golf		47.5833	37.9167	Nikopolis* am Ambrakischen Golf
					47.25	37.9167	Hafen von Elaia		47.25	37.8333	Hafen von Elaia
					47.1667	38	Acheron-Mündung		47.1667	38	Acheron-Mündung
					46.8333	38	Sybota		46,0,91666667	38	Sybota
					46.75	38	Torone		46.75	38	Torone
					46.75	38.0833	Thyamis-Mündung		46.5	38.0833	Thyamis-Mündung
					46.1667	38	Kap Thyamis		46.1667	38	Kap Thyamis
					46.1667	38.3333	Schlammhafen		46.1667	38.1667	Schlammhafen
					45.8333	38.3333	Buthroton		45.8333	38	Buthroton
					45.75	38.1667	Kap Poseidion		45.75	37.9167	Kap Poseidion
					45.5	38.4167	Kassiope		45.5	38.4167	Kassiope
					45.3333	38.5833	Onchesmos		45.3333	38.5833	Onchesmos
					45	38.6667	Panormos		45	38.6667	Panormos
					44.4167	39.1667	Akrokeraunische Berge (Spitze)		44.4167	39.1667	Akrokeraunische Berge (Spitze)
					45	39.25	Orikon		45	39.1667	Orikon
					45	39.3333	Kelydnos-Mündung		45	39.3333	Kelydnos-Mündung
					44.9167	39.5	Amantia		44.9167	39.5	Amantia
					45	39.75	Bullis		45	39.75	Bullis
					44.8333	39.9167	Aulon		44.8333	39.9167	Aulon
					45	40	Aoos-Mündung		45	40	Aoos-Mündung
					45.0833	40.1667	Apollonia		45.0833	40.1667	Apollonia
					45.0833	40.5	Apsos-Mündung		45.0833	40.5	Apsos-Mündung
					45	40.6667	Panusos-Mündung		45	40.667	Panyasos-Mündung
					45	40.9167	Dyrrhachion*		45	40.8333	Dyrrhachion*
					45	41	Illyricum (südlicher Endpunkt an der Adria)		45	41	Illyricum (südlicher Endpunkt an der Adria)
					45	41.1667	Lissus		45	41.1667	Lissus
					45	41.3333	Drilon-Mündung		45	41.3333	Drilon-Mündung
					45	41.6667	Ulcinium		45	41.5	Ulcinium
					45	41.75	Butua		45	41.75	Butua
					45	42	Golf von Rhizon		45	42	Golf von Rhizon
					44.75	42	Acruvium		44.75	42	Acruvium
					44.6667	42.25	Risinum		44.6667	42.25	Risinum
					44.6667	42.3333	Epidaurum		44.6667	42.3333	Epidaurum
					44.5	42.3333	Naro-Mündung		44.5	42.3333	Naro-Mündung
					44	42.5	Oneum		44	42.5	Oneum
					44	42.75	Pituntium		44	42.75	Pituntium
					43.6667	43.3333	Epetium		43.6667	43	Epetium
					43.5	43.1667	Salonae*		43.3333	43.1667	Salonae*
					43	43.3333	Sicun		43	43.3333	Sicun
					42.6667	43.5	Scardona		42.6667	43.5	Scardona
					42.3333	43.6667	Titus-Mündung		42.3333	43.1667	Titus-Mündung
					42	43.75	Iader*		42	43.75	Iader*
					41.5	44	Aenona		41.5	44	Aenona
					41.1667	44	Corinium		41.1667	44	Corinium
					40.75	44.1667	Argyruntum		40.75	44.1667	Argyruntum
					40.3333	44.5	Vegium		40.3333	44.5	Vegium
					40	44.5	Ortopla		40	44.5	Ortopla
					39.3333	44.5	Tedmeius-Mündung		39.333	44.5	Tidavius-Mündung
					39.25	44.6667	Lopsica		39.25	44.6667	Lopsica
					39	44.6667	Senia		39	44.6667	Senia
					38.5	44.8333	Volcera		38.5	44.75	Volcera
					38	44.75	Oineus-Mündung		38	44.75	Oineus-Mündung
					37.6667	44.8333	Tarsatica		37.6667	44.5833	Tarsatica
					37	44.8333	Flanona		37	44.75	Flanona
					36.8333	44.8333	Alvona		36.8333	45	Alvona
					36.5	44.8333	Illyricum (westlicher Endpunkt an der Adria)		36.5	44.8333	Illyricum (westlicher Endpunkt an der Adria)
					36.25	44.9167	Nesactum (Ende Italiens)		36.25	44.9167	Nesactum (Ende Italiens)
					36	44.6667	Pola		36	44.6667	Pola
					35.5	44.9167	Parentium		35.3333	44.9167	Parentium
					35	44.9167	Formio-Mündung		35	44.9167	Formio-Mündung
					34.5	44.9167	Tergeste		34.5	44.9167	Tergeste
					34	44.8333	Natiso-Mündung		34	44.8333	Natiso-Mündung
					33	44.6667	Tiliaventum-Mündung		33	44.8333	Tiliaventum-Mündung
					34	44.1667	Atrianus-Mündung		34	44.5	Atrianus-Mündung
					34.75	44	Padus-Mündung		34.75	44	Padus-Mündung
					34.6667	44	Ravenna*		34.6667	44	Ravenna*
					34.9167	43.9167	Rubico-Mündung		34.9167	43.8333	Rubico-Mündung
					35	43.8333	Ariminum		35	43.8333	Ariminum
					35.3333	43.75	Pisaurum		35.3333	43.75	Pisaurum
					35.6667	43.75	Fanum Fortunae		35.6667	43.75	Fanum Fortunae
					36	43.6667	Sena Gallica		36	43.6667	Sena Gallica
					36.3333	43.6667	Aesis-Mündung		36.3333	43.6667	Aesis-Mündung
					36.5	43.6667	Ancona*		36.5	43.6667	Ancona*
					36.8333	43.3333	Numana		36.8333	43.3333	Numana
					37.25	43.3333	Potentia		37.25	43.1667	Potentia
					37.6667	43.3333	Truentus-Mündung		37.6667	43.3333	Truentus-Mündung
					38	43.1667	Cupra Maritima		38	43.5	Cupra Maritima
					38.5	43	Castrum		38.5	43	Castrum
					39.3333	42.75	Batrinus-Mündung		39.33	42.75	Matrinus-Mündung
					40.5	42.5	Aternus-Mündung		40.5	42.5	Aternus-Mündung
					40.75	42.25	Ortona		40.75	42.25	Ortona
					41.3333	42	Sagrus-Mündung		41.3333	42	Sagrus-Mündung
					41.5	41.75	Histonium		41.1667	41.75	Histonium
					41.6667	41.6667	Buca		41.6667	41.6667	Buca
					42	41.5	Tifernus-Mündung		42	41.5	Tifernus-Mündung
					42.1667	41.25	Uria		42.5	41.25	Uria
					42.3333	41	Garganus		42.3333	41	Garganus
					42.3333	40.75	Apenesteum		42.8333	40.75	Apeneste
					42.3333	40.5	Sipontum		42.8333	40.5	Sipontum
					42.3333	40.3333	Salpia		42.8333	40.3333	Salpia
					42.5	40.25	Aufidus-Mündung		42.5	40.25	Aufidus-Mündung
					42.3333	40.0833	Barium		42.5	40.0833	Barium
					42.5	39.8333	Egnatia		42.5	39.8333	Egnatia
					42.5	39.6667	Brundisium*		42.5	39.6667	Brundisium*
					42.6667	39.25	Lupiae		42.6667	39.5	Lupiae
43	39.5833	Hydruntum			43	39.0833	Hydruntum		43	39.0833	Hydruntum
					42.3333	38.75	Kap Iapygia		42.3333	38.75	Kap Iapygia
									42.1932	39.2595	technical point
42.1667	40	Tarentum			41.5	40	Taras (Kanon poleis episemoi)		42.1667	40	Tarentum
41.9167	39.9167	Metapontum							41.9167	39.9167	Metapontum
41.9167	39.5	Thurii							41.9167	39.5	Thurii
					41.5	39.1667	Croto		41.5	39.1667	Croto
					41.5	38.75	Kap Lacinium		41.5	38.75	Kap Lacinium
					40.75	38.8333	Golf von Scolacium (innerster Punkt)		40.75	38.75	Golf von Scolacium (innerster Punkt)
					40.75	38.75	Scolacium
					40.8333	38.4167	Locanus-Mündung		40.9167	38.5833	Locanus-Mündung
					40.75	38.4167	Locri		40.8333	38.4167	Locri
					40.5	38.0833	Kap Zephyrion		40.75	38.4167	Kap Zephyrion
					39.8333	38	Kap Leukopetra		39.8333	38	Kap Leukopetra
					39.8333	38.25	Regium Iulium		39.8333	38.25	Regium Iulium
					39.75	38.3333	Kap Skylla		39.6667	38.3333	Kap Skylla
					40.3333	38.75	Golf von Hippo
					40.3333	38.8333	Taurische Klippe		40.3333	38.75	Taurische Klippe
					40	39.1667	Tempsa		40	39	Tempsa
					40	39.25	Laus-Mündung		40	39.25	Laus-Mündung
					40	39.5	Buxentum		40	39.5	Buxentum
					40.3333	39.75	Velia		40.3333	39.75	Velia
					40.1667	40	Paestum		40.1667	40	Paestum
					40.0833	40.25	Silerus-Mündung		40.0833	40.25	Silerus-Mündung
					40	40.5	Salernum		40	40.3333	Salernum
					40	40.6667	Surrentum		40.1667	40.6667	Surrentum
					40.0833	40.9167	Sarnus-Mündung		40.0833	40.9167	Sarnus-Mündung
					40	40.9167	Neapolis*		40	40.5	Neapolis*
					39.8333	41	Puteoli		39.8333	41	Puteoli
					39.5	41	Misenum
					39.3333	41.1667	Cumae		39.5	41.5	Liternum
					39.1667	41.1667	Liternum		39.3333	41.5	Cumae
					38.75	41.0833	Volturnum		38.75	41.0833	Volturnum
					38.5	41.3333	Sinuessa		38.5	41.33	Sinuessa
					38.3333	41.25	Liris-Mündung		38.3333	41.25	Liris-Mündung
					38.1667	41.25	Formiae		38.1667	41.25	Formiae
37.5	41.25	Tarracinae*			37.75	41.25	Tarracinae*		37.75	41.25	Tarracinae*
37.5	41.3333	Kap Kirke			37.5	41.1667	Kap Kirke		37.5	41.1667	Kap Kirke
					37.1667	41.3333	Clostra		37.1667	41.3333	Clostra
					36.8333	41.3333	Antium		36.8333	41.3333	Antium
					36.5	41.5	Ostia		36.5	41.5	Ostia
					36.3333	41.5	Tiberis-Mündung
					36.25	41.5	Alsium		36.25	41.6667	Alsium
					36	41.5	Pyrgi		36	41.6667	Pyrgi
					35.6667	41.6667	Castrum Novum		35.6667	41.6667	Castrum Novum
					35.3333	41.75	Graviscae		35.3333	41.75	Graviscae
					35	41.9167	Cosa		35	41.9167	Cosa
					34.5	42	Osa-Mündung		34.5	42	Osa-Mündung
					34.25	42	Kap Telamo		34.25	42	Kap Telamo
					34.1667	42.5	Trajans-Hafen		34	42.5	Trajans-Hafen
					33.8333	42.3333	Kap Populonium		33.5	42	Kap Populonium
					33.5	42.5	Populonium		33.5	42.5	Populonium
					33.3333	42.6667	Arnus-Mündung		33.3333	42.6667	Arnus-Mündung
					32.6667	42.75	Hercules-Heiligtum		32.6667	42.75	Hercules-Heiligtum
					32	42.6667	Kap Luna		32	42.6667	Kap Luna
					32	42.75	Luna		31.75	42.75	Luna
					30.8333	42.75	Macra-Mündung		30.75	42.75	Macra-Mündung
					30.5	42.9167	Tigullia		30.5833	42.9167	Tigullia
					30.5	42.8333	Entella-Mündung		30.5	42.8333	Entella-Mündung
					30	42.8333	Genua		30	42.8333	Genua
					29.5	42.75	Albingaunum		29.5	42.75	Albingaunum
					29.1667	42.75	Albintimilium		29.1667	42.75	Albintimilium
					28.6667	42.6667	Monoeci Portus		28.6667	42.6667	Monoeci Portus
					28.5	42.5	Tropaea Augusti		28.5	42.5	Tropaea Augusti
					28.25	42.75	Hercules-Hafen		28.25	42.75	Hercules-Hafen
					28	43.4167	Nicaea*		28	43.4167	Nicaea*
					27.5	43	Varus-Mündung		27.5	43	Varus-Mündung
					27	43	Antipolis		27	43	Antipolis
					26.5	42.8333	Forum Iulii		26.5	42.8333	Forum Iulii
					25.6667	42.75	Argenteus-Mündung		25.6667	42.75	Argenteus-Mündung
					25.1667	42.75	Olbia		25.5	42.75	Olbia
					25	42.6667	Kap Citharistes		25	42.5	Kap Citharistes
					24.6667	42.8333	Tauroentium		24.8333	42.8333	Tauroentium
					24.5	43.0833	Massilia*		24.5	43.0833	Massilia*
					23.75	43	Caenua-Mündung		23.75	43	Caenus-Mündung
					23.5	43.0833	Maritima		23.1667	43	Maritima
					23	42.8333	Rhodanus-Mündung(östliche)		23	42.3333	Rhodanus-Mündung (östliche)
					22.8333	42.6667	Rhodanus-Mündung(westliche)		22.8333	42.5	Rhodanus-Mündung (westliche)
					22.6667	42.6667	Fossae Marianae		22.75	42.6667	Fossae Marianae
					22.5	42.5	Setius		22.5	42.5	Setius
					22.25	42.8333	Agatha		22.25	42.8333	Agatha
					22	42.8333	Arauris-Mündung		22	42.8333	Arauris-Mündung
					21.75	42.75	Orobis-Mündung		21.75	42.75	Orobis-Mündung
					21.5	42.75	Atax-Mündung		21.5	42.75	Atax-Mündung
					21.25	42.75	Ruscino-Mündung		21.25	42.75	Ruscino-Mündung
					21	42.6667	Illiberis-Mündung		21	42.6667	Illiberis-Mündung
					20.3333	42.3333	Heiligtum der Venus		20.3333	42.3333	Heiligtum der Venus
					19.5	42.5	Rhode		19.5	42.5	Rhode
					19	42.5	Clodianus-Mündung		19	42.5	Clodianus-Mündung
					18.75	42.3333	Emporiae		18.75	42.3333	Emporiae
					18.5	42.1667	Sambroca-Mündung		18.5	42.1667	Sambroca-Mündung
					18.25	42	Blanda		18.25	42	Blanda
					18	41.75	Iluro		18	41.75	Iluro
					18.5	41.3333	Kap Lunarium		18.5	41.5	Kap Lunarium
					17.8333	41.3333	Baetulo		17.8333	41.3333	Baetulo
					17.5	41.25	Rubricatus-Mündung		17.5	41	Rubricatus-Mündung
					17.25	41	Barcino		17.25	41	Barcino
					16.8333	40.75	Subur		16.8333	40.75	Subur
					16.3333	40.6667	Tarraco*		16.3333	40.6667	Tarraco*
					16	40.5	Iberus-Mündung		16	40.5	Iberus-Mündung
					15.5	40	Tenebrius-Hafen		15.5	40	Tenebrius-Hafen
					15.8333	39.3333	Kap Tenebrium		15.9167	39.6667	Kap Tenebrium
					15.0833	39.5	Dianium		15.6667	39.5	Dianium
					15	39	Turia-Mündung		15	39	Turia-Mündung
					14.5	38.9167	Pallantia-Mündung		14.6667	38.9167	Pallantia-Mündung
					14	38.8333	Sucro-Mündung		14	38.3333	Sucro-Mündung
					13.5	38.75	Ilicitanus-Hafen		13.5	38.75	Ilicitanus-Hafen
					13	38.75	Saetabis-Mündung		13	38.75	Saetabis-Mündung
					12.5	38.5833	Alonis		12.6667	38.5833	Alonis
					12.5	38.5	Tader-Mündung		12.5	38.5	Tader-Mündung
					12.5	38.1667	Kap Scombraria		12.9167	38.0833	Kap Scombraria
					12.25	37.9167	Carthago Nova*		12.25	37.9167	Carthago Nova*
					12.1667	37.5	Lucentum		12.1667	37.5	Lucentum
					12	37.4167	Urci		12	37.3333	Urci
					12	37.25	Baetica (Ostende am Baliarischen Meer)		12	37.25	Baetica (Ostende am Baliarischen Meer)
					11.75	37.1667	Baria		11.75	37.1667	Baria
					11.5	36.8333	Kap des Charidemus		11.5	36.833	Kap des Charidemus
					11.3333	37.0833	Portus Magnus		11.3333	37.0833	Portus Magnus
					10.75	37.1667	Abdara		10.75	37.1667	Abdara
									10.8333	37.0833	Landspitze
					10.25	37.25	Selambina		10.25	37.25	Selambina
9.75	37.75	Sexi			9.75	37.25	Sexi		9.75	37.25	Sexi
					9.25	37.1667	Maenoba		9.25	37.25	Maenoba
					8.83333	37.1667	Malaca		8.83333	37.5	Malaca
					8.5	37	Salduba-Mündung		8.5	37	Salduba-Mündung
					8	36.9167	Suel		8	36.917	Suel
					7.66667	36.6667	Barbesula-Mündung		7.66667	36.6667	Barbesula-Mündung
					7.5	36.25	Calpe		7.5	36.25	Calpe
					7.5	36.1667	Carteia		7.5	36.1667	Carteia
					7.25	36.5	Barbesula		7.25	36.1667	Barbesula
					6.83333	36.0833	Iulia Traducta		6.66667	36.3333	Iulia Traducta
					6.5	36.1667	Mellaria		6.5	36.5	Mellaria
					6.25	36.0833	Baelo		6.25	36.6667	Baelo
					6.16667	36.0833	Baelo-Mündung		6.16667	36.1667	Baelo-Mündung
					5.75	36.0833	Hera-Tempel		5.75	36	Hera-Tempel
					6	36.3333	Menestheus-Hafen		6	36.3333	Menestheus-Hafen
					6	36.75	Ästuarbei Asta		6	36.75	Ästuar bei Asta
					5.33333	37	Baetis-Mündung (östliche)		5.33333	37	Baetis-Mündung (östliche)
					5.08333	37.1667	Baetis-Mündung (westliche)		5.08333	37.1667	Baetis-Mündung (westliche)
					4.66667	37.3333	Onoba Ästuaria		4.66667	37.3333	Onoba Ästuaria
					4.33333	37.5	Anas-Mündung (östliche)		4.33333	37.5	Anas-Mündung (östliche)
					4.08333	37.6667	Anas-Mündung (westliche)		4.08333	37.6667	Anas-Mündung (westliche)
					3.66667	37.75	Balsa		3.66667	37.75	Balsa
					3	37.9167	Ossonoba		3	37.8333	Ossonoba
					2.5	38.25	Heiliges Kap		2.5	38.25	Heiliges Kap
					5	39	Calopus-Mündung		5	39	Callipus-Mündung
					5.08333	39.4167	Salacia		5.08333	39.4167	Salacia
					4.91667	39.8333	Caetobriga		4.41667	39.5	Caetobriga
					4.83333	39.8333	Kap Barbarium		4.25	39.75	Kap Barbarium
					5.16667	40.25	Olisipo		5.16667	40.25	Olisipo
5.66667	40.5	Tagus-Mündung			5.5	40.1667	Tagus-Mündung		5.5	40.1667	Tagus-Mündung
					5	40.6667	Berg der Selene		5	40.6667	Berg der Selene
					5.16667	40.8333	Munda-Mündung		5.16667	40.8333	Munda-Mündung
					5.5	41.3333	Vacua-Mündung		5.16667	41.3333	Vacua-Mündung
					5.33333	41.8333	Durius-Mündung		5.33333	41.8333	Durius-Mündung
					5.5	42.25	Avus-Mündung		5.5	42.25	Avus-Mündung
5.5	42	Kap Avarum			5.167	42.5	Kap Avarum		5.167	42.5	Kap Avarum
					5.66667	42.75	Nebis-Mündung		5.66667	42.75	Nebis-Mündung
					5.5	43.25	Limia-Mündung		5.5	43.25	Limia-Mündung
					5.33333	43.6667	Minius-Mündung		5.33333	43.6667	Minius-Mündung
					5.5	44	Kap Orubium		5.5	44	Kap Orvium
					5.66667	44.3333	Ulla-Mündung		5.66667	44.3333	Ulla-Mündung
					5.66667	44.6667	Tamaris-Mündung		5.66667	44.6667	Tamaris-Mündung
					5.66667	45	Hafen der Artabrer		5.33333	45	Hafen der Artabrer
					5.25	45.1667	Kap Nerium		5.25	45.1667	Kap Nerium
					5.66667	45.1667	Altäre des Sestius		5.66667	45.5	Altäre des Sestius
					6.25	45.5	Vir-Mündung		6.25	45.5	Vir-Mündung
					6.5	45.5	Nächstes Kap		6.5	45.5	Nächstes Kap
					6.75	45	Flavium Brigantium		7.25	45	Flavium Brigantium
					8.25	45.8333	Kap Lapatia Coru		8.25	45.8333	Kap Lapatia Coru
					9	45.75	Mearus-Mündung		9	45.75	Mearus-Mündung
					10.3333	45.6667	Nabius-Mündung		10.3333	45.6667	Nabius-Mündung
					11.6667	45.75	Navia-Mündung		11.3333	45.75	Navia-Mündung
					11.75	45.4167	Flavionavia		11.75	45.4167	Flavionavia
					12	45.1667	Naelo		12	45.5	Naelo
					13	45.5	Noega Ucesia		13	45.6667	Noega Ucesia
					13.1667	44.6667	Nerva-Mündung		13.1667	44.6667	Nerva-Mündung
					13.5	44.25	Flaviobriga		13.5	44.25	Flaviobriga
					13.8333	44.0833	Deva-Mündung		13.75	44.4167	Deva-Mündung
					14.3333	45	Menosca		14.3333	45	Menosca
					15.1667	45.0833	Oiarso		15.1667	45.0833	Oiarso
					15.1667	45.8333	Kap Oiarso		15	45.8333	Kap Oiarso
					16.75	44.75	Aturus-Mündung		16.75	44.75	Aturus-Mündung
					17	45.3333	Sigmatis-Mündung		17	45.3333	Sigmatis-Mündung
					16.5	46	Kap Curianum		16.5	46	Kap Curianum
					17.5	46.5	Garumna-Mündung		17.5	46.5	Garumna-Mündung
					16.5	46.75	Hafen der Santonen
					16.5	46.75	Kap der Santonen		16.5	46.75	Kap der Santonen
					17.25	47.75	Carantonus-Mündung		17.25	47.75	Carantonus-Mündung
					17	48	Kap Pictonium		17	48	Kap Pictonium
					17.5	48.25	Sicor-Hafen		17.5	48.25	Sicor-Hafen
					17.6667	48.5	Liger-Mündung		17.6667	48.5	Liger-Mündung
					17.6667	48.75	Brivates-Hafen		17.6667	48.75	Brivates-Hafen
					17	49.25	Herius-Mündung		17	49.25	Herius-Mündung
					16.5	49.6667	Vidana-Hafen		16.5	49.6667	Vidana-Hafen
					15.25	49.75	Kap Gabaeum		15.25	49.75	Kap Gabaeum
					16.5	50	Salioncanus-Hafen		16.5	50.25	Saliocanus-Hafen
					17.3333	50.3333	Titus-Mündung		17.3333	50.3333	Titus-Mündung
					18.8333	50.8333	Cruciatonnum		18.8333	50.3333	Cruciatonnum
					18.75	51	Olina-Mündung		18.75	51	Olina-Mündung
					19.5	51.1667	Noviomagus		19.5	51.1667	Noviomagus
					20	51.1667	Sequana-Mündung		20	51.5	Sequana-Mündung
					21.75	52.3333	Frudis-Mündung		21.75	52.3333	Frudis-Mündung
					22.25	53.5	Kap Itium		22	53.5	Kap Itium
					22.5	53.5	Gerosiacum*		22.75	53.5	Gerosiacum*
					24.6667	53.5	Mosa-Mündung		24.5	53.5	Mosa-Mündung
					26.5	53.3333	Lugdunum		26.5	53.3333	Lugdunum
					26.75	53.3333	Rhenus-Mündung (westliche)		26.75	53.3333	Rhenus-Mündung (westliche)

## Sheet: Ksi distances
From			To
longitude	latitude	Place name	longitude	latitude	Place name	Distance
6.5	35.9167	Tingis Caesarea*	7	35.8333	Ualon-Mündung	206.815
7	35.8333	Ualon-Mündung	7.5	35.9167	Exilissa	206.815
7.5	35.9167	Exilissa	7.5	35.8333	Heptadelphoi-Gebirge	41.6667
7.5	35.8333	Heptadelphoi-Gebirge	7.83333	35.6667	Abyle	158.872
7.83333	35.6667	Abyle	8	35.5	Kapdes Phoibos	107.413
8	35.5	Kapdes Phoibos	8.33333	35.0833	Iagath	248.814
8.33333	35.0833	Iagath	8.5	35	Thaluda-Mündung	79.9447
8.5	35	Thaluda-Mündung	8.83333	35.1667	Kap Oleastron	159.83
8.83333	35.1667	Kap Oleastron	9	34.9167	Akrath	142.408
9	34.9167	Akrath	9.5	34.5	Taenia Longa	292.641
9.5	34.5	Taenia Longa	10	35	Kap Sestiaria	323.563
10	35	Kap Sestiaria	10.1667	34.75	Rusaddir	142.475
10.1667	34.75	Rusaddir	10.5	34.9167	Kap Metagonion	160.186
10.5	34.9167	Kap Metagonion	10.75	34.75	Molachath-Mündung	132.18
10.75	34.75	Molachath-Mündung	11.1667	34.8333	Malua-Mündung	176.09
11.1667	34.8333	Malua-Mündung	11.75	35	Grosses Kap	253.264
11.75	35	Grosses Kap	11.8333	34.75	Gypsaria	129.59
11.8333	34.75	Gypsaria	12	34.6667	Siga	80.1814
12	34.6667	Siga	12.25	34.6667	Siga-Mündung	102.809
12.25	34.6667	Siga-Mündung	12.5	34.25	Assarath-Mündung	232.434
12.5	34.25	Assarath-Mündung	12.75	34.5	Portus Magnus	162.077
12.75	34.5	Portus Magnus	13	34	Chylemath-Mündung	270.51
13	34	Chylemath-Mündung	13.3333	34	Quiza	138.173
13.3333	34	Quiza	13.5	33.75	Portus Divinus	142.87
13.5	33.75	Portus Divinus	13.8333	33.8333	Arsenaria	144.642
13.8333	33.8333	Arsenaria	14.25	33.6667	Kartennos-Mündung	192.225
14.25	33.6667	Kartennos-Mündung	14.5	33.6667	Cartennae*	104.035
14.5	33.6667	Cartennae*	14.8333	33.6667	Karepula	138.713
14.8333	33.6667	Karepula	15.5	33.5	Gunugu	289.928
15.5	33.5	Gunugu	15.5	33.6667	Kap des Apollon	83.3333
15.5	33.6667	Kap des Apollon	15.8333	33.5833	Castra Germanorum	144.9
15.8333	33.5833	Castra Germanorum	16.1667	33.5	Kanukkis	145.028
16.1667	33.5	Kanukkis	16.6667	33.3333	Chinalaph-Mündung	224.696
16.6667	33.3333	Chinalaph-Mündung	17	33.3333	Iol Caesarea*	139.248
17	33.3333	Iol Caesarea*	17.5	33.5	Tipasa	224.696
17.5	33.5	Tipasa	17.6667	33	Via	259.532
17.6667	33	Via	18	33	Icosium	139.778
18	33	Icosium	18.1667	33.4167	Sauos-Mündung	219.691
18.1667	33.4167	Sauos-Mündung	18.5	32.75	Rusguniae	361.402
18.5	32.75	Rusguniae	18.75	32.8333	Rusibikar	113.04
18.75	32.8333	Rusibikar	19.1667	32.9167	Audunga	179.863
19.1667	32.9167	Audunga	19.5	32.8333	Serbes-Mündung	146.046
19.5	32.8333	Serbes-Mündung	19.75	32.8333	Cissi	105.031
19.75	32.8333	Cissi	20	32.8333	Addyme	105.031
20	32.8333	Addyme	20.25	32.75	Rusuccuru	113.04
20.25	32.75	Rusuccuru	20.5	32.75	Iomnion	105.13
20.5	32.75	Iomnion	20.75	32.6667	Rusubisir	113.131
20.75	32.6667	Rusubisir	21	32.6667	Rusazus	105.228
21	32.6667	Rusazus	21.5	32.5	Uabar	226.536
21.5	32.5	Uabar	22	32.5	Saldae*	210.848
22	32.5	Saldae*	22.1667	32.5	Nasavath-Mündung	70.2826
22.1667	32.5	Nasavath-Mündung	22.6667	32.3333	Choba	226.9
22.6667	32.3333	Choba	23	32.25	Sisar-Mündung	146.922
23	32.25	Sisar-Mündung	23.3333	32.0833	Iarsath	163.857
23.3333	32.0833	Iarsath	23.6667	32.25	Kap Audon	163.857
23.6667	32.25	Kap Audon	23.8333	32	Audos-Mündung	143.547
23.8333	32	Audos-Mündung	24	32	Igilgili	70.6707
24	32	Igilgili	24.6667	31.8333	Gulos-Mündung	294.955
24.6667	31.8333	Gulos-Mündung	25.1667	31.75	Assarath	216.539
25.1667	31.75	Assarath	26.25	31.75	Ampsaga-Mündung	460.606
26.25	31.75	Ampsaga-Mündung	27	31.75	Winkel des Numidischen Golfes	318.881
27	31.75	Winkel des Numidischen Golfes	27.3333	32.5	Chullu	400.683
27.3333	32.5	Chullu	27.6667	32.5	Rusicade	140.565
27.6667	32.5	Rusicade	27.75	32.75	Kap Treton	129.832
27.75	32.75	Kap Treton	28.167	32.5	Thysikath	215.548
28.167	32.5	Thysikath	28.6667	32	Holkachites-Golf	327.327
28.6667	32	Holkachites-Golf	29	32.5	Takatye	286.998
29	32.5	Takatye	29.3333	32.5833	Kollops Mikros	146.548
29.3333	32.5833	Kollops Mikros	29.5	32.6667	Siur	81.6211
29.5	32.6667	Siur	30	32.75	Hippu Akra	214.445
30	32.75	Hippu Akra	30.6667	32.6667	Kap Stoborron	283.555
30.6667	32.6667	Kap Stoborron	30.8333	32.6667	Aphrodision	70.1521
30.8333	32.6667	Aphrodision	30.3333	32.25	Hippo Regius	296.48
30.3333	32.25	Hippo Regius	30.5	32.25	Rubricatus-Mündung	70.4773
30.5	32.25	Rubricatus-Mündung	31.25	32.3333	Thabraka*	319.728
31.25	32.3333	Thabraka*	31.6667	32.8333	Heiligtum des Apollon	305.475
31.6667	32.8333	Heiligtum des Apollon	32	32.75	Altäre des Poseidon	146.172
32	32.75	Altäre des Poseidon	32.5	32.75	Hippon Diarrhytos	210.26
32.5	32.75	Hippon Diarrhytos	33	32.5	Thinisa	244.863
33	32.5	Thinisa	33.5	33.5	Kapdes Apollon	542.179
33.5	33.5	Kapdes Apollon	33.3333	32.75	Utica*	381.439
33.3333	32.75	Utica*	33.6667	32.5	Lagerdes Cornelius	187.959
33.6667	32.5	Lagerdes Cornelius	34	32.6667	Bagradas-Mündung	163.298
34	32.6667	Bagradas-Mündung	34.8333	32.6667	Karchedon*	350.759
34.8333	32.6667	Karchedon*	34.8333	32.5	Katadas-Mündung	83.3333
34.8333	32.5	Katadas-Mündung	35	32.6667	Maxula	108.972
35	32.6667	Maxula	35	33	Carpis	166.667
35	33	Carpis	35	33.25	Missua	125
35	33.25	Missua	35	33.3333	Clupea	41.6667
35	33.3333	Clupea	35	33.5	Kap Hermaia	83.3333
35	33.5	Kap Hermaia	35.25	33.3333	Aspis	133.531
35.25	33.3333	Aspis	35.5	33.1667	Curubis	133.687
35.5	33.1667	Curubis	35.75	33	Neapolis	133.842
35.75	33	Neapolis	36	32.8333	Siagul	133.997
36	32.8333	Siagul	36.5	32.6667	Aphrodision	226.171
36.5	32.6667	Aphrodision	36.6667	32.6667	Hadrumetum*	70.1521
36.6667	32.6667	Hadrumetum*	36.8333	32.6667	Ruspina	70.1521
36.8333	32.6667	Ruspina	37.1667	32.5	Leptis Minor	163.298
37.1667	32.5	Leptis Minor	37.25	32.5	Thapsos	35.1413
37.25	32.5	Thapsos	37.75	32.3333	Acholla	226.9
37.75	32.3333	Acholla	38	32.3333	Ruspai	105.619
38	32.3333	Ruspai	38.5	32.3333	Kap Brachodes	211.238
38.5	32.3333	Kap Brachodes	38.1667	32.1667	Usilla	163.746
38.1667	32.1667	Usilla	38.5	32	Taphrura	163.968
38.5	32	Taphrura	38.5	31.6667	Thenai	166.667
38.5	31.6667	Thenai	38.5	31.25	Makomada	208.333
38.5	31.25	Makomada	38.6667	30.5	Triton-Mündung	381.76
38.6667	30.5	Triton-Mündung	38.8333	30.5	Takape	71.8024
38.8333	30.5	Takape	39.3333	30.3333	Gigthis	231.136
39.3333	30.3333	Gigthis	40.1667	31.25	Gidaphtha	581.531
40.1667	31.25	Gidaphtha	40.6667	31.3333	Kap Zita	217.659
40.6667	31.3333	Kap Zita	41	31.5	Sabratha	164.847
41	31.5	Sabratha	41.25	31.5	Pisidon	106.58
41.25	31.5	Pisidon	41.5	31.6667	Oea	135.216
41.5	31.6667	Oea	41.75	31.6667	Garapha	106.39
41.75	31.6667	Garapha	42	31.6667	Leptis Magna*	106.39
42	31.6667	Leptis Magna*	42.25	31.5	Kinyps-Mündung	135.216
42.25	31.5	Kinyps-Mündung	42.5	31.5	Barathia	106.58
42.5	31.5	Barathia	42.9167	31.3333	Kap Trioron	196.352
42.9167	31.3333	Kap Trioron	43.25	31	Kisternai	219.352
43.25	31	Kisternai	43.6667	31	Kap Kephalai	178.576
43.6667	31	Kap Kephalai	43.5	30.8333	Makomaka	109.798
43.5	30.8333	Makomaka	43.6667	30.3333	Aspis	260.09
43.6667	30.3333	Aspis	43.8333	30	Zagazaena	181.572
43.8333	30	Zagazaena	44.1667	29.6667	Euphrantas Pyrgos	220.637
44.1667	29.6667	Euphrantas Pyrgos	44.5	29.3333	Pharaxa	220.952
44.5	29.3333	Pharaxa	45	29	Oisporis	274.651
45	29	Oisporis	46	29	HippuAkra	437.309
46	29	HippuAkra	46.75	29	Philainu	327.982
46.75	29	Philainu	47.25	29.1667	Festung Automala	233.831
47.25	29.1667	Festung Automala	47.25	29.3333	KapDrepanon	83.3333
47.25	29.3333	KapDrepanon	47.3333	29.6667	Hyphaloi	170.566
47.3333	29.6667	Hyphaloi	47.25	30	Diarrhoia	170.541
47.25	30	Diarrhoia	47.3333	30.5	Turmdes Herakles	252.578
47.3333	30.5	Turmdes Herakles	47.3333	30.8333	Festung Diachersis	166.667
47.3333	30.8333	Festung Diachersis	47.25	31.1667	Northern Cape	170.467
47.25	31.1667	Northern Cape	47.5	31.25	Bryon-Strand	114.738
47.5	31.25	Bryon-Strand	47.8333	31.3333	Berenike*	148.392
47.8333	31.3333	Berenike*	48.25	31.3333	Lathon-Mündung	177.949
48.25	31.3333	Lathon-Mündung	48.3333	31.3333	Arsinoe*	35.5898
48.3333	31.3333	Arsinoe*	49.0833	31.1667	Ptolemaïs*	331.245
49.0833	31.1667	Ptolemaïs*	49.5	31.5	Ausigda	243.81
49.5	31.5	Ausigda	49.5	31.6667	Aptuchu Hieron	83.3333
49.5	31.6667	Aptuchu Hieron	50	31.8333	Kapdes Phykes	228.337
50	31.8333	Kapdes Phykes	50.1667	31.6667	Apollonia*	109.389
50.1667	31.6667	Apollonia*	50.3333	31.6667	Naustathmos	70.9264
50.3333	31.6667	Naustathmos	50.5	31.5	Erythron	109.471
50.5	31.5	Erythron	50.75	31.3333	Chersis	135.366
50.75	31.3333	Chersis	51	31.3333	Kap Zephyrion	106.77
51	31.3333	Kap Zephyrion	51.25	31.25	Darnis	114.656
51.25	31.25	Darnis	51.6667	31.25	Aziris	178.107
51.6667	31.25	Aziris	52	31.6667	Chersonesos Megale*	252.22
52	31.6667	Chersonesos Megale*	52.1667	31.25	Phthia	220.127
52.1667	31.25	Phthia	52.25	31.25	Paliuros	35.6213
52.25	31.25	Paliuros	52.5	31.25	Batrachos	106.864
52.5	31.25	Batrachos	52.75	31.25	Petra Mikra	106.864
52.75	31.25	Petra Mikra	53.1667	31.25	Antipyrgos	178.107
53.1667	31.25	Antipyrgos	53.5	31.1667	Skythranios	148.513
53.5	31.1667	Skythranios	53.75	31.25	Kap Kataionion	114.744
53.75	31.25	Kap Kataionion	54	31.1667	Kap Ardanis	114.744
54	31.1667	Kap Ardanis	54.1667	31.1667	Petra Megale	71.3055
54.1667	31.1667	Petra Megale	54.3333	31.1667	Panormos	71.3054
54.3333	31.1667	Panormos	54.75	31.25	Katabathmos Megas	182.992
54.75	31.25	Katabathmos Megas	55	31.1667	Ainesisphyra	114.744
55	31.1667	Ainesisphyra	55.25	31.1667	Zytris	106.958
55.25	31.1667	Zytris	55.5	31.1667	Chettaia	106.958
55.5	31.1667	Chettaia	55.75	31.1667	Zagylis	106.958
55.75	31.1667	Zagylis	56	31.5	Selinus	197.933
56	31.5	Selinus	56.3333	31.0833	Dorf des Trisarchos	252.362
56.3333	31.0833	Dorf des Trisarchos	56.6667	31.0833	Apis-Heiligtum	142.736
56.6667	31.0833	Apis-Heiligtum	57	31.1667	Paraitonion*	148.633
57	31.1667	Paraitonion*	57.1667	31.1667	Kap Pythias	71.3055
57.1667	31.1667	Kap Pythias	57.3333	31.0833	Graias Gony	82.6138
57.3333	31.0833	Graias Gony	57.5	31.1667	Kap Kallias	82.6138
57.5	31.1667	Kap Kallias	57.6667	31.0833	Gyzis	82.6138
57.6667	31.0833	Gyzis	57.8333	31.1667	Leuke Akte	82.6138
57.8333	31.1667	Leuke Akte	58	31.25	Kap Hermaia	82.5597
58	31.25	Kap Hermaia	58.3333	31.1667	Phönizischer Hafen	148.513
58.3333	31.1667	Phönizischer Hafen	58.6667	31.0833	Antiphrai	148.633
58.6667	31.0833	Antiphrai	58.8333	31.1667	Kap Derris	82.6138
58.8333	31.1667	Kap Derris	59	31.0833	Leukaspis	82.6138
59	31.0833	Leukaspis	59.1667	31.1667	Kap Glaukon	82.6138
59.1667	31.1667	Kap Glaukon	59.5	31.0833	Chei	148.633
59.5	31.0833	Chei	59.75	31	Plinthine	114.919
59.75	31	Plinthine	60	31.0833	Chersonesos Mikra	114.919
60	31.0833	Chersonesos Mikra	60.5	31	Alexandreia*	218.213
60.5	31	Alexandreia*	60.75	31.0833	Kanobos	114.919
60.75	31.0833	Kanobos	60.8333	31.0833	Herakleotische Mündung	35.6841
60.8333	31.0833	Herakleotische Mündung	61.25	31.0833	Bolbitinische Mündung	178.42
61.25	31.0833	Bolbitinische Mündung	61.5	31.0833	Sebennytische Mündung	107.052
61.5	31.0833	Sebennytische Mündung	61.75	31.0833	Pineptimi (Pseudo-Mündung)	107.052
61.75	31.0833	Pineptimi (Pseudo-Mündung)	62.1667	31.1667	Diolkos (Pseudo-Mündung)	183.145
62.1667	31.1667	Diolkos (Pseudo-Mündung)	62.5	31.1667	Pathmetische Mündung	142.611
62.5	31.1667	Pathmetische Mündung	62.75	31.1667	Mendesische Mündung	106.958
62.75	31.1667	Mendesische Mündung	63	31.25	Tanitische Mündung	114.744
63	31.25	Tanitische Mündung	63.25	31.25	Pelusische Mündung	106.864
63.25	31.25	Pelusische Mündung	63.5	31.25	Pelusion*	106.864
63.5	31.25	Pelusion*	63.6667	31.25	Gerron (Endpunktder Kasiotis)	71.2427
63.6667	31.25	Gerron (Endpunktder Kasiotis)	63.8333	31.1667	Kasion	82.5597
63.8333	31.1667	Kasion	64	31.1667	Sirbonis-See (Durchbruch)	71.3055
64	31.1667	Sirbonis-See (Durchbruch)	64.25	31.1667	Ostrakine	106.958
64.25	31.1667	Ostrakine	64.6667	31.8333	Rhinokorura	377.709
64.6667	31.8333	Rhinokorura	64.8333	31.6667	Anthedon	109.389
64.8333	31.6667	Anthedon	64.9167	31.5	Hafen der Gazaier	90.5778
64.9167	31.5	Hafen der Gazaier	65	31.6667	Askalon*	90.5778
65	31.6667	Askalon*	65.25	31.8333	Azotos	135.066
65.25	31.8333	Azotos	65	32	Hafen der Iamniten	134.915
65	32	Hafen der Iamniten	65.6667	32.0833	Ioppe	285.609
65.6667	32.0833	Ioppe	66	32.25	Apollonia	163.857
66	32.25	Apollonia	66.25	32.5	Kaisareia des Straton*	163.615
66.25	32.5	Kaisareia des Straton*	66.3333	32.5833	Chorseas-Mündung	54.4966
66.3333	32.5833	Chorseas-Mündung	66.5	32.6667	Dora	81.6211
66.5	32.6667	Dora	66.4167	32.9167	Karmelos-Berg	129.815
66.4167	32.9167	Karmelos-Berg	66.8333	32.8333	Sykaminon	179.863
66.8333	32.8333	Sykaminon	66.8333	33	Ptolemaïs	83.3333
66.8333	33	Ptolemaïs	67.1667	33.25	Ekdippa	187.37
67.1667	33.25	Ekdippa	67.1667	33.5	Sidon	125
67.1667	33.5	Sidon	67.5	33.5833	Leon-Mündung	145.028
67.5	33.5833	Leon-Mündung	67.5	33.6667	Berytos	41.6667
67.5	33.6667	Berytos	67.6667	33.75	Adonis-Mündung	80.8811
67.6667	33.75	Adonis-Mündung	67.6667	33.9167	Byblos	83.3333
67.6667	33.9167	Byblos	67.5	34.0833	Botrys	108.247
67.5	34.0833	Botrys	67.3333	34.25	Kap Theuprosopon	108.16
67.3333	34.25	Kap Theuprosopon	67.5	34.3333	Tripolis	80.4749
67.5	34.3333	Tripolis	67.6667	34.3333	Orthosia	68.8142
67.6667	34.3333	Orthosia	67.8333	34.3333	Simyra	68.8142
67.8333	34.3333	Simyra	68	34.4167	Eleutheros-Mündung	80.4164
68	34.4167	Eleutheros-Mündung	68.3333	34.5	Balaneai	143.601
68.3333	34.5	Balaneai	68.3333	34.75	Paltos	125
68.3333	34.75	Paltos	68.3333	34.9167	Gabala	83.3333
68.3333	34.9167	Gabala	68.5	35.0833	Laodikeia*	107.723
68.5	35.0833	Laodikeia*	68.3333	35.1667	Herakleia	79.8852
68.3333	35.1667	Herakleia	68.5	35.25	Poseidion	79.8257
68.5	35.25	Poseidion	68.5	35.5	Orontes-Mündung	125
68.5	35.5	Orontes-Mündung	68.5833	35.5833	Seleukeiavon Pierien	53.7176
68.5833	35.5833	Seleukeiavon Pierien	69	35.8333	Rhosischer Felsen	210.338
69	35.8333	Rhosischer Felsen	69.3333	35.6667	Rhosos	158.872
69.3333	35.6667	Rhosos	69.5	35.8333	Myriandros	107.324
69.5	35.8333	Myriandros	69.5	36.0833	Alexandreiabei Issos	125
69.5	36.0833	Alexandreiabei Issos	69.5	36.3333	Grenzpunkt (Kilikien,Syrien)	125
69.5	36.3333	Grenzpunkt (Kilikien,Syrien)	69.3333	36.4167	Issos	78.9809
69.3333	36.4167	Issos	69	36.5	Aigaiai	140.375
69	36.5	Aigaiai	68.75	36.5	Serretilis	100.482
68.75	36.5	Serretilis	68.5	36.5	Mallos*	100.482
68.5	36.5	Mallos*	68.25	36.5	Pyramos-Mündung	100.482
68.25	36.5	Pyramos-Mündung	68	36.5	Saros-Mündung	100.482
68	36.5	Saros-Mündung	67.75	36.6667	Kydnos-Mündung	130.458
67.75	36.6667	Kydnos-Mündung	67.5	36.6667	Zephyrion	100.265
67.5	36.6667	Zephyrion	67.25	36.6667	Pompeiopolis*	100.265
67.25	36.6667	Pompeiopolis*	67	36.75	Lamos-Mündung	108.528
67	36.75	Lamos-Mündung	66.75	36.75	Sebaste	100.157
66.75	36.75	Sebaste	66.5	36.8333	Korykos	108.428
66.5	36.8333	Korykos	66.3333	36.6667	Kap Zephyrion	106.784
66.3333	36.6667	Kap Zephyrion	66.3333	36.8333	Kalykadnos-Mündung	83.3333
66.3333	36.8333	Kalykadnos-Mündung	66.1667	36.75	Kap Sarpedon	78.6743
66.1667	36.75	Kap Sarpedon	66	36.8333	Aphrodisias	78.6743
66	36.8333	Aphrodisias	65.75	36.8333	Kelenderis	100.048
65.75	36.8333	Kelenderis	65.5	36.8333	Arsinoe	100.048
65.5	36.8333	Arsinoe	65.3333	36.8333	Orymagdos-Mündung	66.6986
65.3333	36.8333	Orymagdos-Mündung	65.1667	36.8333	Anemurion	66.6986
65.1667	36.8333	Anemurion	64.8333	36.5833	Nephelis	182.969
64.8333	36.5833	Nephelis	64.6667	36.8333	Antiocheia	141.733
64.6667	36.8333	Antiocheia	64.3333	36.75	Selinus*	139.822
64.3333	36.75	Selinus*	64	36.75	Iotape	133.542
64	36.75	Iotape	63.8333	36.75	Syedra	66.7711
63.8333	36.75	Syedra	63.8333	36.6667	Grenzpunkt (Kilikien,Pamphylien)	41.6667
63.8333	36.6667	Grenzpunkt (Kilikien,Pamphylien)	63.5833	36.6667	Korakesion	100.265
63.5833	36.6667	Korakesion	63.4167	36.6667	Side*	66.8436
63.4167	36.6667	Side*	63.3333	36.6667	Melas-Mündung	33.4218
63.3333	36.6667	Melas-Mündung	63	36.9167	Eurymedon-Mündung	182.864
63	36.9167	Eurymedon-Mündung	62.6667	36.8333	Magydos	139.684
62.6667	36.8333	Magydos	62.8333	36.5	Kestros-Mündung	179.571
62.8333	36.5	Kestros-Mündung	62.5	36.5833	Katarraktes-Mündung	140.237
62.5	36.5833	Katarraktes-Mündung	62.25	36.5	Attaleia	108.728
62.25	36.5	Attaleia	62	36.5833	Olbia	108.728
62	36.5833	Olbia	61.8333	36.5	Grenzpunkt (Lykien,Pamphylien)	78.8586
61.8333	36.5	Grenzpunkt (Lykien,Pamphylien)	61.8333	36.4167	Phaselis	41.6667
61.8333	36.4167	Phaselis	61.5833	36.25	Olympos	130.708
61.5833	36.25	Olympos	61.5	36.0833	Heiliges Kap	89.8662
61.5	36.0833	Heiliges Kap	61.3333	36.3333	Gagai	141.937
61.3333	36.3333	Gagai	61.1667	36.4167	Aperlai	78.9809
61.1667	36.4167	Aperlai	61.1667	36.3333	Limyros-Mündung	41.6667
61.1667	36.3333	Limyros-Mündung	60.75	36.4167	Andriake*	172.838
60.75	36.4167	Andriake*	60.5	36.3333	Antiphellos	108.928
60.5	36.3333	Antiphellos	60.5	36	Patara*	166.667
60.5	36	Patara*	60.3333	36	Xanthos-Mündung	67.4181
60.3333	36	Xanthos-Mündung	60.1667	35.8333	Telmessos*	107.234
60.1667	35.8333	Telmessos*	60	35.9167	Daidala	79.3455
60	35.9167	Daidala	59.8333	35.9167	Krya	67.4892
59.8333	35.9167	Krya	59.6667	35.9167	Lydai	67.4892
59.6667	35.9167	Lydai	59.3333	35.9167	Kalinda	134.978
59.3333	35.9167	Kalinda	59.1667	36	Kaunos	79.285
59.1667	36	Kaunos	59	36.0833	Kalbis-Mündung	79.2244
59	36.0833	Kalbis-Mündung	58.25	36.1667	Physka	305.751
58.25	36.1667	Physka	58	36.1667	Phoinix	100.913
58	36.1667	Phoinix	57.6667	36	Kressa	158.388
57.6667	36	Kressa	57.3333	35.9167	Loryma	141.195
57.3333	35.9167	Loryma	57	35.8333	Kap Kynostema	141.331
57	35.8333	Kap Kynostema	56.6667	35.3333	Kap Onugnathos	284.38
56.6667	35.3333	Kap Onugnathos	56.25	36	Knidos*	373.841
56.25	36	Knidos*	57	36	Keramos	303.381
57	36	Keramos	57.3333	36.1667	Halikarnassos	158.388
57.3333	36.1667	Halikarnassos	57.3333	36.4167	Kap Skopias	125
57.3333	36.4167	Kap Skopias	57.6667	36.4167	Myndos	134.12
57.6667	36.4167	Myndos	57.8333	36.6667	Bargylia	141.801
57.8333	36.6667	Bargylia	57.8333	36.8333	Iassos	83.3333
57.8333	36.8333	Iassos	58	37	Miletos*	106.693
58	37	Miletos*	58	37.0833	Latmos-Mündung	41.6667
58	37.0833	Latmos-Mündung	58.8333	37.1667	Herakleia am Latmos	334.819
58.8333	37.1667	Herakleia am Latmos	57.8333	37.4167	Pyrrha	416.956
57.8333	37.4167	Pyrrha	57.6667	37.5	Maiander-Mündung	78.1785
57.6667	37.5	Maiander-Mündung	57.1667	37.6667	Kap Trogylion	214.929
57.1667	37.6667	Kap Trogylion	57.6667	37.6667	Ephesos*	197.895
57.6667	37.6667	Ephesos*	57.6667	37.8333	Kaystros-Mündung	83.3333
57.6667	37.8333	Kaystros-Mündung	57.6667	38.1667	Kolophon	166.667
57.6667	38.1667	Kolophon	57.5	38.3333	Lebedos	105.959
57.5	38.3333	Lebedos	57.1667	38.4167	Teos	137.143
57.1667	38.4167	Teos	56.6667	38.5833	Erythrai	212.659
56.6667	38.5833	Erythrai	57	38.5833	Klazomenai	130.284
57	38.5833	Klazomenai	57.4167	38.6667	Kap Argennon	168.009
57.4167	38.6667	Kap Argennon	57.8333	38.5833	Smyrna*	168.009
57.8333	38.5833	Smyrna*	57.5	38.75	Hermos-Mündung	154.528
57.5	38.75	Hermos-Mündung	57.5	38.8333	Phokaia	41.6667
57.5	38.8333	Phokaia	57.3333	39	Kyme	105.586
57.3333	39	Kyme	57	39.0833	Kap Hydra	135.989
57	39.0833	Kap Hydra	57.25	39.25	Myrina	127.815
57.25	39.25	Myrina	57	39.4167	Elaia	127.641
57	39.4167	Elaia	56.5	39.25	Pitane	210.56
56.5	39.25	Pitane	56.25	39.5	Kap Kaine	157.992
56.25	39.5	Kap Kaine	56.1667	39.5833	Kaikos-Mündung	52.6171
56.1667	39.5833	Kaikos-Mündung	56.8333	39.75	Poroselene	269.783
56.8333	39.75	Poroselene	56.5	40	Adramytion	178.844
56.5	40	Adramytion	56.5	40.3333	Antandros	166.667
56.5	40.3333	Antandros	56.25	40.5	Alt-Skepsis	126.497
56.25	40.5	Alt-Skepsis	56.1667	40.6667	Garganon	89.1392
56.1667	40.6667	Garganon	56	40.75	Assos	75.674
56	40.75	Assos	55.4167	40.6667	Alexandreia Troas*	224.986
55.4167	40.6667	Alexandreia Troas*	55.1667	41	Kap Sigeion	191.631
55.1667	41	Kap Sigeion	55.25	41	Skamander-Mündung	31.4462
55.25	41	Skamander-Mündung	55.25	41.0833	Dardanon	41.6667
55.25	41.0833	Dardanon	55.3333	41.1667	Simoeis-Mündung	52.1654
55.3333	41.1667	Simoeis-Mündung	55.3333	41.25	Abydos	41.6667
55.3333	41.25	Abydos	55.3333	41.4167	Lampsakos	83.3333
55.3333	41.4167	Lampsakos	55.5	41.5	Grenikos-Mündung	75.0766
55.5	41.5	Grenikos-Mündung	55.75	41.5	Parion	93.6194
55.75	41.5	Parion	56	41.8333	Aisepos-Mündung	191.042
56	41.8333	Aisepos-Mündung	56	41.5	Kyzikos*	166.667
56	41.5	Kyzikos*	56.3333	41.75	Rhyndakos-Mündung	176.483
56.3333	41.75	Rhyndakos-Mündung	56.3333	41.9167	Apameia*	83.3333
56.3333	41.9167	Apameia*	56.6667	42.0833	Daskylion	149.282
56.6667	42.0833	Daskylion	57.3333	42.0833	Prusias	247.39
57.3333	42.0833	Prusias	56.75	42.25	Askanios-Mündung	231.687
56.75	42.25	Askanios-Mündung	56.5	42.4167	Kap Poseidion	124.431
56.5	42.4167	Kap Poseidion	57	42.5	Olbia	189.09
57	42.5	Olbia	57.3333	42.5	Nikomedeia*	122.879
57.3333	42.5	Nikomedeia*	57	42.9167	Astakos	241.664
57	42.9167	Astakos	56.75	43	Trarion	100.523
56.75	43	Trarion	56.5	42.75	Kap Akritas	154.972
56.5	42.75	Kap Akritas	56.4167	43.0833	Chalkedon*	169.437
56.4167	43.0833	Chalkedon*	56.4167	43.3333	Artemis-Heiligtum	125
56.4167	43.3333	Artemis-Heiligtum	56.75	43.3333	Kap Bithynia	121.229
56.75	43.3333	Kap Bithynia	57	43.25	Artake	100.071
57	43.25	Artake	57.25	43.0833	Psyllis-Mündung	123.517
57.25	43.0833	Psyllis-Mündung	57.6667	43	Kalpa-Mündung	157.86
57.6667	43	Kalpa-Mündung	58	42.75	Sangarios-Mündung	174.766
58	42.75	Sangarios-Mündung	58.6667	42.75	Hypios-Mündung	244.774
58.6667	42.75	Hypios-Mündung	58.8333	43	Elata-Mündung	139.121
58.8333	43	Elata-Mündung	58.75	43.3333	Diospolis	169.415
58.75	43.3333	Diospolis	59	43.5	Herakleiaam Pontos*	123.242
59	43.5	Herakleiaam Pontos*	59.5	43.5	Psylleion	181.343
59.5	43.5	Psylleion	60	43.5	Tion	181.343
60	43.5	Tion	60.25	43.5	Parthenios-Mündung	90.6718
60.25	43.5	Parthenios-Mündung	60.5	43.5	Amastris	90.6718
60.5	43.5	Amastris	60.75	43.75	Kromna	154.312
60.75	43.75	Kromna	61	43.5833	Kytoros	122.965
61	43.5833	Kytoros	61.1667	43.8333	Klimax	138.758
61.1667	43.8333	Klimax	61.5	44	Thymaina	146.145
61.5	44	Thymaina	61.3333	44.4167	Kap Karambis	216.728
61.3333	44.4167	Kap Karambis	61.5	44.25	Zephyrion	102.457
61.5	44.25	Zephyrion	61.75	44.0833	Kallistratia	122.41
61.75	44.0833	Kallistratia	62	44	Abunoteichos	99.0449
62	44	Abunoteichos	62.5	44	Kimolis	179.835
62.5	44	Kimolis	62.9167	43.9167	Armene	155.648
62.9167	43.9167	Armene	63.3333	43.9167	Stephane	150.073
63.3333	43.9167	Stephane	63.8333	44	Sinope*	184.721
63.8333	44	Sinope*	63.6667	43.6667	Kyptasia	177.176
63.6667	43.6667	Kyptasia	64	43.5	Zaliskos-Mündung	146.696
64	43.5	Zaliskos-Mündung	64.25	43.3333	Gazoron	123.242
64.25	43.3333	Gazoron	64.5	43.1667	Halys-Mündung	123.426
64.5	43.1667	Halys-Mündung	65	43.0833	Amisos*	187.163
65	43.0833	Amisos*	65.5	43.1667	Grenzpunkt (Galatien,Kappadokien)	187.163
65.5	43.1667	Grenzpunkt (Galatien,Kappadokien)	65.6667	43.3333	Ankon der Leukosyrer	103.095
65.6667	43.3333	Ankon der Leukosyrer	66	43	Iris-Mündung	206.288
66	43	Iris-Mündung	66.3333	43.0833	Themiskyra	128.739
66.3333	43.0833	Themiskyra	66.8333	43.3333	Kap des Herakles	220.97
66.8333	43.3333	Kap des Herakles	67	43.25	Thermodon-Mündung	73.5885
67	43.25	Thermodon-Mündung	67.25	43.0833	Polemonion	123.517
67.25	43.0833	Polemonion	67.5	43.25	Kap Iasonion	123.517
67.5	43.25	Kap Iasonion	67.5833	43.0833	Kotyoron	88.7018
67.5833	43.0833	Kotyoron	67.8333	43.25	Hermonassa	123.517
67.8333	43.25	Hermonassa	68.3333	43.3333	Ischopolis	186.677
68.3333	43.3333	Ischopolis	68.8333	43.3333	Kerasus	181.843
68.8333	43.3333	Kerasus	69.3333	43.0833	Pharnakia	220.97
69.3333	43.0833	Pharnakia	70.75	43.3333	Hyssos-Hafen	531.192
70.75	43.3333	Hyssos-Hafen	70.75	43.0833	Trapezus*	125
70.75	43.0833	Trapezus*	71	43.4167	Pityus	189.913
71	43.4167	Pityus	71.1667	43.8333	Rizus	216.891
71.1667	43.8333	Rizus	71.25	43.75	Kap Adienon	51.3884
71.25	43.75	Kap Adienon	71.3333	43.75	Chordyle	30.0985
71.3333	43.75	Chordyle	71.6667	43.8333	Morthula	127.321
71.6667	43.8333	Morthula	72	44	Archabis-Mündung	146.145
72	44	Archabis-Mündung	72.0833	44.1667	Xyline	88.5453
72.0833	44.1667	Xyline	72.3333	44.3333	Kissa-Mündung	122.317
72.3333	44.3333	Kissa-Mündung	72.3333	44.5	Apsorros	83.3333
72.3333	44.5	Apsorros	72.6667	44.6667	Apsorros-Mündung	145.035
72.6667	44.6667	Apsorros-Mündung	72.3333	44.75	Sebastopolis	125.564
72.3333	44.75	Sebastopolis	72.5	44.75	Phasis	59.1821
72.5	44.75	Phasis	72.5	45	Phasis-Mündung	125
72.5	45	Phasis-Mündung	72	45.25	Chariustos-Mündung	216.191
72	45.25	Chariustos-Mündung	72	45.5	Aia	125
72	45.5	Aia	71.5	45.6667	Neapolis	193.799
71.5	45.6667	Neapolis	71.5	45.75	Siganeon	41.6667
71.5	45.75	Siganeon	71.5	46.1667	Kyaneos-Mündung	208.333
71.5	46.1667	Kyaneos-Mündung	71	46.5	Hippos-Mündung	239.945
71	46.5	Hippos-Mündung	71.1667	46.75	Dioskurias*	137.479
71.1667	46.75	Dioskurias*	70.5	47	Korax-Mündung	259.897
70.5	47	Korax-Mündung	70	46.8333	Karteron Teichos	190.013
70	46.8333	Karteron Teichos	69.6667	47.3333	Thessyris-Mündung	274.553
69.6667	47.3333	Thessyris-Mündung	69.6667	47.25	Oinantheia*	41.6667
69.6667	47.25	Oinantheia*	69	47.25	Burkas-Mündung	226.266
69	47.25	Burkas-Mündung	68.5	47.25	Ampsalis	169.7
68.5	47.25	Ampsalis	68	47	Kap Toretike	211.09
68	47	Kap Toretike	68	47.5	Lazos	250
68	47.5	Lazos	67.5	47.3333	Kerketischer Golf	188.577
67.5	47.3333	Kerketischer Golf	67	47.5	Achaia	188.577
67	47.5	Achaia	66.6667	47.5	Psychros-Mündung	112.598
66.6667	47.5	Psychros-Mündung	66.3333	47.5	Bata	112.598
66.3333	47.5	Bata	66.5	47.6667	Bata	100.519
66.5	47.6667	Bata	66	48	Sinda	236.52
66	48	Sinda	65.5	47.8333	Sindikos	187.131
65.5	47.8333	Sindikos	65	47.5	Hermonassa*	236.902
65	47.5	Hermonassa*	64.25	47.5	Korokondame	253.345
64.25	47.5	Korokondame	64.5	47.8333	Phanagoria	186.719
64.5	47.8333	Phanagoria	64.5	48.5	Achilles-Heiligtum	333.333
64.5	48.5	Achilles-Heiligtum	66.5	48.25	Apaturos	675.89
66.5	48.25	Apaturos	66.3333	48.5	Kap Kimmerion	136.708
66.3333	48.5	Kap Kimmerion	68	48.3333	Vardanes-Mündung	559.321
68	48.3333	Vardanes-Mündung	69	48.5	Mapeta	342.155
69	48.5	Mapeta	69.5	48.75	Psathis-Mündung	207.198
69.5	48.75	Psathis-Mündung	70	49	Gerusa	206.544
70	49	Gerusa	70	49.3333	Attikites-Mündung	166.667
70	49.3333	Attikites-Mündung	69.6667	49.8333	Tyrambe*	272.353
69.6667	49.8333	Tyrambe*	68	50	Azarabitis	543.005
68	50	Azarabitis	69	50.5	Kleiner Rhombites (Mündung)	405.852
69	50.5	Kleiner Rhombites (Mündung)	68.5	51.3333	Azara	445.478
68.5	51.3333	Azara	68.5	51.6667	Theophanios-Mündung	166.667
68.5	51.6667	Theophanios-Mündung	68.5	52	Grosser Rhombites (Mündung)	166.667
68.5	52	Grosser Rhombites (Mündung)	68	52.5	Patarue	293.129
68	52.5	Patarue	68	53	Marubios-Mündung	250
68	53	Marubios-Mündung	67.5	53.5	Paniardis	291.331
67.5	53.5	Paniardis	67	54.5	Tanaïs (östlicher Mündungsarm)	521.142
67	54.5	Tanaïs (östlicher Mündungsarm)	66.3333	54.1667	Tanaïs (westlicher Mündungsarm)	256.03
66.3333	54.1667	Tanaïs (westlicher Mündungsarm)	65	53.5	Karoia	515.633
65	53.5	Karoia	64.5	53	Poritos-Mündung	291.331
64.5	53	Poritos-Mündung	63.5	52.5	Hygreis	392.543
63.5	52.5	Hygreis	63	51.5	Lykos-Mündung	523.15
63	51.5	Lykos-Mündung	62.6667	51.25	Hain, Halieuma Theu	162.63
62.6667	51.25	Hain, Halieuma Theu	62.5	50.5	Agaros-Mündung	378.669
62.5	50.5	Agaros-Mündung	63	49.6667	Kap Agaron	446.478
63	49.6667	Kap Agaron	62.5	49.75	Knemoi	166.952
62.5	49.75	Knemoi	61	49.8333	Gerrhos-Mündung	485.958
61	49.8333	Gerrhos-Mündung	60.5	49.6667	Akra	181.759
60.5	49.6667	Akra	60.3333	49.5	Bykes-Mündung	99.3152
60.3333	49.5	Bykes-Mündung	60	49.25	Leianon	165.532
60	49.25	Leianon	60.3333	48.8333	Pasiakes-Mündung	235.241
60.3333	48.8333	Pasiakes-Mündung	60.5	48.6667	Neue Festung	99.817
60.5	48.6667	Neue Festung	60.5	48.5	Endpunkt beim See Byke	83.3333
60.5	48.5	Endpunkt beim See Byke	62	48.5	Herakleion	496.957
62	48.5	Herakleion	63	48.75	Zenons Chersonesos	353.338
63	48.75	Zenons Chersonesos	63.75	48.25	Parthenion	352.479
63.75	48.25	Parthenion	64	48.1667	Kap Myrmekion	93.1423
64	48.1667	Kap Myrmekion	64	47.9167	Pantikapaia*	125
64	47.9167	Pantikapaia*	63.8333	47.6667	Tyriktake	136.965
63.8333	47.6667	Tyriktake	63.75	47.5	Nymphaion	87.945
63.75	47.5	Nymphaion	63.3333	47.3333	Theodosia*	163.76
63.3333	47.3333	Theodosia*	63.5	47.1667	Istrianos-Mündung	100.719
63.5	47.1667	Istrianos-Mündung	63	47	Kap Korax	189.535
63	47	Kap Korax	62.5	47	Lagyra	170.499
62.5	47	Lagyra	62.3333	46.8333	Charax	100.918
62.3333	46.8333	Charax	62	46.6667	Kap Kriu Metopon	141.37
62	46.6667	Kap Kriu Metopon	61.75	47.25	Argoda	303.888
61.75	47.25	Argoda	61.25	47.1667	Ktenus	174.87
61.25	47.1667	Ktenus	61	47	Chersonesos	119.119
61	47	Chersonesos	60.6667	47	Kap Parthenion	113.666
60.6667	47	Kap Parthenion	61	47.25	Symbolon	168.773
61	47.25	Symbolon	60.75	47.3333	Dandake	94.4686
60.75	47.3333	Dandake	60.75	47.6667	Eupatoria	166.667
60.75	47.6667	Eupatoria	60.3333	48.3333	Endpunkt bei der Bucht von Karkina	361.307
60.3333	48.3333	Endpunkt bei der Bucht von Karkina	59.6667	48.5	Karkinites-Mündung	236.409
59.6667	48.5	Karkinites-Mündung	59.3333	48.5	Tamyrake*	110.437
59.3333	48.5	Tamyrake*	59.5	48	Schöner Hafen	256.084
59.5	48	Schöner Hafen	59.75	47.8333	Kephalonesos	118.165
59.75	47.8333	Kephalonesos	59.75	47.5	Kap Mysaris (östliches Kap des Dromos des Achill)	166.667
59.75	47.5	Kap Mysaris (östliches Kap des Dromos des Achill)	57.8333	47.5	Heiliges Kap (westliches Kap des Dromosdes Achill)	647.424
57.8333	47.5	Heiliges Kap (westliches Kap des Dromosdes Achill)	59	47.6667	Landenge des Dromos des Achill	402.192
59	47.6667	Landenge des Dromos des Achill	58.5	47.75	Hekate-Hain	173.309
58.5	47.75	Hekate-Hain	58	48.5	Hypanis-Mündung	410.452
58	48.5	Hypanis-Mündung	57.5	48.5	Borysthenes-Mündung	165.655
57.5	48.5	Borysthenes-Mündung	57	48	Axiakes-Mündung	300.352
57	48	Axiakes-Mündung	56.5	47.6667	Physke	236.52
56.5	47.6667	Physke	56.6667	47.6667	Tyras-Mündung	56.1202
56.6667	47.6667	Tyras-Mündung	56.25	47.5	Dorf des Hermonax	163.375
56.25	47.5	Dorf des Hermonax	56	47.25	Harpis	150.965
56	47.25	Harpis	56.25	47	Psilon (Mündung)	151.19
56.25	47	Psilon (Mündung)	56	46.8333	Nördliche Mündung	119.309
56	46.8333	Nördliche Mündung	56.25	46.6667	Pseudostomion (Mündung)	119.499
56.25	46.6667	Pseudostomion (Mündung)	56.25	46.5	Schöne Mündung	83.3333
56.25	46.5	Schöne Mündung	56.5	46.4167	Narakion-Mündung	95.6612
56.5	46.4167	Narakion-Mündung	56	46.0833	Heilige Mündung	240.134
56	46.0833	Heilige Mündung	56.3333	46	Kap Pteroton	122.964
56.3333	46	Kap Pteroton	55.6667	46	Histria	231.552
55.6667	46	Histria	55	45.8333	Tomi	246.419
55	45.8333	Tomi	54.6667	45.5	Callatis	203.331
54.6667	45.5	Callatis	54.6667	45.25	Dionysopolis	125
54.6667	45.25	Dionysopolis	55	45.1667	Kap Tiristis	124.595
55	45.1667	Kap Tiristis	54.8333	45	Odessus*	102.013
54.8333	45	Odessus*	54.75	44.8333	Panysus-Mündung	88.4026
54.75	44.8333	Panysus-Mündung	55	44.6667	Endpunkt beim Pontus	121.758
55	44.6667	Endpunkt beim Pontus	54.75	44.5	Anchialos	121.945
54.75	44.5	Anchialos	54.75	44.25	Apollonia* Pontike	125
54.75	44.25	Apollonia* Pontike	55	44.5	Tonzos-Mündung	153.649
55	44.5	Tonzos-Mündung	55.1667	44	Perontikon	257.027
55.1667	44	Perontikon	55.6667	44	Kap Thynias	179.835
55.6667	44	Kap Thynias	55.3333	43.6667	Strand von Halmydessos	205.504
55.3333	43.6667	Strand von Halmydessos	55.5	43.5	Kap Philia	102.899
55.5	43.5	Kap Philia	55.5	43.3333	Phinopolis	83.3333
55.5	43.3333	Phinopolis	56	43.0833	Byzanz*	220.97
56	43.0833	Byzanz*	55.5	43	Bathynias-Mündung	187.405
55.5	43	Bathynias-Mündung	55.5	42.9167	Athyras-Mündung	41.6667
55.5	42.9167	Athyras-Mündung	55	42.5	Selymbria	277.758
55	42.5	Selymbria	54.8333	42.3333	Herakleia*	103.583
54.8333	42.3333	Herakleia*	54.8333	42.1667	Arzos-Mündung	83.3333
54.8333	42.1667	Arzos-Mündung	54.6667	42	Bisanthe	103.776
54.6667	42	Bisanthe	54.5	41.9167	Lange Mauer	74.6746
54.5	41.9167	Lange Mauer	54.5	41.75	Paktye	83.3333
54.5	41.75	Paktye	54.5	41.5	Grenzpunkt der Thrakischen Chersonesan der Propontis	125
54.5	41.5	Grenzpunkt der Thrakischen Chersonesan der Propontis	55	41.5	Kallipolis	187.239
55	41.5	Kallipolis	54.9167	41.25	Sestos*	128.851
54.9167	41.25	Sestos*	54.9167	41	Koila	125
54.9167	41	Koila	54.6667	40.75	Kap gleich daneben	156.711
54.6667	40.75	Kap gleich daneben	54.5	40.75	Elaius*	63.1304
54.5	40.75	Elaius*	54.3333	40.6667	Mastusia	75.674
54.3333	40.6667	Mastusia	54.1667	41.0833	Kardiapolis	217.654
54.1667	41.0833	Kardiapolis	53.75	41.5	Grenzpunkt der Thrakischen Chersonesam Schwarzen Golf	260.586
53.75	41.5	Grenzpunkt der Thrakischen Chersonesam Schwarzen Golf	53.5	41.5	Mündung des Schwarzen Flusses	93.6194
53.5	41.5	Mündung des Schwarzen Flusses	53.25	41.3333	Breites Kap	125.426
53.25	41.3333	Breites Kap	53.1667	41.5	Ainos*	88.9988
53.1667	41.5	Ainos*	53	41.5	Hebros-Mündung	62.413
53	41.5	Hebros-Mündung	52.6667	41.6667	Maroneia	149.953
52.6667	41.6667	Maroneia	52.1667	41.75	Abdera	191.23
52.1667	41.75	Abdera	51.75	41.6667	Nessos	161.014
51.75	41.6667	Nessos	51.25	41.75	Neapolis	191.23
51.25	41.75	Neapolis	50.8333	41.75	Oisyme	155.428
50.8333	41.75	Oisyme	50.25	41.4167	Strymon-Mündung	274.541
50.25	41.4167	Strymon-Mündung	50.1667	41.3333	Arethusa	52.0933
50.1667	41.3333	Arethusa	50.3333	41.1667	Stageira	104.259
50.3333	41.1667	Stageira	50.6667	41	Panormos	150.752
50.6667	41	Panormos	51.25	41.25	Athos	252.775
51.25	41.25	Athos	51.1667	40.75	Kap Nymphaion	251.97
51.1667	40.75	Kap Nymphaion	50.9167	40.9167	Stratonike	126.052
50.9167	40.9167	Stratonike	50.6667	40.9167	Akanthos	94.4578
50.6667	40.9167	Akanthos	50.3333	40.6667	Singos	177.614
50.3333	40.6667	Singos	51.25	40.5	Kap Ampelos	357.92
51.25	40.5	Kap Ampelos	51.25	40.3333	Kap Derris	83.3333
51.25	40.3333	Kap Derris	50.75	40.4167	Torone	194.959
50.75	40.4167	Torone	50.6667	40.3333	Toronischer Golf (innerster Punkt)	52.3803
50.6667	40.3333	Toronischer Golf (innerster Punkt)	51	40.0833	Pallene (Landenge der Halbinsel)	178.399
51	40.0833	Pallene (Landenge der Halbinsel)	51.25	39.9167	Kap Kanastraion	126.939
51.25	39.9167	Kap Kanastraion	51.0833	40	Kasandreia	76.2643
51.0833	40	Kasandreia	50.6667	40.1667	Chabrios-Mündung	179.866
50.6667	40.1667	Chabrios-Mündung	50.5	40.0833	Kap Gigonis	76.1338
50.5	40.0833	Kap Gigonis	49.8333	40.3333	Thessalonike*	283.6
49.8333	40.3333	Thessalonike*	49.75	40.25	Echeduros-Mündung	52.4041
49.75	40.25	Echeduros-Mündung	49.6667	40.1667	Axios-Mündung	52.4279
49.6667	40.1667	Axios-Mündung	49.5	40	Lydias-Mündung	104.927
49.5	40	Lydias-Mündung	49.6667	39.75	Pydna	140.41
49.6667	39.75	Pydna	49.8333	39.6667	Haliakmon-Mündung	76.4595
49.8333	39.6667	Haliakmon-Mündung	50	39.5833	Dion	76.5244
50	39.5833	Dion	50.1667	39.5	Baphyras-Mündung	76.5892
50.1667	39.5	Baphyras-Mündung	50.5	39.4167	Peneios-Mündung	135.259
50.5	39.4167	Peneios-Mündung	51.3333	39.6667	Kap Magnesia	344.773
51.3333	39.6667	Kap Magnesia	51.75	39.25	Kap Rhiaia	263.203
51.75	39.25	Kap Rhiaia	51.3333	39.25	Aiantion	161.332
51.3333	39.25	Aiantion	51.1667	39.25	Iolkos	64.5327
51.1667	39.25	Iolkos	50.8333	38.9167	Pagasai	210.985
50.8333	38.9167	Pagasai	51	38.9167	Demetrias	64.8384
51	38.9167	Demetrias	50.75	38.8333	Eretriai	105.86
50.75	38.8333	Eretriai	51.5	38.8333	Kap Poseidion	292.114
51.5	38.8333	Kap Poseidion	51.3333	38.8333	Larissa Kremaste	64.9144
51.3333	38.8333	Larissa Kremaste	51.1667	38.75	Echinos	77.1682
51.1667	38.75	Echinos	51	38.6667	Spercheia	77.232
51	38.6667	Spercheia	51	38.5833	Theben in der Phthiotis	41.6667
51	38.5833	Theben in der Phthiotis	51	38.5	Spercheios-Mündung	41.6667
51	38.5	Spercheios-Mündung	51	38.4167	Malischer Golf	41.6667
51	38.4167	Malischer Golf	51.25	38.4167	Skarpheia	97.9391
51.25	38.4167	Skarpheia	51.5	38.4167	Boagrios-Mündung	97.9391
51.5	38.4167	Boagrios-Mündung	52	38.3333	Kynos	200.371
52	38.3333	Kynos	52.1667	38.4167	Knemides	77.4865
52.1667	38.4167	Knemides	52.25	38.1667	Oitäischer Golf (innerster Punkt)	129.207
52.25	38.1667	Oitäischer Golf (innerster Punkt)	52.6667	38.1667	Phokai	163.795
52.6667	38.1667	Phokai	53	38.0833	Anthedon	137.572
53	38.0833	Anthedon	53.0833	38	Salganeus	53.0372
53.0833	38	Salganeus	53.1667	37.8333	Ismenos-Mündung	89.5821
53.1667	37.8333	Ismenos-Mündung	53.25	37.75	Aulis	53.1064
53.25	37.75	Aulis	53.3333	37.6667	Oropos	53.1294
53.3333	37.6667	Oropos	53.5	37.5833	Chersonesos	78.0536
53.5	37.5833	Chersonesos	53.5	37.4167	Asopos-Mündung	83.3333
53.5	37.4167	Asopos-Mündung	53.8333	37.3333	Kap Kynosura	138.846
53.8333	37.3333	Kap Kynosura	53.6667	37.0833	Artemis-Heiligtum	141.527
53.6667	37.0833	Artemis-Heiligtum	53.6667	37	Panormos	41.6667
53.6667	37	Panormos	53.5833	36.75	Kap Sunion	129.368
53.5833	36.75	Kap Sunion	53.5	36.8333	Hyphormos	53.3807
53.5	36.8333	Hyphormos	53.25	37	Munychia	130.124
53.25	37	Munychia	52.8333	37.0833	Ilissos-Mündung	171.432
52.8333	37.0833	Ilissos-Mündung	52.75	37.1667	Peiraieus	53.2897
52.75	37.1667	Peiraieus	52.3333	37.25	Eleusis	171.077
52.3333	37.25	Eleusis	52	37.3333	Megara	138.986
52	37.3333	Megara	51.6667	37	Schoinus	213.113
51.6667	37	Schoinus	51.4167	36.9167	Kenchreai	108.226
51.4167	36.9167	Kenchreai	51.4167	36.75	Bukephalon	83.3333
51.4167	36.75	Bukephalon	51.5	36.5833	Hafen der Athener	89.7856
51.5	36.5833	Hafen der Athener	51.75	36.5	Kap Speiraion	108.728
51.75	36.5	Kap Speiraion	51.8333	36.4167	Epidauros	53.4712
51.8333	36.4167	Epidauros	52.1667	36.3333	Methana	140.512
52.1667	36.3333	Methana	52.3333	36.0833	Troizen	141.937
52.3333	36.0833	Troizen	52.5	36.0833	Kap Skyllaion	67.3468
52.5	36.0833	Kap Skyllaion	52	36	Hermione	206.397
52	36	Hermione	51.75	35.9167	Phlius	109.424
51.75	35.9167	Phlius	51.5833	36	Nauplia	79.285
51.5833	36	Nauplia	51.5	35.75	Inachos-Mündung	129.479
51.5	35.75	Inachos-Mündung	51.3333	35.8333	Prasia	79.4059
51.3333	35.8333	Prasia	51.1667	35.75	Kyphanta	79.4059
51.1667	35.75	Kyphanta	51	35.6667	Zarex	79.4662
51	35.6667	Zarex	51.0833	35.5	Epidauros Limera	89.9595
51.0833	35.5	Epidauros Limera	51.1667	35.25	Hafen des Zeus Soter	129.535
51.1667	35.25	Hafen des Zeus Soter	51.1667	35.1667	Minoa	41.6667
51.1667	35.1667	Minoa	51.3333	35	Kap Malea	107.679
51.3333	35	Kap Malea	51	35.0833	Boai	142.675
51	35.0833	Boai	51	35	Kap Onugnathos	41.6667
51	35	Kap Onugnathos	50.8333	35.0833	Asopos	79.9447
50.8333	35.0833	Asopos	50.75	35.1667	Biandyna	53.8284
50.75	35.1667	Biandyna	50.5833	35.1667	Akreia	68.1233
50.5833	35.1667	Akreia	50.5	35.1667	Eurotas-Mündung	34.0617
50.5	35.1667	Eurotas-Mündung	50.4167	35.1667	Trinassos	34.0617
50.4167	35.1667	Trinassos	50.3333	35.0833	Gythion	53.8284
50.3333	35.0833	Gythion	50.25	35	Las	53.8505
50.25	35	Las	50.1667	34.9167	Teuthrone	53.8725
50.1667	34.9167	Teuthrone	50.0833	34.8333	Kaine	53.8945
50.0833	34.8333	Kaine	50	34.75	Tainarion	53.9164
50	34.75	Tainarion	50	34.3333	Kap Tainaria	208.333
50	34.3333	Kap Tainaria	49.9167	34.8333	Leuktron	252.343
49.9167	34.8333	Leuktron	49.75	35.1667	Abea	180.104
49.75	35.1667	Abea	49.5	35.25	Pherai	110.305
49.5	35.25	Pherai	49.3333	35.25	Pamisos-Mündung	68.0535
49.3333	35.25	Pamisos-Mündung	49.25	35.25	Messene*	34.0267
49.25	35.25	Messene*	49	35.0833	Korone	131.857
49	35.0833	Korone	48.8333	35	Asine	79.9447
48.8333	35	Asine	48.5	35	Kap Akritas	136.525
48.5	35	Kap Akritas	48.75	35.25	Kolone	161.485
48.75	35.25	Kolone	48.5833	35.3333	Methone	79.766
48.5833	35.3333	Methone	48.5	35.4167	Kap Koryphasion	53.762
48.5	35.4167	Kap Koryphasion	48.5833	35.5	Pylos	53.7398
48.5833	35.5	Pylos	48.5	35.5833	Selas-Mündung	53.7176
48.5	35.5833	Selas-Mündung	48.4167	35.6667	Kap Kyparission	53.6954
48.4167	35.6667	Kap Kyparission	48.3333	35.9167	Alpheios-Mündung	129.489
48.3333	35.9167	Alpheios-Mündung	48.0833	36	Kap Ichthys	109.424
48.0833	36	Kap Ichthys	48	36.3333	Kap Chelonitis	170.027
48	36.3333	Kap Chelonitis	48.3333	36.5	Peneios-Mündung	157.901
48.3333	36.5	Peneios-Mündung	48.5	36.5	Kyllene	66.9881
48.5	36.5	Kyllene	48.5	36.75	Kap Araxos	125
48.5	36.75	Kap Araxos	48.6667	36.6667	Dyme	78.7359
48.6667	36.6667	Dyme	48.8333	36.75	Olenos	78.7359
48.8333	36.75	Olenos	49	36.8333	Patrai	78.6743
49	36.8333	Patrai	49.25	37	Poseidon-Heiligtum	130.124
49.25	37	Poseidon-Heiligtum	49.3333	37.1667	Kap Drepanon	89.7181
49.3333	37.1667	Kap Drepanon	49.5	36.9167	Erineos	141.596
49.5	36.9167	Erineos	49.75	36.9167	Aigion	99.9387
49.75	36.9167	Aigion	50.25	36.9167	Aigeira	199.877
50.25	36.9167	Aigeira	50.6667	37	Sys-Mündung	171.609
50.6667	37	Sys-Mündung	51.0833	36.9167	Asopos-Mündung	171.609
51.0833	36.9167	Asopos-Mündung	51.3333	37.0833	Lechaion	130.04
51.3333	37.0833	Lechaion	51.25	37.25	Hera-Heiligtum in der Korinthia	89.7046
51.25	37.25	Hera-Heiligtum in der Korinthia	51.4167	37.4167	Pegai	106.465
51.4167	37.4167	Pegai	51.25	37.5	Kreusa	78.1785
51.25	37.5	Kreusa	51.0833	37.5833	Siphai	78.1161
51.0833	37.5833	Siphai	50.5	37.5	Antikyra	234.989
50.5	37.5	Antikyra	50.25	37.5	Krisa	99.1691
50.25	37.5	Krisa	50	37.5	Kirrha	99.1691
50	37.5	Kirrha	49.9167	37.8333	Chaleos	169.899
49.9167	37.8333	Chaleos	49.75	37.75	Euanthia	77.9283
49.75	37.75	Euanthia	49.5	37.5833	Naupaktos	129.364
49.5	37.5833	Naupaktos	49.3333	37.4167	Kap Antirrhion	106.374
49.3333	37.4167	Kap Antirrhion	49	37.5	Euenos-Mündung	138.705
49	37.5	Euenos-Mündung	48.5	37.4167	Chersonesos	202.776
48.5	37.4167	Chersonesos	48.4167	37.5	Acheloos-Mündung	53.1983
48.4167	37.5	Acheloos-Mündung	48.3333	37.5833	Alyzeia	53.1753
48.3333	37.5833	Alyzeia	47.8333	37.6667	Kap Leukas	202.342
47.8333	37.6667	Kap Leukas	48.6667	37.75	Aktion	332.261
48.6667	37.75	Aktion	48	38.3333	Ambrakia*	392.409
48	38.3333	Ambrakia*	47.8333	38.25	Arachthos-Mündung	77.5499
47.8333	38.25	Arachthos-Mündung	47.4167	37.9167	Nikopolis* am Ambrakischen Golf	233.811
47.4167	37.9167	Nikopolis* am Ambrakischen Golf	47.25	37.9167	Hafen von Elaia	65.7421
47.25	37.9167	Hafen von Elaia	47.1667	38	Acheron-Mündung	53.0603
47.1667	38	Acheron-Mündung	46.8333	38	Sybota	131.335
46.8333	38	Sybota	46.75	38	Torone	32.8338
46.75	38	Torone	46.75	38.0833	Thyamis-Mündung	41.6667
46.75	38.0833	Thyamis-Mündung	46.1667	38	Kap Thyamis	233.454
46.1667	38	Kap Thyamis	46.1667	38.3333	Schlammhafen	166.667
46.1667	38.3333	Schlammhafen	45.8333	38.3333	Buthroton	130.736
45.8333	38.3333	Buthroton	45.75	38.1667	Kap Poseidion	89.5273
45.75	38.1667	Kap Poseidion	45.5	38.4167	Kassiope	158.903
45.5	38.4167	Kassiope	45.3333	38.5833	Onchesmos	105.819
45.3333	38.5833	Onchesmos	45	38.6667	Panormos	136.712
45	38.6667	Panormos	44.4167	39.1667	Akrokeraunische Berge (Spitze)	337.636
44.4167	39.1667	Akrokeraunische Berge (Spitze)	45	39.25	Orikon	229.807
45	39.25	Orikon	45	39.3333	Kelydnos-Mündung	41.6667
45	39.3333	Kelydnos-Mündung	44.9167	39.5	Amantia	89.3343
44.9167	39.5	Amantia	45	39.75	Bullis	129.054
45	39.75	Bullis	44.8333	39.9167	Aulon	105.069
44.8333	39.9167	Aulon	45	40	Aoos-Mündung	76.2643
45	40	Aoos-Mündung	45.0833	40.1667	Apollonia	89.223
45.0833	40.1667	Apollonia	45.0833	40.5	Apsos-Mündung	166.667
45.0833	40.5	Apsos-Mündung	45	40.6667	Panusos-Mündung	89.1392
45	40.6667	Panusos-Mündung	45	40.9167	Dyrrhachion*	125
45	40.9167	Dyrrhachion*	45	41	Illyricum (südlicher Endpunkt an der Adria)	41.6667
45	41	Illyricum (südlicher Endpunkt an der Adria)	45	41.1667	Lissus	83.3333
45	41.1667	Lissus	45	41.3333	Drilon-Mündung	83.3333
45	41.3333	Drilon-Mündung	45	41.6667	Ulcinium	166.667
45	41.6667	Ulcinium	45	41.75	Butua	41.6667
45	41.75	Butua	45	42	Golf von Rhizon	125
45	42	Golf von Rhizon	44.75	42	Acruvium	92.8931
44.75	42	Acruvium	44.6667	42.25	Risinum	128.763
44.6667	42.25	Risinum	44.6667	42.3333	Epidaurum	41.6667
44.6667	42.3333	Epidaurum	44.5	42.3333	Naro-Mündung	61.6033
44.5	42.3333	Naro-Mündung	44	42.5	Oneum	202.505
44	42.5	Oneum	44	42.75	Pituntium	125
44	42.75	Pituntium	43.6667	43.3333	Epetium	316.08
43.6667	43.3333	Epetium	43.5	43.1667	Salonae*	103.095
43.5	43.1667	Salonae*	43	43.3333	Sicun	200.255
43	43.3333	Sicun	42.6667	43.5	Scardona	146.971
42.6667	43.5	Scardona	42.3333	43.6667	Titus-Mündung	146.696
42.3333	43.6667	Titus-Mündung	42	43.75	Iader*	127.479
42	43.75	Iader*	41.5	44	Aenona	219.321
41.5	44	Aenona	41.1667	44	Corinium	119.89
41.1667	44	Corinium	40.75	44.1667	Argyruntum	171.289
40.75	44.1667	Argyruntum	40.3333	44.5	Vegium	223.571
40.3333	44.5	Vegium	40	44.5	Ortopla	118.875
40	44.5	Ortopla	39.3333	44.5	Tedmeius-Mündung	237.749
39.3333	44.5	Tedmeius-Mündung	39.25	44.6667	Lopsica	88.4597
39.25	44.6667	Lopsica	39	44.6667	Senia	88.901
39	44.6667	Senia	38.5	44.8333	Volcera	196.13
38.5	44.8333	Volcera	38	44.75	Oineus-Mündung	182.245
38	44.75	Oineus-Mündung	37.6667	44.8333	Tarsatica	125.403
37.6667	44.8333	Tarsatica	37	44.8333	Flanona	236.386
37	44.8333	Flanona	36.8333	44.8333	Alvona	59.0967
36.8333	44.8333	Alvona	36.5	44.8333	Illyricum (westlicher Endpunkt an der Adria)	118.193
36.5	44.8333	Illyricum (westlicher Endpunkt an der Adria)	36.25	44.9167	Nesactum (Ende Italiens)	97.8912
36.25	44.9167	Nesactum (Ende Italiens)	36	44.6667	Pola	153.278
36	44.6667	Pola	35.5	44.9167	Parentium	217.03
35.5	44.9167	Parentium	35	44.9167	Formio-Mündung	177.033
35	44.9167	Formio-Mündung	34.5	44.9167	Tergeste	177.033
34.5	44.9167	Tergeste	34	44.8333	Natiso-Mündung	181.995
34	44.8333	Natiso-Mündung	33	44.6667	Tiliaventum-Mündung	364.737
33	44.6667	Tiliaventum-Mündung	34	44.1667	Atrianus-Mündung	435.936
34	44.1667	Atrianus-Mündung	34.75	44	Padus-Mündung	281.968
34.75	44	Padus-Mündung	34.6667	44	Ravenna*	29.9725
34.6667	44	Ravenna*	34.9167	43.9167	Rubico-Mündung	99.1595
34.9167	43.9167	Rubico-Mündung	35	43.8333	Ariminum	51.3639
35	43.8333	Ariminum	35.3333	43.75	Pisaurum	127.321
35.3333	43.75	Pisaurum	35.6667	43.75	Fanum Fortunae	120.394
35.6667	43.75	Fanum Fortunae	36	43.6667	Sena Gallica	127.479
36	43.6667	Sena Gallica	36.3333	43.6667	Aesis-Mündung	120.561
36.3333	43.6667	Aesis-Mündung	36.5	43.6667	Ancona*	60.2807
36.5	43.6667	Ancona*	36.8333	43.3333	Numana	205.897
36.8333	43.3333	Numana	37.25	43.3333	Potentia	151.536
37.25	43.3333	Potentia	37.6667	43.3333	Truentus-Mündung	151.536
37.6667	43.3333	Truentus-Mündung	38	43.1667	Cupra Maritima	147.245
38	43.1667	Cupra Maritima	38.5	43	Castrum	200.707
38.5	43	Castrum	39.3333	42.75	Batrinus-Mündung	329.943
39.3333	42.75	Batrinus-Mündung	40.5	42.5	Aternus-Mündung	447.045
40.5	42.5	Aternus-Mündung	40.75	42.25	Ortona	155.41
40.75	42.25	Ortona	41.3333	42	Sagrus-Mündung	249.841
41.3333	42	Sagrus-Mündung	41.5	41.75	Histonium	139.554
41.5	41.75	Histonium	41.6667	41.6667	Buca	74.876
41.6667	41.6667	Buca	42	41.5	Tifernus-Mündung	149.953
42	41.5	Tifernus-Mündung	42.1667	41.25	Uria	139.769
42.1667	41.25	Uria	42.3333	41	Garganus	139.876
42.3333	41	Garganus	42.3333	40.75	Apenesteum	125
42.3333	40.75	Apenesteum	42.3333	40.5	Sipontum	125
42.3333	40.5	Sipontum	42.3333	40.3333	Salpia	83.3333
42.3333	40.3333	Salpia	42.5	40.25	Aufidus-Mündung	76.0028
42.5	40.25	Aufidus-Mündung	42.3333	40.0833	Barium	104.879
42.3333	40.0833	Barium	42.5	39.8333	Egnatia	140.375
42.5	39.8333	Egnatia	42.5	39.6667	Brundisium*	83.3333
42.5	39.6667	Brundisium*	42.6667	39.25	Lupiae	218.042
42.6667	39.25	Lupiae	43	39.0833	Hydruntum	153.759
43	39.0833	Hydruntum	42.3333	38.75	Kap Iapygia	308.287
42.3333	38.75	Kap Iapygia	41.5	40	Taras (Kanon poleis episemoi)	703.102
41.5	40	Taras (Kanon poleis episemoi)	41.5	39.1667	Croto	416.667
41.5	39.1667	Croto	41.5	38.75	Kap Lacinium	208.333
41.5	38.75	Kap Lacinium	40.75	38.8333	Golf von Scolacium (innerster Punkt)	295.24
40.75	38.8333	Golf von Scolacium (innerster Punkt)	40.75	38.75	Scolacium	41.6667
40.75	38.75	Scolacium	40.8333	38.4167	Locanus-Mündung	169.819
40.8333	38.4167	Locanus-Mündung	40.75	38.4167	Locri	32.6464
40.75	38.4167	Locri	40.5	38.0833	Kap Zephyrion	193.427
40.5	38.0833	Kap Zephyrion	39.8333	38	Kap Leukopetra	265.806
39.8333	38	Kap Leukopetra	39.8333	38.25	Regium Iulium	125
39.8333	38.25	Regium Iulium	39.75	38.3333	Kap Skylla	52.9677
39.75	38.3333	Kap Skylla	40.3333	38.75	Golf von Hippo	308.941
40.3333	38.75	Golf von Hippo	40.3333	38.8333	Taurische Klippe	41.6667
40.3333	38.8333	Taurische Klippe	40	39.1667	Tempsa	211.079
40	39.1667	Tempsa	40	39.25	Laus-Mündung	41.6667
40	39.25	Laus-Mündung	40	39.5	Buxentum	125
40	39.5	Buxentum	40.3333	39.75	Velia	179.177
40.3333	39.75	Velia	40.1667	40	Paestum	140.41
40.1667	40	Paestum	40.0833	40.25	Silerus-Mündung	128.996
40.0833	40.25	Silerus-Mündung	40	40.5	Salernum	128.967
40	40.5	Salernum	40	40.6667	Surrentum	83.3333
40	40.6667	Surrentum	40.0833	40.9167	Sarnus-Mündung	128.919
40.0833	40.9167	Sarnus-Mündung	40	40.9167	Neapolis*	31.486
40	40.9167	Neapolis*	39.8333	41	Puteoli	75.4756
39.8333	41	Puteoli	39.5	41	Misenum	125.785
39.5	41	Misenum	39.3333	41.1667	Cumae	104.355
39.3333	41.1667	Cumae	39.1667	41.1667	Liternum	62.7332
39.1667	41.1667	Liternum	38.75	41.0833	Volturnum	162.37
38.75	41.0833	Volturnum	38.5	41.3333	Sinuessa	156.424
38.5	41.3333	Sinuessa	38.3333	41.25	Liris-Mündung	75.21
38.3333	41.25	Liris-Mündung	38.1667	41.25	Formiae	62.6533
38.1667	41.25	Formiae	37.75	41.25	Tarracinae*	156.633
37.75	41.25	Tarracinae*	37.5	41.1667	Kap Kirke	102.857
37.5	41.1667	Kap Kirke	37.1667	41.3333	Clostra	150.486
37.1667	41.3333	Clostra	36.8333	41.3333	Antium	125.147
36.8333	41.3333	Antium	36.5	41.5	Ostia	150.22
36.5	41.5	Ostia	36.3333	41.5	Tiberis-Mündung	62.413
36.3333	41.5	Tiberis-Mündung	36.25	41.5	Alsium	31.2065
36.25	41.5	Alsium	36	41.5	Pyrgi	93.6194
36	41.5	Pyrgi	35.6667	41.6667	Castrum Novum	149.953
35.6667	41.6667	Castrum Novum	35.3333	41.75	Graviscae	131.215
35.3333	41.75	Graviscae	35	41.9167	Cosa	149.551
35	41.9167	Cosa	34.5	42	Osa-Mündung	190.52
34.5	42	Osa-Mündung	34.25	42	Kap Telamo	92.8931
34.25	42	Kap Telamo	34.1667	42.5	Trajans-Hafen	251.895
34.1667	42.5	Trajans-Hafen	33.8333	42.3333	Kap Populonium	148.607
33.8333	42.3333	Kap Populonium	33.5	42.5	Populonium	148.607
33.5	42.5	Populonium	33.3333	42.6667	Arnus-Mündung	103.485
33.3333	42.6667	Arnus-Mündung	32.6667	42.75	Hercules-Heiligtum	248.457
32.6667	42.75	Hercules-Heiligtum	32	42.6667	Kap Luna	248.457
32	42.6667	Kap Luna	32	42.75	Luna	41.6667
32	42.75	Luna	30.8333	42.75	Macra-Mündung	428.351
30.8333	42.75	Macra-Mündung	30.5	42.9167	Tigullia	147.928
30.5	42.9167	Tigullia	30.5	42.8333	Entella-Mündung	41.6667
30.5	42.8333	Entella-Mündung	30	42.8333	Genua	183.333
30	42.8333	Genua	29.5	42.75	Albingaunum	188.129
29.5	42.75	Albingaunum	29.1667	42.75	Albintimilium	122.387
29.1667	42.75	Albintimilium	28.6667	42.6667	Monoeci Portus	188.37
28.6667	42.6667	Monoeci Portus	28.5	42.5	Tropaea Augusti	103.485
28.5	42.5	Tropaea Augusti	28.25	42.75	Hercules-Hafen	155.191
28.25	42.75	Hercules-Hafen	28	43.4167	Nicaea*	345.609
28	43.4167	Nicaea*	27.5	43	Varus-Mündung	276.777
27.5	43	Varus-Mündung	27	43	Antipolis	182.838
27	43	Antipolis	26.5	42.8333	Forum Iulii	201.159
26.5	42.8333	Forum Iulii	25.6667	42.75	Argenteus-Mündung	308.587
25.6667	42.75	Argenteus-Mündung	25.1667	42.75	Olbia	183.58
25.1667	42.75	Olbia	25	42.6667	Kap Citharistes	74.0661
25	42.6667	Kap Citharistes	24.6667	42.8333	Tauroentium	148.064
24.6667	42.8333	Tauroentium	24.5	43.0833	Massilia*	139.084
24.5	43.0833	Massilia*	23.75	43	Caenua-Mündung	277.22
23.75	43	Caenua-Mündung	23.5	43.0833	Maritima	100.41
23.5	43.0833	Maritima	23	42.8333	Rhodanus-Mündung(östliche)	221.585
23	42.8333	Rhodanus-Mündung(östliche)	22.8333	42.6667	Rhodanus-Mündung(westliche)	103.388
22.8333	42.6667	Rhodanus-Mündung(westliche)	22.6667	42.6667	Fossae Marianae	61.2757
22.6667	42.6667	Fossae Marianae	22.5	42.5	Setius	103.485
22.5	42.5	Setius	22.25	42.8333	Agatha	190.331
22.25	42.8333	Agatha	22	42.8333	Arauris-Mündung	91.6668
22	42.8333	Arauris-Mündung	21.75	42.75	Orobis-Mündung	100.748
21.75	42.75	Orobis-Mündung	21.5	42.75	Atax-Mündung	91.7903
21.5	42.75	Atax-Mündung	21.25	42.75	Ruscino-Mündung	91.7903
21.25	42.75	Ruscino-Mündung	21	42.6667	Illiberis-Mündung	100.861
21	42.6667	Illiberis-Mündung	20.3333	42.3333	Heiligtum der Venus	296.942
20.3333	42.3333	Heiligtum der Venus	19.5	42.5	Rhode	318.694
19.5	42.5	Rhode	19	42.5	Clodianus-Mündung	184.319
19	42.5	Clodianus-Mündung	18.75	42.3333	Emporiae	124.34
18.75	42.3333	Emporiae	18.5	42.1667	Sambroca-Mündung	124.522
18.5	42.1667	Sambroca-Mündung	18.25	42	Blanda	124.703
18.25	42	Blanda	18	41.75	Iluro	155.846
18	41.75	Iluro	18.5	41.3333	Kap Lunarium	280.028
18.5	41.3333	Kap Lunarium	17.8333	41.3333	Baetulo	250.293
17.8333	41.3333	Baetulo	17.5	41.25	Rubricatus-Mündung	131.977
17.5	41.25	Rubricatus-Mündung	17.25	41	Barcino	156.496
17.25	41	Barcino	16.8333	40.75	Subur	201.097
16.8333	40.75	Subur	16.3333	40.6667	Tarraco*	194.036
16.3333	40.6667	Tarraco*	16	40.5	Iberus-Mündung	151.546
16	40.5	Iberus-Mündung	15.5	40	Tenebrius-Hafen	314.495
15.5	40	Tenebrius-Hafen	15.8333	39.3333	Kap Tenebrium	357.17
15.8333	39.3333	Kap Tenebrium	15.0833	39.5	Dianium	301.452
15.0833	39.5	Dianium	15	39	Turia-Mündung	252.074
15	39	Turia-Mündung	14.5	38.9167	Pallantia-Mündung	198.816
14.5	38.9167	Pallantia-Mündung	14	38.8333	Sucro-Mündung	199.039
14	38.8333	Sucro-Mündung	13.5	38.75	Ilicitanus-Hafen	199.262
13.5	38.75	Ilicitanus-Hafen	13	38.75	Saetabis-Mündung	194.971
13	38.75	Saetabis-Mündung	12.5	38.5833	Alonis	212.242
12.5	38.5833	Alonis	12.5	38.5	Tader-Mündung	41.6667
12.5	38.5	Tader-Mündung	12.5	38.1667	Kap Scombraria	166.667
12.5	38.1667	Kap Scombraria	12.25	37.9167	Carthago Nova*	159.111
12.25	37.9167	Carthago Nova*	12.1667	37.5	Lucentum	210.925
12.1667	37.5	Lucentum	12	37.4167	Urci	78.1785
12	37.4167	Urci	12	37.25	Baetica (Ostende am Baliarischen Meer)	83.3333
12	37.25	Baetica (Ostende am Baliarischen Meer)	11.75	37.1667	Baria	107.923
11.75	37.1667	Baria	11.5	36.8333	Kap des Charidemus	194.277
11.5	36.8333	Kap des Charidemus	11.3333	37.0833	Portus Magnus	141.63
11.3333	37.0833	Portus Magnus	10.75	37.1667	Abdara	236.255
10.75	37.1667	Abdara	10.25	37.25	Selambina	203.423
10.25	37.25	Selambina	9.75	37.25	Sexi	199
9.75	37.25	Sexi	9.25	37.1667	Maenoba	203.423
9.25	37.1667	Maenoba	8.83333	37.1667	Malaca	166.017
8.83333	37.1667	Malaca	8.5	37	Salduba-Mündung	156.916
8.5	37	Salduba-Mündung	8	36.9167	Suel	204.067
8	36.9167	Suel	7.66667	36.6667	Barbesula-Mündung	182.864
7.66667	36.6667	Barbesula-Mündung	7.5	36.25	Calpe	218.849
7.5	36.25	Calpe	7.5	36.1667	Carteia	41.6667
7.5	36.1667	Carteia	7.25	36.5	Barbesula	194.725
7.25	36.5	Barbesula	6.83333	36.0833	Iulia Traducta	267.581
6.83333	36.0833	Iulia Traducta	6.5	36.1667	Mellaria	140.923
6.5	36.1667	Mellaria	6.25	36.0833	Baelo	109.226
6.25	36.0833	Baelo	6.16667	36.0833	Baelo-Mündung	33.6734
6.16667	36.0833	Baelo-Mündung	5.75	36.0833	Hera-Tempel	168.367
5.75	36.0833	Hera-Tempel	6	36.3333	Menestheus-Hafen	160.616
6	36.3333	Menestheus-Hafen	6	36.75	Ästuarbei Asta	208.333
6	36.75	Ästuarbei Asta	5.33333	37	Baetis-Mündung (östliche)	294.493
5.33333	37	Baetis-Mündung (östliche)	5.08333	37.1667	Baetis-Mündung (westliche)	129.956
5.08333	37.1667	Baetis-Mündung (westliche)	4.66667	37.3333	Onoba Ästuaria	185.594
4.66667	37.3333	Onoba Ästuaria	4.33333	37.5	Anas-Mündung (östliche)	156.419
4.33333	37.5	Anas-Mündung (östliche)	4.08333	37.6667	Anas-Mündung (westliche)	129.449
4.08333	37.6667	Anas-Mündung (westliche)	3.66667	37.75	Balsa	170.005
3.66667	37.75	Balsa	3	37.9167	Ossonoba	276.14
3	37.9167	Ossonoba	2.5	38.25	Heiliges Kap	257.874
2.5	38.25	Heiliges Kap	5	39	Calopus-Mündung	1046.04
5	39	Calopus-Mündung	5.08333	39.4167	Salacia	210.82
5.08333	39.4167	Salacia	4.91667	39.8333	Caetobriga	217.997
4.91667	39.8333	Caetobriga	4.83333	39.8333	Kap Barbarium	31.9963
4.83333	39.8333	Kap Barbarium	5.16667	40.25	Olisipo	244.302
5.16667	40.25	Olisipo	5.5	40.1667	Tagus-Mündung	133.93
5.5	40.1667	Tagus-Mündung	5	40.6667	Berg der Selene	314.209
5	40.6667	Berg der Selene	5.16667	40.8333	Munda-Mündung	104.546
5.16667	40.8333	Munda-Mündung	5.5	41.3333	Vacua-Mündung	279.788
5.5	41.3333	Vacua-Mündung	5.33333	41.8333	Durius-Mündung	257.653
5.33333	41.8333	Durius-Mündung	5.5	42.25	Avus-Mündung	217.331
5.5	42.25	Avus-Mündung	5.167	42.5	Kap Avarum	175.369
5.167	42.5	Kap Avarum	5.66667	42.75	Nebis-Mündung	222.3
5.66667	42.75	Nebis-Mündung	5.5	43.25	Limia-Mündung	257.321
5.5	43.25	Limia-Mündung	5.33333	43.6667	Minius-Mündung	216.937
5.33333	43.6667	Minius-Mündung	5.5	44	Kap Orubium	177.176
5.5	44	Kap Orubium	5.66667	44.3333	Ulla-Mündung	177.062
5.66667	44.3333	Ulla-Mündung	5.66667	44.6667	Tamaris-Mündung	166.667
5.66667	44.6667	Tamaris-Mündung	5.66667	45	Hafen der Artabrer	166.667
5.66667	45	Hafen der Artabrer	5.25	45.1667	Kap Nerium	169.064
5.25	45.1667	Kap Nerium	5.66667	45.1667	Altäre des Sestius	146.885
5.66667	45.1667	Altäre des Sestius	6.25	45.5	Vir-Mündung	264.229
6.25	45.5	Vir-Mündung	6.5	45.5	Nächstes Kap	87.6136
6.5	45.5	Nächstes Kap	6.75	45	Flavium Brigantium	265.036
6.75	45	Flavium Brigantium	8.25	45.8333	Kap Lapatia Coru	671.374
8.25	45.8333	Kap Lapatia Coru	9	45.75	Mearus-Mündung	264.774
9	45.75	Mearus-Mündung	10.3333	45.6667	Nabius-Mündung	467.396
10.3333	45.6667	Nabius-Mündung	11.6667	45.75	Navia-Mündung	467.396
11.6667	45.75	Navia-Mündung	11.75	45.4167	Flavionavia	169.199
11.75	45.4167	Flavionavia	12	45.1667	Naelo	152.833
12	45.1667	Naelo	13	45.5	Noega Ucesia	388.999
13	45.5	Noega Ucesia	13.1667	44.6667	Nerva-Mündung	420.8
13.1667	44.6667	Nerva-Mündung	13.5	44.25	Flaviobriga	239.904
13.5	44.25	Flaviobriga	13.8333	44.0833	Deva-Mündung	145.73
13.8333	44.0833	Deva-Mündung	14.3333	45	Menosca	491.749
14.3333	45	Menosca	15.1667	45.0833	Oiarso	297.346
15.1667	45.0833	Oiarso	15.1667	45.8333	Kap Oiarso	375
15.1667	45.8333	Kap Oiarso	16.75	44.75	Aturus-Mündung	776.874
16.75	44.75	Aturus-Mündung	17	45.3333	Sigmatis-Mündung	304.746
17	45.3333	Sigmatis-Mündung	16.5	46	Kap Curianum	376.341
16.5	46	Kap Curianum	17.5	46.5	Garumna-Mündung	426.665
17.5	46.5	Garumna-Mündung	16.5	46.75	Hafen der Santonen	365.426
16.5	46.75	Hafen der Santonen	16.5	46.75	Kap der Santonen	0.000426887
16.5	46.75	Kap der Santonen	17.25	47.75	Carantonus-Mündung	561.06
17.25	47.75	Carantonus-Mündung	17	48	Kap Pictonium	150.515
17	48	Kap Pictonium	17.5	48.25	Sicor-Hafen	208.501
17.5	48.25	Sicor-Hafen	17.6667	48.5	Liger-Mündung	136.708
17.6667	48.5	Liger-Mündung	17.6667	48.75	Brivates-Hafen	125
17.6667	48.75	Brivates-Hafen	17	49.25	Herius-Mündung	332.147
17	49.25	Herius-Mündung	16.5	49.6667	Vidana-Hafen	264.213
16.5	49.6667	Vidana-Hafen	15.25	49.75	Kap Gabaeum	406.312
15.25	49.75	Kap Gabaeum	16.5	50	Salioncanus-Hafen	421.73
16.5	50	Salioncanus-Hafen	17.3333	50.3333	Titus-Mündung	314.66
17.3333	50.3333	Titus-Mündung	18.8333	50.8333	Cruciatonnum	537.835
18.8333	50.8333	Cruciatonnum	18.75	51	Olina-Mündung	87.3756
18.75	51	Olina-Mündung	19.5	51.1667	Noviomagus	249.875
19.5	51.1667	Noviomagus	20	51.1667	Sequana-Mündung	156.764
20	51.1667	Sequana-Mündung	21.75	52.3333	Frudis-Mündung	796.022
21.75	52.3333	Frudis-Mündung	22.25	53.5	Kap Itium	602.492
22.25	53.5	Kap Itium	22.5	53.5	Gerosiacum*	74.3528
22.5	53.5	Gerosiacum*	24.6667	53.5	Mosa-Mündung	644.367
24.6667	53.5	Mosa-Mündung	26.5	53.3333	Lugdunum	552.628
26.5	53.3333	Lugdunum	26.75	53.3333	Rhenus-Mündung (westliche)	74.6448

## Sheet: Omega distances
From			To
longitude	latitude	Place name	longitude	latitude	Place name	Distance
6.5	35.9167	Tingis Caesarea*	7	35.8333	Ualon-Mündung	206.815
7	35.8333	Ualon-Mündung	7.5	35.9167	Exilissa	206.815
7.5	35.9167	Exilissa	7.66667	35.8333	Heptadelphoi-Gebirge	79.3455
7.66667	35.8333	Heptadelphoi-Gebirge	7.83333	35.6667	Abyle	107.324
7.83333	35.6667	Abyle	8	35.5	Kap des Phoibos	107.413
8	35.5	Kap des Phoibos	8.33333	35.0833	Iagath	248.814
8.33333	35.0833	Iagath	8.5	35	Thaluda-Mündung	79.9447
8.5	35	Thaluda-Mündung	8.83333	35.1667	Kap Oleastron	159.83
8.83333	35.1667	Kap Oleastron	9	34.9167	Akrath	142.408
9	34.9167	Akrath	9.5	34.5	Taenia Longa	292.641
9.5	34.5	Taenia Longa	10	35	Kap Sestiaria	323.563
10	35	Kap Sestiaria	10.1667	34.75	Rusaddir	142.475
10.1667	34.75	Rusaddir	10.5	34.9167	Kap Metagonion	160.186
10.5	34.9167	Kap Metagonion	10.75	34.75	Molachath-Mündung	132.18
10.75	34.75	Molachath-Mündung	11.1667	34.8333	Malua-Mündung	176.09
11.1667	34.8333	Malua-Mündung	11.5	35	Grosses Kap	160.067
11.5	35	Grosses Kap	11.8333	34.75	Gypsaria	185.259
11.8333	34.75	Gypsaria	12	34.6667	Siga	80.1814
12	34.6667	Siga	12.25	34.6667	Siga-Mündung	102.809
12.25	34.6667	Siga-Mündung	12.5	34.5	Asarath-Mündung	132.421
12.5	34.5	Asarath-Mündung	12.75	34.5	Portus Magnus	103.016
12.75	34.5	Portus Magnus	13	34	Chylemath-Mündung	270.51
13	34	Chylemath-Mündung	13.3333	34	Quiza	138.173
13.3333	34	Quiza	13.5	33.75	Portus Divinus	142.87
13.5	33.75	Portus Divinus	13.8333	33.8333	Arsenaria	144.642
13.8333	33.8333	Arsenaria	14.25	33.6667	Kartennos-Mündung	192.225
14.25	33.6667	Kartennos-Mündung	14.5	33.6667	Cartennae*	104.035
14.5	33.6667	Cartennae*	14.8333	33.6667	Karepula	138.713
14.8333	33.6667	Karepula	15.5	33.5	Gunugu	289.928
15.5	33.5	Gunugu	15.5	33.6667	Kap des Apollon	83.3333
15.5	33.6667	Kap des Apollon	15.8333	33.5833	Castra Germanorum	144.9
15.8333	33.5833	Castra Germanorum	16.1667	33.5	Kanukis	145.028
16.1667	33.5	Kanukis	16.6667	33.3333	Chinalaph-Mündung	224.696
16.6667	33.3333	Chinalaph-Mündung	17	33.3333	Iol Caesarea*	139.248
17	33.3333	Iol Caesarea*	17.5	33.5	Tipasa	224.696
17.5	33.5	Tipasa	17.6667	33	Via	259.532
17.6667	33	Via	18	33	Icosium	139.778
18	33	Icosium	18.1667	33.3333	Sauos-Mündung	180.676
18.1667	33.3333	Sauos-Mündung	18.5	32.75	Rusguniae	323.402
18.5	32.75	Rusguniae	18.75	32.833	Rusikibar	112.979
18.75	32.833	Rusikibar	19.167	32.917	Modunga	180.076
19.167	32.917	Modunga	19.5	32.8333	Serbes-Mündung	145.959
19.5	32.8333	Serbes-Mündung	19.75	32.8333	Cissi	105.031
19.75	32.8333	Cissi	20	32.8333	Addyme	105.031
20	32.8333	Addyme	20.25	32.75	Rusuccuru	113.04
20.25	32.75	Rusuccuru	20.5	32.75	Iomnion	105.13
20.5	32.75	Iomnion	20.75	32.6667	Rusubisir	113.131
20.75	32.6667	Rusubisir	21	32.6667	Rusazus	105.228
21	32.6667	Rusazus	21.5	32.5	Uabar	226.536
21.5	32.5	Uabar	22	32.5	Saldae*	210.848
22	32.5	Saldae*	22.1667	32.5	Nasavath-Mündung	70.2826
22.1667	32.5	Nasavath-Mündung	22.6667	32.3333	Choba	226.9
22.6667	32.3333	Choba	23	32.25	Sisar-Mündung	146.922
23	32.25	Sisar-Mündung	23.3333	32.0833	Iarsath	163.857
23.3333	32.0833	Iarsath	23.6667	32.25	Kap Audon	163.857
23.6667	32.25	Kap Audon	23.8333	32	Audos-Mündung	143.547
23.8333	32	Audos-Mündung	24	31.75	Igilgili	143.642
24	31.75	Igilgili	24.6667	31.8333	Gulos-Mündung	286.37
24.6667	31.8333	Gulos-Mündung	25.1667	31.75	Assarath	216.539
25.1667	31.75	Assarath	26.25	31.75	Ampsaga-Mündung	460.606
26.25	31.75	Ampsaga-Mündung	27	31.75	Winkel des Numidischen Golfes	318.881
27	31.75	Winkel des Numidischen Golfes	27.3333	32.3333	Chullu	324.081
27.3333	32.3333	Chullu	27.6667	32.5	Rusicade	163.522
27.6667	32.5	Rusicade	27.75	32.75	Kap Treton	129.832
27.75	32.75	Kap Treton	28.167	32.5	Uzikath	215.548
28.167	32.5	Uzikath	28.6667	32	Holkachites-Golf	327.327
28.6667	32	Holkachites-Golf	29	32.5	Takatye	286.998
29	32.5	Takatye	29.3333	32.5833	Kollops Mikros	146.548
29.3333	32.5833	Kollops Mikros	29.6667	32.6667	Siur	146.423
29.6667	32.6667	Siur	30	32.75	Hippu Akra	146.298
30	32.75	Hippu Akra	30.1667	32.6667	Kap Stoborron	81.5649
30.1667	32.6667	Kap Stoborron	30.3333	32.5	Aphrodision	108.972
30.3333	32.5	Aphrodision	30.5	32.25	Hippo Regius	143.452
30.5	32.25	Hippo Regius	30.75	32.25	Rubricatus-Mündung	105.716
30.75	32.25	Rubricatus-Mündung	31.25	32.3333	Thabraka*	215.403
31.25	32.3333	Thabraka*	31.6667	32.8333	Heiligtum des Apollon	305.475
31.6667	32.8333	Heiligtum des Apollon	32	32.75	Altäre des Poseidon	146.172
32	32.75	Altäre des Poseidon	32.5	32.75	Hippon Diarrhytos	210.26
32.5	32.75	Hippon Diarrhytos	33	32.5	Thinissa	244.863
33	32.5	Thinissa	33.5	33.25	Kap des Apollon	429.777
33.5	33.25	Kap des Apollon	33.6667	32.75	Utica*	259.585
33.6667	32.75	Utica*	33.6667	32.5	Lager des Cornelius	125
33.6667	32.5	Lager des Cornelius	34	32.6667	Bagradas-Mündung	163.298
34	32.6667	Bagradas-Mündung	34.8333	32.6667	Karchedon*	350.759
34.8333	32.6667	Karchedon*	34.8333	32.5	Katadas-Mündung	83.3333
34.8333	32.5	Katadas-Mündung	35	32.6667	Maxula	108.972
35	32.6667	Maxula	35	33	Carpis	166.667
35	33	Carpis	35	33.1667	Missua	83.3333
35	33.1667	Missua	35	33.3333	Clupea	83.3333
35	33.3333	Clupea	35	33.5833	Kap Hermaia	125
35	33.5833	Kap Hermaia	35.3333	33.3333	Aspis	186.974
35.3333	33.3333	Aspis	35.5	33.1667	Curubis	108.633
35.5	33.1667	Curubis	35.75	33	Neapolis	133.842
35.75	33	Neapolis	36	32.8333	Siagul	133.997
36	32.8333	Siagul	36.25	32.6667	Aphrodision	134.152
36.25	32.6667	Aphrodision	36.6667	32.6667	Hadrumetum*	175.38
36.6667	32.6667	Hadrumetum*	36.8333	32.8333	Ruspina	108.888
36.8333	32.8333	Ruspina	37.1667	32.5833	Leptis Minor	187.861
37.1667	32.5833	Leptis Minor	37.5	32.5	Thapsos	146.548
37.5	32.5	Thapsos	37.75	32.75	Acholla	163.427
37.75	32.75	Acholla	38	32.333	Ruspe	233.615
38	32.333	Ruspe	38.5	32.3333	Kap Brachodes	211.238
38.5	32.3333	Kap Brachodes	38.1667	32.1667	Usilla	163.746
38.1667	32.1667	Usilla	38.5	32	Taphrura	163.968
38.5	32	Taphrura	38.5	31.6667	Thenai	166.667
38.5	31.6667	Thenai	38.5	31.25	Makomada	208.333
38.5	31.25	Makomada	38.6667	30.75	Triton-Mündung	260.004
38.6667	30.75	Triton-Mündung	38.8333	30.5	Takape	144.109
38.8333	30.5	Takape	39.3333	30.8333	Gigthis	272.063
39.3333	30.8333	Gigthis	40.167	31.25	Hedaphtha	413.461
40.167	31.25	Hedaphtha	40.6667	31.6667	Kap Zita	298.026
40.6667	31.6667	Kap Zita	41	31.5	Sabratha	164.629
41	31.5	Sabratha	41.25	31.5	Pisidon	106.58
41.25	31.5	Pisidon	41.5	31.6667	Oea	135.216
41.5	31.6667	Oea	41.75	31.6667	Garapha	106.39
41.75	31.6667	Garapha	42	31.6667	Leptis Magna*	106.39
42	31.6667	Leptis Magna*	42.25	31.1667	Kinyps-Mündung	271.808
42.25	31.1667	Kinyps-Mündung	42.6667	31.1667	Barathia	178.264
42.6667	31.1667	Barathia	42.9167	31.3333	Kap Treeron	135.515
42.9167	31.3333	Kap Treeron	43.25	31	Kisternai	219.352
43.25	31	Kisternai	43.6667	31	Kap Kephalai	178.576
43.6667	31	Kap Kephalai	43.5	30.75	Makomaka	144.016
43.5	30.75	Makomaka	43.6667	30.3333	Aspis	220.349
43.6667	30.3333	Aspis	43.9167	30	Zagazaena	198.638
43.9167	30	Zagazaena	44.1667	29.6667	Euphrantas Pyrgos	198.836
44.1667	29.6667	Euphrantas Pyrgos	44.5	29	Pharaxa	363.623
44.5	29	Pharaxa	45	29	Oisporis	218.655
45	29	Oisporis	46	29	Hippu Akra	437.309
46	29	Hippu Akra	46.75	29	Arae Philaenorum	327.982
46.75	29	Arae Philaenorum	47.0833	29.1667	Festung Automala	167.806
47.0833	29.1667	Festung Automala	47.25	29.3333	Kap Drepanon	110.593
47.25	29.3333	Kap Drepanon	47.3333	29.6667	Hyphaloi	170.566
47.3333	29.6667	Hyphaloi	47.25	30	Diarrhoia	170.541
47.25	30	Diarrhoia	47.3333	30.5	Turm des Herakles	252.578
47.3333	30.5	Turm des Herakles	47.3333	30.8333	Festung Diachersis	166.667
47.3333	30.8333	Festung Diachersis	47.25	31.1667	Northern Cape	170.467
47.25	31.1667	Northern Cape	47.5	31.25	Bryon-Strand	114.738
47.5	31.25	Bryon-Strand	47.75	31.3333	Berenike*	114.656
47.75	31.3333	Berenike*	48.25	31.3333	Lathon-Mündung	213.539
48.25	31.3333	Lathon-Mündung	48.6667	31.3333	Arsinoe*	177.949
48.6667	31.3333	Arsinoe*	49.0833	31.1667	Ptolemaïs*	196.638
49.0833	31.1667	Ptolemaïs*	49.5	31.5	Ausigda	243.81
49.5	31.5	Ausigda	49.5	31.6667	Aptuchu Hieron	83.3333
49.5	31.6667	Aptuchu Hieron	50	31.8333	Kap des Phykes	228.337
50	31.8333	Kap des Phykes	50.1667	31.6667	Apollonia*	109.389
50.1667	31.6667	Apollonia*	50.3333	31.6667	Naustathmos	70.9264
50.3333	31.6667	Naustathmos	50.5	31.5	Erythron	109.471
50.5	31.5	Erythron	50.75	31.3333	Chersis	135.366
50.75	31.3333	Chersis	51	31.3333	Kap Zephyrion	106.77
51	31.3333	Kap Zephyrion	51.25	31.25	Darnis	114.656
51.25	31.25	Darnis	51.6667	31.25	Aziris	178.107
51.6667	31.25	Aziris	52	31.6667	Chersonesos Megale*	252.22
52	31.6667	Chersonesos Megale*	52.1667	31.25	Phthia	220.127
52.1667	31.25	Phthia	52.25	31.25	Paliuros	35.6213
52.25	31.25	Paliuros	52.5	31.25	Batrachos	106.864
52.5	31.25	Batrachos	52.75	31.25	Petra Mikra	106.864
52.75	31.25	Petra Mikra	53.1667	31.25	Antipyrgos	178.107
53.1667	31.25	Antipyrgos	53.5	31.1667	Skythranios	148.513
53.5	31.1667	Skythranios	53.75	31.3333	Kap Kataionion	135.515
53.75	31.3333	Kap Kataionion	54	31.25	Kap Ardanis	114.656
54	31.25	Kap Ardanis	54.1667	31.1667	Petra Megale	82.5597
54.1667	31.1667	Petra Megale	54.3333	31.1667	Panormos	71.3054
54.3333	31.1667	Panormos	54.5	31.25	Katabathmos Megas	82.5597
54.5	31.25	Katabathmos Megas	55	31.1667	Ainesisphyra	217.844
55	31.1667	Ainesisphyra	55.25	31.1667	Zygris	106.958
55.25	31.1667	Zygris	55.5	31.1667	Chettaia	106.958
55.5	31.1667	Chettaia	55.75	31.1667	Zagylis	106.958
55.75	31.1667	Zagylis	56	31.1667	Selinus	106.958
56	31.1667	Selinus	56.3333	31.0833	Dorf des Trisarchos	148.633
56.3333	31.0833	Dorf des Trisarchos	56.6667	31.0833	Apis-Heiligtum	142.736
56.6667	31.0833	Apis-Heiligtum	57	31.1667	Paraitonion*	148.633
57	31.1667	Paraitonion*	57.1667	31.1667	Kap Pythis	71.3055
57.1667	31.1667	Kap Pythis	57.3333	31.0833	Graias Gony	82.6138
57.3333	31.0833	Graias Gony	57.5	31.1667	Kap Kallias	82.6138
57.5	31.1667	Kap Kallias	57.6667	31.0833	Zygis	82.6139
57.6667	31.0833	Zygis	57.8333	31.1667	Leuke Akte	82.6139
57.8333	31.1667	Leuke Akte	58	31.25	Kap Hermaia	82.5597
58	31.25	Kap Hermaia	58.3333	31.1667	Phönizischer Hafen	148.513
58.3333	31.1667	Phönizischer Hafen	58.6667	31.0833	Antiphrai	148.633
58.6667	31.0833	Antiphrai	58.8333	31.4167	Kap Derris	181.255
58.8333	31.4167	Kap Derris	59	31.0833	Leukaspis	181.255
59	31.0833	Leukaspis	59.1667	31.25	Kap Glaukon	109.676
59.1667	31.25	Kap Glaukon	59.5	31.083	Cheimo	165.258
59.5	31.083	Cheimo	59.75	31	Plinthine	114.859
59.75	31	Plinthine	60	31.0833	Chersonesos Mikra	114.919
60	31.0833	Chersonesos Mikra	60.5	31	Alexandreia*	218.213
60.5	31	Alexandreia*	60.75	31.0833	Kanobos	114.919
60.75	31.0833	Kanobos	60.9167	31.0833	Herakleotische Mündung	71.3681
60.9167	31.0833	Herakleotische Mündung	61.25	31.0833	Bolbitinische Mündung	142.736
61.25	31.0833	Bolbitinische Mündung	61.5	31.0833	Sebennytische Mündung	107.052
61.5	31.0833	Sebennytische Mündung	61.75	31.0833	Pineptimi (Pseudo-Mündung)	107.052
61.75	31.0833	Pineptimi (Pseudo-Mündung)	62.1667	31.1667	Diolkos (Pseudo-Mündung)	183.145
62.1667	31.1667	Diolkos (Pseudo-Mündung)	62.5	31.1667	Pathmetische Mündung	142.611
62.5	31.1667	Pathmetische Mündung	62.75	31.1667	Mendesische Mündung	106.958
62.75	31.1667	Mendesische Mündung	63.0833	31.25	Tanitische Mündung	148.513
63.0833	31.25	Tanitische Mündung	63.25	31.1667	Pelusische Mündung	82.5597
63.25	31.1667	Pelusische Mündung	63.3333	31.25	Pelusion*	54.828
63.3333	31.25	Pelusion*	63.5833	31.3333	Gerron (Endpunkt der Kasiotis)	114.656
63.5833	31.3333	Gerron (Endpunkt der Kasiotis)	63.8333	31.25	Kasion	114.656
63.8333	31.25	Kasion	63.9167	31.1667	Sirbonis-See (Durchbruch)	54.828
63.9167	31.1667	Sirbonis-See (Durchbruch)	64.25	31.8333	Ostrakine	362.36
64.25	31.8333	Ostrakine	64.6667	31.8333	Rhinokorura	176.997
64.6667	31.8333	Rhinokorura	64.8333	31.6667	Anthedon	109.389
64.8333	31.6667	Anthedon	64.9167	31.5	Hafen der Gazaier	90.5778
64.9167	31.5	Hafen der Gazaier	65	31.6667	Askalon*	90.5778
65	31.6667	Askalon*	65.25	31.8333	Azotos	135.066
65.25	31.8333	Azotos	65	32	Hafen der Iamniten	134.915
65	32	Hafen der Iamniten	65.6667	32.0833	Ioppe	285.609
65.6667	32.0833	Ioppe	66	32.25	Apollonia	163.857
66	32.25	Apollonia	66.25	32.5	Kaisareia des Straton*	163.615
66.25	32.5	Kaisareia des Straton*	66.3333	32.5833	Chorseas-Mündung	54.4966
66.3333	32.5833	Chorseas-Mündung	66.5	32.6667	Dora	81.6211
66.5	32.6667	Dora	66.4167	32.9167	Karmelos-Berg	129.815
66.4167	32.9167	Karmelos-Berg	66.8333	32.8333	Sykaminon	179.863
66.8333	32.8333	Sykaminon	66.8333	33	Ptolemaïs	83.3333
66.8333	33	Ptolemaïs	67.1667	33.25	Ekdippa	187.37
67.1667	33.25	Ekdippa	67.1667	33.5	Sidon	125
67.1667	33.5	Sidon	67.5	33.5833	Leon-Mündung	145.028
67.5	33.5833	Leon-Mündung	67.5	33.6667	Berytos	41.6667
67.5	33.6667	Berytos	67.6667	33.75	Adonis-Mündung	80.8811
67.6667	33.75	Adonis-Mündung	67.6667	33.9167	Byblos	83.3333
67.6667	33.9167	Byblos	67.5	34.0833	Botrys	108.247
67.5	34.0833	Botrys	67.3333	34.25	Kap Theuprosopon	108.16
67.3333	34.25	Kap Theuprosopon	67.5	34.3333	Tripolis	80.4749
67.5	34.3333	Tripolis	67.6667	34.3333	Orthosia	68.8142
67.6667	34.3333	Orthosia	67.8333	34.3333	Simyra	68.8142
67.8333	34.3333	Simyra	68	34.4167	Eleutheros-Mündung	80.4164
68	34.4167	Eleutheros-Mündung	68.3333	34.5	Balaneai	143.601
68.3333	34.5	Balaneai	68.3333	34.75	Paltos	125
68.3333	34.75	Paltos	68.3333	34.9167	Gabala	83.3333
68.3333	34.9167	Gabala	68.5	35.0833	Laodikeia*	107.723
68.5	35.0833	Laodikeia*	68.3333	35.1667	Herakleia	79.8852
68.3333	35.1667	Herakleia	68.5	35.25	Poseidion	79.8257
68.5	35.25	Poseidion	68.5	35.5	Orontes-Mündung	125
68.5	35.5	Orontes-Mündung	68.5833	35.5833	Seleukeia von Pierien	53.7176
68.5833	35.5833	Seleukeia von Pierien	69	35.8333	Rhosischer Felsen	210.338
69	35.8333	Rhosischer Felsen	69.3333	35.6667	Rhosos	158.872
69.3333	35.6667	Rhosos	69.5	35.8333	Myriandros	107.324
69.5	35.8333	Myriandros	69.5	36.0833	Alexandreia bei Issos	125
69.5	36.0833	Alexandreia bei Issos	69.5	36.3333	Amanos-Pforten	125
69.5	36.3333	Amanos-Pforten	69.3333	36.4167	Issos	78.9809
69.3333	36.4167	Issos	69	36.5	Aigai	140.375
69	36.5	Aigai	68.75	36.5	Serretilis	100.482
68.75	36.5	Serretilis	68.5	36.5	Mallos*	100.482
68.5	36.5	Mallos*	68.25	36.5	Pyramos-Mündung	100.482
68.25	36.5	Pyramos-Mündung	68	36.5	Saros-Mündung	100.482
68	36.5	Saros-Mündung	67.75	36.6667	Kydnos-Mündung	130.458
67.75	36.6667	Kydnos-Mündung	67.5	36.6667	Zephyrion	100.265
67.5	36.6667	Zephyrion	67.25	36.6667	Pompeiopolis*	100.265
67.25	36.6667	Pompeiopolis*	67	36.75	Lamos-Mündung	108.528
67	36.75	Lamos-Mündung	66.75	36.75	Sebaste	100.157
66.75	36.75	Sebaste	66.5	36.8333	Korykos	108.428
66.5	36.8333	Korykos	66.3333	36.6667	Kap Zephyrion	106.784
66.3333	36.6667	Kap Zephyrion	66.3333	36.8333	Kalykadnos-Mündung	83.3333
66.3333	36.8333	Kalykadnos-Mündung	66.1667	36.75	Kap Sarpedon	78.6743
66.1667	36.75	Kap Sarpedon	66	36.8333	Aphrodisias	78.6743
66	36.8333	Aphrodisias	65.75	36.8333	Kelenderis	100.048
65.75	36.8333	Kelenderis	65.5	36.8333	Arsinoe	100.048
65.5	36.8333	Arsinoe	65.3333	36.8333	Orymagdos-Mündung	66.6986
65.3333	36.8333	Orymagdos-Mündung	65.1667	36.8333	Anemurion	66.6986
65.1667	36.8333	Anemurion	64.8333	36.5833	Nephelis	182.969
64.8333	36.5833	Nephelis	64.6667	36.8333	Antiocheia	141.733
64.6667	36.8333	Antiocheia	64.3333	36.75	Selinus*	139.822
64.3333	36.75	Selinus*	64	36.75	Iotape	133.542
64	36.75	Iotape	63.8333	36.75	Syedra	66.7711
63.8333	36.75	Syedra	63.5833	36.6667	Korakesion	108.528
63.5833	36.6667	Korakesion	63.4167	36.6667	Side*	66.8436
63.4167	36.6667	Side*	63	36.9167	Eurymedon-Mündung	208.469
63	36.9167	Eurymedon-Mündung	62.6667	36.8333	Magydos	139.684
62.6667	36.8333	Magydos	62.8333	36.5	Kestros-Mündung	179.571
62.8333	36.5	Kestros-Mündung	62.5	36.5833	Katarraktes-Mündung	140.237
62.5	36.5833	Katarraktes-Mündung	62.25	36.5	Attaleia	108.728
62.25	36.5	Attaleia	62	36.5833	Olbia	108.728
62	36.5833	Olbia	61.8333	36.5	Grenzpunkt (Lykien, Pamphylien)	78.8586
61.8333	36.5	Grenzpunkt (Lykien, Pamphylien)	61.8333	36.4167	Phaselis	41.6667
61.8333	36.4167	Phaselis	61.6667	36.3333	Olympos	78.9809
61.6667	36.3333	Olympos	61.5	36.25	Heiliges Kap	79.042
61.5	36.25	Heiliges Kap	61.1667	36.4167	Aperlai	158.023
61.1667	36.4167	Aperlai	61	36.3333	Limyros-Mündung	78.9809
61	36.3333	Limyros-Mündung	60.75	36.4167	Andriake*	108.928
60.75	36.4167	Andriake*	60.5	36.3333	Antiphellos	108.928
60.5	36.3333	Antiphellos	60.5	36	Patara*	166.667
60.5	36	Patara*	60.3333	36	Xanthos-Mündung	67.4181
60.3333	36	Xanthos-Mündung	60.1667	35.8333	Telmessos	107.234
60.1667	35.8333	Telmessos	60	35.9167	Daidala	79.3455
60	35.9167	Daidala	59.8333	35.9167	Krya	67.4892
59.8333	35.9167	Krya	59.5833	35.8333	Lydai	109.523
59.5833	35.8333	Lydai	59.3333	35.9167	Kalinda	109.523
59.3333	35.9167	Kalinda	59.1667	36	Kaunos	79.285
59.1667	36	Kaunos	58.75	36.0833	Kalbis-Mündung	173.532
58.75	36.0833	Kalbis-Mündung	58.25	36.1667	Phuska	206.187
58.25	36.1667	Phuska	58	36	Phoinix	130.956
58	36	Phoinix	57.6667	35.75	Kressa	184.02
57.6667	35.75	Kressa	57.3333	35.5833	Loryma	158.992
57.3333	35.5833	Loryma	56.6667	35.5	Kap Onugnathos	274.412
56.6667	35.5	Kap Onugnathos	56.25	36	Knidos*	301.806
56.25	36	Knidos*	57	36	Keramos	303.381
57	36	Keramos	57.8333	36.1667	Halikarnassos	346.891
57.8333	36.1667	Halikarnassos	57.3333	36.4167	Kap Skopias	237.125
57.3333	36.4167	Kap Skopias	57.6667	36.4167	Myndos	134.12
57.6667	36.4167	Myndos	57.8333	36.6667	Bargylia	141.801
57.8333	36.6667	Bargylia	57.5	36.8333	Iassos	157.41
57.5	36.8333	Iassos	58	37	Miletos*	216.553
58	37	Miletos*	57.5	37.1667	Herakleia am Latmos	216.149
57.5	37.1667	Herakleia am Latmos	57.8333	37.4167	Pyrrha	182.225
57.8333	37.4167	Pyrrha	57.6667	37.5	Maiander-Mündung	78.1785
57.6667	37.5	Maiander-Mündung	57.1667	37.6667	Kap Trogylion	214.929
57.1667	37.6667	Kap Trogylion	57.6667	37.6667	Ephesos*	197.895
57.6667	37.6667	Ephesos*	57.25	37.8333	Kaystros-Mündung	184.606
57.25	37.8333	Kaystros-Mündung	57.6667	38	Kolophon	184.274
57.6667	38	Kolophon	57.5	38.3333	Lebedos	179.082
57.5	38.3333	Lebedos	57.1667	38.25	Teos	137.287
57.1667	38.25	Teos	56.6667	38.5833	Erythrai	257.188
56.6667	38.5833	Erythrai	57	38.5833	Klazomenai	130.284
57	38.5833	Klazomenai	57.5	38.6667	Kap Argennon	199.707
57.5	38.6667	Kap Argennon	58.4167	38.5833	Smyrna*	360.487
58.4167	38.5833	Smyrna*	58.5	38.75	Hermos-Mündung	89.4586
58.5	38.75	Hermos-Mündung	58.5	38.8333	Phokaia	41.6667
58.5	38.8333	Phokaia	58.3333	39	Kyme	105.586
58.3333	39	Kyme	57.5	39.0833	Kap Hydra	326.29
57.5	39.0833	Kap Hydra	57.25	39.25	Myrina	127.815
57.25	39.25	Myrina	57	39.0833	Elaia	127.815
57	39.0833	Elaia	56.5	39.25	Pitane	210.982
56.5	39.25	Pitane	56.25	39.5	Kap Kaine	157.992
56.25	39.5	Kap Kaine	56.1667	39.75	Kaikos-Mündung	129.054
56.1667	39.75	Kaikos-Mündung	56.5	39.75	Poroselene	128.14
56.5	39.75	Poroselene	56.5	40	Adramytion	125
56.5	40	Adramytion	56.5	40.3333	Antandros	166.667
56.5	40.3333	Antandros	56.25	40.5	Alt-Skepsis	126.497
56.25	40.5	Alt-Skepsis	56.1667	40.3333	Garganon	89.1672
56.1667	40.3333	Garganon	56	40.25	Assos	76.0028
56	40.25	Assos	55.6667	40.4167	Kap Lekton	151.94
55.6667	40.4167	Kap Lekton	55.4167	40.6667	Alexandreia Troas*	156.998
55.4167	40.6667	Alexandreia Troas*	55.1667	41	Kap Sigeion	191.631
55.1667	41	Kap Sigeion	55.25	41	Skamander-Mündung	31.4462
55.25	41	Skamander-Mündung	55.25	41.0833	Dardanon	41.6667
55.25	41.0833	Dardanon	55.3333	41.1667	Simoeis-Mündung	52.1654
55.3333	41.1667	Simoeis-Mündung	55.3333	41.25	Abydos	41.6667
55.3333	41.25	Abydos	55.3333	41.4167	Lampsakos	83.3333
55.3333	41.4167	Lampsakos	55.5	41.5	Grenikos-Mündung	75.0766
55.5	41.5	Grenikos-Mündung	55.75	41.5	Parion	93.6194
55.75	41.5	Parion	56	41.3333	Aisepos-Mündung	125.426
56	41.3333	Aisepos-Mündung	56	41.5	Kyzikos*	83.3333
56	41.5	Kyzikos*	56.3333	41.75	Rhyndakos-Mündung	176.483
56.3333	41.75	Rhyndakos-Mündung	56.5833	41.9167	Daskylion	124.975
56.5833	41.9167	Daskylion	56.9167	42	Apameia*	130.755
56.9167	42	Apameia*	57.3333	42.0833	Prusias	160.233
57.3333	42.0833	Prusias	56.5	42.25	Askanios-Mündung	319.875
56.5	42.25	Askanios-Mündung	56.5	42.4167	Kap Poseidion	83.3333
56.5	42.4167	Kap Poseidion	57	42.5	Olbia	189.09
57	42.5	Olbia	57.3333	42.5	Nikomedeia*	122.879
57.3333	42.5	Nikomedeia*	57	42.6667	Astakos	148.336
57	42.6667	Astakos	56.75	42.75	Trarion	100.861
56.75	42.75	Trarion	56.5	42.75	Kap Akritas	91.7903
56.5	42.75	Kap Akritas	56.0833	43.0833	Chalkedon*	225.955
56.0833	43.0833	Chalkedon*	56	43.3333	Artemis-Heiligtum	128.636
56	43.3333	Artemis-Heiligtum	56.75	43.3333	Kap Bithynia	272.764
56.75	43.3333	Kap Bithynia	57	43.25	Artake	100.071
57	43.25	Artake	57.25	43.25	Psyllis-Mündung	91.0463
57.25	43.25	Psyllis-Mündung	57.6667	43.0833	Kalpa-Mündung	173.302
57.6667	43.0833	Kalpa-Mündung	58	42.75	Sangarios-Mündung	206.581
58	42.75	Sangarios-Mündung	58.6667	42.75	Hypios-Mündung	244.774
58.6667	42.75	Hypios-Mündung	58.8333	43	Elata-Mündung	139.121
58.8333	43	Elata-Mündung	58.75	43.3333	Diospolis	169.415
58.75	43.3333	Diospolis	59	43.5	Herakleia am Pontos*	123.242
59	43.5	Herakleia am Pontos*	59.5	43.5	Psylleion	181.343
59.5	43.5	Psylleion	60	43.5	Tion	181.343
60	43.5	Tion	60.25	43.5	Parthenios-Mündung	90.6718
60.25	43.5	Parthenios-Mündung	60.5	43.5	Amastris	90.6718
60.5	43.5	Amastris	60.5833	43.5833	Kromna	51.462
60.5833	43.5833	Kromna	60.75	43.5833	Kytoros	60.3644
60.75	43.5833	Kytoros	61.1667	43.8333	Klimax	195.715
61.1667	43.8333	Klimax	61.5	44	Teuthrania	146.145
61.5	44	Teuthrania	61.3333	44.4167	Kap Karambis	216.728
61.3333	44.4167	Kap Karambis	61.5	44.3333	Zephyrion	72.6917
61.5	44.3333	Zephyrion	61.75	44.25	Kallistratia	98.7003
61.75	44.25	Kallistratia	62	44	Abunoteichos	153.87
62	44	Abunoteichos	62.5	44	Kimolis	179.835
62.5	44	Kimolis	62.9167	43.9167	Armene	155.648
62.9167	43.9167	Armene	63.3333	43.9167	Stephane	150.073
63.3333	43.9167	Stephane	63.8333	44	Sinope*	184.721
63.8333	44	Sinope*	63.6667	43.6667	Kyptasia	177.176
63.6667	43.6667	Kyptasia	64	43.5	Zaliskos-Mündung	146.696
64	43.5	Zaliskos-Mündung	64.25	43.3333	Gazoron	123.242
64.25	43.3333	Gazoron	64.5	43.1667	Halys-Mündung	123.426
64.5	43.1667	Halys-Mündung	65	43.0833	Amisos*	187.163
65	43.0833	Amisos*	65	43.1667	Grenzpunkt (Galatien, Kappadokien)	41.6667
65	43.1667	Grenzpunkt (Galatien, Kappadokien)	65.6667	43.3333	Ankon der Leukosyrer	256.693
65.6667	43.3333	Ankon der Leukosyrer	66	43	Iris-Mündung	206.288
66	43	Iris-Mündung	66.3333	43.0833	Themiskyra	128.739
66.3333	43.0833	Themiskyra	66.8333	43.3333	Kap des Herakles	220.97
66.8333	43.3333	Kap des Herakles	67	43.25	Thermodon-Mündung	73.5885
67	43.25	Thermodon-Mündung	67.25	43.0833	Polemonion	123.517
67.25	43.0833	Polemonion	67.5	43.25	Kap Iasonion	123.517
67.5	43.25	Kap Iasonion	67.5833	43.0833	Kotyoron	88.7018
67.5833	43.0833	Kotyoron	67.9167	43.25	Hermonassa	147.382
67.9167	43.25	Hermonassa	68.3333	43.3333	Ischopolis	157.26
68.3333	43.3333	Ischopolis	68.9167	43.3333	Kerasus	212.15
68.9167	43.3333	Kerasus	69.3333	43.0833	Pharnakia	196.679
69.3333	43.0833	Pharnakia	70.5	43.3333	Hyssos-Hafen	443.163
70.5	43.3333	Hyssos-Hafen	70.75	43.0833	Trapezus*	154.679
70.75	43.0833	Trapezus*	71	43.4167	Pityus	189.913
71	43.4167	Pityus	71.1667	43.5833	Rizus	102.948
71.1667	43.5833	Rizus	71	43.75	Kap Adienon	102.85
71	43.75	Kap Adienon	71.3333	43.75	Chordyle	120.394
71.3333	43.75	Chordyle	71.6667	43.8333	Morthula	127.321
71.6667	43.8333	Morthula	71.9167	44	Archabis-Mündung	122.688
71.9167	44	Archabis-Mündung	72	44.1667	Xyline	88.5453
72	44.1667	Xyline	72.0833	44.3333	Kissa-Mündung	88.5168
72.0833	44.3333	Kissa-Mündung	72.1667	44.5	Apsorros	88.4883
72.1667	44.5	Apsorros	72.3333	44.6667	Apsorros-Mündung	102.309
72.3333	44.6667	Apsorros-Mündung	72.3333	44.75	Sebastopolis 1	41.6667
72.3333	44.75	Sebastopolis 1	72.5	44.75	Phasis	59.1821
72.5	44.75	Phasis	72.5	45	Phasis-Mündung	125
72.5	45	Phasis-Mündung	72	45.25	Chariustos-Mündung	216.191
72	45.25	Chariustos-Mündung	72	45.5	Aia	125
72	45.5	Aia	71.5	45.6667	Neapolis	193.799
71.5	45.6667	Neapolis	71.5	45.75	Siganeon	41.6667
71.5	45.75	Siganeon	71.5	46.1667	Kyaneos-Mündung	208.333
71.5	46.1667	Kyaneos-Mündung	71	46.5	Hippos-Mündung	239.945
71	46.5	Hippos-Mündung	71.1667	46.75	Dioskurias*	137.479
71.1667	46.75	Dioskurias*	70.5	47	Korax-Mündung	259.897
70.5	47	Korax-Mündung	70	46.8333	Karteron Teichos	190.013
70	46.8333	Karteron Teichos	69.6667	47	Thessyris-Mündung	141.084
69.6667	47	Thessyris-Mündung	69.6667	47.25	Oinantheia*	125
69.6667	47.25	Oinantheia*	69	47.25	Burkas-Mündung	226.266
69	47.25	Burkas-Mündung	68.5	47.25	Ampsalis	169.7
68.5	47.25	Ampsalis	68	47	Kap Toretike	211.09
68	47	Kap Toretike	68	47.5	Lazos	250
68	47.5	Lazos	67.5	47.3333	Kerketischer Golf	188.577
67.5	47.3333	Kerketischer Golf	67	47.5	Achaia	188.577
67	47.5	Achaia	66.6667	47.5	Psychros-Mündung	112.598
66.6667	47.5	Psychros-Mündung	66.3333	47.5	Bata	112.598
66.3333	47.5	Bata	66.5	47.6667	Bata	100.519
66.5	47.6667	Bata	66	48	Sinda	236.52
66	48	Sinda	65.5	47.8333	Sindikos	187.131
65.5	47.8333	Sindikos	65	47.5	Hermonassa*	236.902
65	47.5	Hermonassa*	64.25	47.5	Korokondame	253.345
64.25	47.5	Korokondame	64.5	47.8333	Phanagoria	186.719
64.5	47.8333	Phanagoria	64.5	48.5	Achilles-Heiligtum	333.333
64.5	48.5	Achilles-Heiligtum	66.3333	48.25	Apaturos	621.58
66.3333	48.25	Apaturos	66.5	48.5	Kap Kimmerion	136.708
66.5	48.5	Kap Kimmerion	68	48.3333	Vardanes-Mündung	504.7
68	48.3333	Vardanes-Mündung	69	48.5	Mapeta	342.155
69	48.5	Mapeta	69.5	48.75	Psathis-Mündung	207.198
69.5	48.75	Psathis-Mündung	70	49	Gerusa	206.544
70	49	Gerusa	70	49.3333	Attikites-Mündung	166.667
70	49.3333	Attikites-Mündung	69.6667	49.8333	Tyrambe*	272.353
69.6667	49.8333	Tyrambe*	68	50	Azarabitis	543.005
68	50	Azarabitis	69	50.5	Kleiner Rhombites (Mündung)	405.852
69	50.5	Kleiner Rhombites (Mündung)	68.5	51.3333	Azara	445.478
68.5	51.3333	Azara	68.5	51.6667	Theophanios-Mündung	166.667
68.5	51.6667	Theophanios-Mündung	68.5	52	Grosser Rhombites (Mündung)	166.667
68.5	52	Grosser Rhombites (Mündung)	68	52.5	Patarue	293.129
68	52.5	Patarue	68	53	Marubios-Mündung	250
68	53	Marubios-Mündung	67.5	53.5	Paniardis	291.331
67.5	53.5	Paniardis	67	54.5	Tanaïs (östlicher Mündungsarm)	521.142
67	54.5	Tanaïs (östlicher Mündungsarm)	66.3333	54.1667	Tanaïs (westlicher Mündungsarm)	256.03
66.3333	54.1667	Tanaïs (westlicher Mündungsarm)	65	53.5	Karoia	515.633
65	53.5	Karoia	64.5	53	Poritos-Mündung	291.331
64.5	53	Poritos-Mündung	63.5	52.5	Hygreis	392.543
63.5	52.5	Hygreis	63	51.5	Lykos-Mündung	523.15
63	51.5	Lykos-Mündung	62.6667	51.25	Hain, Halieuma Theu	162.63
62.6667	51.25	Hain, Halieuma Theu	62.5	50.5	Agaros-Mündung	378.669
62.5	50.5	Agaros-Mündung	63	49.6667	Kap Agaron	446.478
63	49.6667	Kap Agaron	62.5	49.75	Kneme	166.952
62.5	49.75	Kneme	61	49.8333	Gerrhos-Mündung	485.958
61	49.8333	Gerrhos-Mündung	60.5	49.6667	Akra	181.759
60.5	49.6667	Akra	60.3333	49.5	Bykes-Mündung	99.3152
60.3333	49.5	Bykes-Mündung	60	49.25	Leianon	165.532
60	49.25	Leianon	60.3333	48.8333	Pasiakes-Mündung	235.241
60.3333	48.8333	Pasiakes-Mündung	60.5	48.6667	Neue Festung	99.817
60.5	48.6667	Neue Festung	60.5	48.5	Endpunkt beim See Byke	83.3333
60.5	48.5	Endpunkt beim See Byke	62	48.5	Herakleion	496.957
62	48.5	Herakleion	63	48.75	Zenons Chersonesos	353.338
63	48.75	Zenons Chersonesos	63.5	48.5	Parthenion	207.198
63.5	48.5	Parthenion	64	48.5	Kap Myrmekion	165.655
64	48.5	Kap Myrmekion	64	47.9167	Pantikapaia*	291.667
64	47.9167	Pantikapaia*	63.5	47.6667	Tyriktake	209.366
63.5	47.6667	Tyriktake	63.75	47.5	Nymphaion	118.547
63.75	47.5	Nymphaion	63.3333	47.3333	Theodosia*	163.76
63.3333	47.3333	Theodosia*	63.5	47.1667	Istrianos-Mündung	100.719
63.5	47.1667	Istrianos-Mündung	63	47	Kap Korax	189.535
63	47	Kap Korax	62.5	47	Lagyra	170.499
62.5	47	Lagyra	62	46.8333	Charax	190.013
62	46.8333	Charax	62	46.6667	Kap Kriu Metopon	83.3333
62	46.6667	Kap Kriu Metopon	61.75	47.25	Argoda	303.888
61.75	47.25	Argoda	61.25	47.0833	Ktenus	189.296
61.25	47.0833	Ktenus	61	47	Chersonesos	94.8277
61	47	Chersonesos	60.6667	47	Kap Parthenion	113.666
60.6667	47	Kap Parthenion	61	47.25	Symbolon	168.773
61	47.25	Symbolon	60.75	47.3333	Dandake	94.4686
60.75	47.3333	Dandake	60.75	47.6667	Eupatoria	166.667
60.75	47.6667	Eupatoria	60.3333	48.3333	Endpunkt bei der Bucht von Karkina	361.307
60.3333	48.3333	Endpunkt bei der Bucht von Karkina	59.6667	48.5	Karkinites-Mündung	236.409
59.6667	48.5	Karkinites-Mündung	59.3333	48.5	Tamyrake*	110.437
59.3333	48.5	Tamyrake*	59.5	48	Schöner Hafen	256.084
59.5	48	Schöner Hafen	59.75	47.8333	Kephalonesos	118.165
59.75	47.8333	Kephalonesos	59.75	47.5	Kap Misaris (östliches Kap des Dromos des Achill)	166.667
59.75	47.5	Kap Misaris (östliches Kap des Dromos des Achill)	57.8333	47.5	Heiliges Kap (westliches Kap des Dromos des Achill)	647.424
57.8333	47.5	Heiliges Kap (westliches Kap des Dromos des Achill)	59	47.6667	Landenge des Dromos des Achill	402.192
59	47.6667	Landenge des Dromos des Achill	58.5	47.75	Hekate-Hain	173.309
58.5	47.75	Hekate-Hain	58	48.5	Hypanis-Mündung	410.452
58	48.5	Hypanis-Mündung	57.5	48.5	Borysthenes-Mündung	165.655
57.5	48.5	Borysthenes-Mündung	57	48	Axiakes-Mündung	300.352
57	48	Axiakes-Mündung	56	47.6667	Physke	374.743
56	47.6667	Physke	56.3333	47.6667	Tyras-Mündung	112.24
56.3333	47.6667	Tyras-Mündung	56.25	47.5	Dorf des Hermonax	87.945
56.25	47.5	Dorf des Hermonax	56	47.25	Harpis	150.965
56	47.25	Harpis	56.25	47	Psilon (Mündung)	151.19
56.25	47	Psilon (Mündung)	56.3333	46.8333	Nördliche Mündung	88.0594
56.3333	46.8333	Nördliche Mündung	56.25	46.667	Pseudostomon	87.9304
56.25	46.667	Pseudostomon	56.25	46.5	Schöne Mündung	83.5
56.25	46.5	Schöne Mündung	56.5	46.3333	Narakion-Mündung	119.878
56.5	46.3333	Narakion-Mündung	56	46.25	Heilige Mündung	177.701
56	46.25	Heilige Mündung	56.3333	46	Kap Pteron	170.201
56.3333	46	Kap Pteron	55.6667	46	Histria	231.552
55.6667	46	Histria	55	45.8333	Tomi	246.419
55	45.8333	Tomi	54.6667	45.5	Callatis	203.331
54.6667	45.5	Callatis	54.3333	45.25	Dionysopolis	171.266
54.3333	45.25	Dionysopolis	55	45.1667	Kap Tiristis	238.511
55	45.1667	Kap Tiristis	54.8333	45	Odessus*	102.013
54.8333	45	Odessus*	54.5	44.75	Panysus-Mündung	171.972
54.5	44.75	Panysus-Mündung	55	44.6667	Endpunkt bei Thrakien	182.494
55	44.6667	Endpunkt bei Thrakien	54.75	44.5	Anchialos	121.945
54.75	44.5	Anchialos	54.8333	44.3333	Apollonia* Pontike	88.4883
54.8333	44.3333	Apollonia* Pontike	55	44.5	Tonzu-Mündung	102.408
55	44.5	Tonzu-Mündung	55.1667	44	Perontikon	257.027
55.1667	44	Perontikon	55.6667	44	Kap Thynias	179.835
55.6667	44	Kap Thynias	55.3333	43.6667	Strand von Halmydessos	205.504
55.3333	43.6667	Strand von Halmydessos	55.5833	43.5	Kap Philia	123.057
55.5833	43.5	Kap Philia	55.5	43.3333	Phinopolis	88.6592
55.5	43.3333	Phinopolis	56	43.0833	Byzanz*	220.97
56	43.0833	Byzanz*	56.0833	43.0833	Bathynias-Mündung	30.4317
55.5	43	Bathynias-Mündung	55.5	42.9167	Athyras-Mündung	41.6667
55.5	42.9167	Athyras-Mündung	55	42.5	Selymbria	277.758
55	42.5	Selymbria	54.8333	42.3333	Perinthos oder Herakleia*	103.583
54.8333	42.3333	Perinthos oder Herakleia*	54.8333	42.1667	Arzos-Mündung	83.3333
54.8333	42.1667	Arzos-Mündung	54.6667	42	Bisanthe	103.776
54.6667	42	Bisanthe	54.8333	41.8333	Lange Mauer	103.873
54.8333	41.8333	Lange Mauer	54.5	41.75	Paktye	131.062
54.5	41.75	Paktye	54.3333	41.5	Grenzpunkt der Thrakischen Chersones an der Propontis	139.661
54.3333	41.5	Grenzpunkt der Thrakischen Chersones an der Propontis	55	41.5	Kallipolis	249.651
55	41.5	Kallipolis	54.9167	41.25	Sestos*	128.851
54.9167	41.25	Sestos*	54.9167	41	Koila	125
54.9167	41	Koila	54.6667	40.75	Kap gleich daneben	156.711
54.6667	40.75	Kap gleich daneben	54.5	40.75	Elaius*	63.1304
54.5	40.75	Elaius*	54.5	40.6667	Mastusia	41.6667
54.5	40.6667	Mastusia	54	41.0833	Kardiapolis	281.312
54	41.0833	Kardiapolis	53.8333	41.5	Grenzpunkt der Thrakischen Chersones am Schwarzen Golf	217.539
53.8333	41.5	Grenzpunkt der Thrakischen Chersones am Schwarzen Golf	53.5	41.5	Mündung des Schwarzen Flusses	124.826
53.5	41.5	Mündung des Schwarzen Flusses	53.25	41.3333	Breites Kap	125.426
53.25	41.3333	Breites Kap	53.1667	41.5	Ainos*	88.9988
53.1667	41.5	Ainos*	53	41.5	Hebros-Mündung	62.413
53	41.5	Hebros-Mündung	52.6667	41.6667	Maroneia	149.953
52.6667	41.6667	Maroneia	52.1667	41.75	Abdera	191.23
52.1667	41.75	Abdera	51.75	41.75	Nessos-Mündung	155.428
51.75	41.75	Nessos-Mündung	51.25	41.6667	Neapolis	191.23
51.25	41.6667	Neapolis	50.8333	41.5	Oisyme	176.714
50.8333	41.5	Oisyme	50.25	41.4167	Strymon-Mündung	222.521
50.25	41.4167	Strymon-Mündung	50.1667	41.25	Arethusa	89.0129
50.1667	41.25	Arethusa	50.3333	41.1667	Stageira	75.2765
50.3333	41.1667	Stageira	50.6667	41	Panormos	150.752
50.6667	41	Panormos	51	41.1667	Athos	150.752
51	41.1667	Athos	51.25	41.25	Athos	102.857
51.25	41.25	Athos	51.1667	40.75	Kap Nymphaion	251.97
51.1667	40.75	Kap Nymphaion	50.9167	40.9167	Stratonike	126.052
50.9167	40.9167	Stratonike	50.6667	40.8333	Akanthos	103.294
50.6667	40.8333	Akanthos	50.5	40.6667	Singos	104.546
50.5	40.6667	Singos	51.25	40.5	Kap Ampelos	296.738
51.25	40.5	Kap Ampelos	51.25	40.3333	Kap Derris	83.3333
51.25	40.3333	Kap Derris	50.75	40.4167	Torone	194.959
50.75	40.4167	Torone	50.6667	40.3333	Toronischer Golf (innerster Punkt)	52.3803
50.6667	40.3333	Toronischer Golf (innerster Punkt)	51	40.0833	Pallene (Landenge der Halbinsel)	178.399
51	40.0833	Pallene (Landenge der Halbinsel)	51.25	39.9167	Kap Kanastraion	126.939
51.25	39.9167	Kap Kanastraion	51.0833	40	Kasandreia*	76.2643
51.0833	40	Kasandreia*	50.6667	40	Chabrios-Mündung	159.592
50.6667	40	Chabrios-Mündung	50.5	40	Kap Gigonis	63.837
50.5	40	Kap Gigonis	49.8333	40.3333	Thessalonike*	304.403
49.8333	40.3333	Thessalonike*	49.75	40.25	Echedoros-Mündung	52.4041
49.75	40.25	Echedoros-Mündung	49.6667	40.1667	Axios-Mündung	52.4279
49.6667	40.1667	Axios-Mündung	49.5	40	Lydias-Mündung	104.927
49.5	40	Lydias-Mündung	49.6667	39.75	Pydna	140.41
49.6667	39.75	Pydna	49.8333	39.6667	Haliakmon-Mündung	76.4595
49.8333	39.6667	Haliakmon-Mündung	50	39.5833	Dion	76.5244
50	39.5833	Dion	50.1667	39.5	Baphyras-Mündung	76.5892
50.1667	39.5	Baphyras-Mündung	50.5	39.4167	Peneios-Mündung	135.259
50.5	39.4167	Peneios-Mündung	51.6667	39.5	Kap Magnesia	452.304
51.6667	39.5	Kap Magnesia	51.8333	39.25	Kap Sepias	140.622
51.8333	39.25	Kap Sepias	51.6667	39.25	Aiantion	64.5327
51.6667	39.25	Aiantion	51.5	39.25	Iolkos	64.5327
51.5	39.25	Iolkos	50.8333	38.9167	Pagasai	307.774
50.8333	38.9167	Pagasai	50.5	38.9167	Demetrias	129.677
50.5	38.9167	Demetrias	51	38.8333	Eretriai	199.039
51	38.8333	Eretriai	51.5	38.8333	Kap Poseidion	194.743
51.5	38.8333	Kap Poseidion	51.3333	38.8333	Larissa Kremaste	64.9144
51.3333	38.8333	Larissa Kremaste	51.1667	38.75	Echinos	77.1682
51.1667	38.75	Echinos	51.3333	38.5833	Spercheia	105.726
51.3333	38.5833	Spercheia	51.1667	38.5833	Theben in der Phthiotis	65.1418
51.1667	38.5833	Theben in der Phthiotis	51	38.5	Spercheios-Mündung	77.3595
51	38.5	Spercheios-Mündung	51	38.4167	Malischer Golf	41.6667
51	38.4167	Malischer Golf	51.25	38.4167	Skarpheia	97.9391
51.25	38.4167	Skarpheia	51.5	38.4167	Boagrios-Mündung	97.9391
51.5	38.4167	Boagrios-Mündung	52	38.3333	Kynos	200.371
52	38.3333	Kynos	52.1667	38.4167	Knemides	77.4865
52.1667	38.4167	Knemides	52.25	38.1667	Oitäischer Golf (innerster Punkt)	129.207
52.25	38.1667	Oitäischer Golf (innerster Punkt)	52.6667	38.1667	Phokai	163.795
52.6667	38.1667	Phokai	53	38.1667	Anthedon	131.036
53	38.1667	Anthedon	53	38	Salganeus	83.3333
53	38	Salganeus	53.1667	37.8333	Ismenos-Mündung	106.144
53.1667	37.8333	Ismenos-Mündung	53.25	37.75	Aulis	53.1064
53.25	37.75	Aulis	53.3333	37.6667	Oropos	53.1294
53.3333	37.6667	Oropos	53.5	37.5	Chersonesos	106.328
53.5	37.5	Chersonesos	53.5	37.4167	Asopos-Mündung	41.6667
53.5	37.4167	Asopos-Mündung	53.8333	37.3333	Kap Kynosura	138.846
53.8333	37.3333	Kap Kynosura	53.6667	37.0833	Artemis-Heiligtum	141.527
53.6667	37.0833	Artemis-Heiligtum	53.6667	37	Panormos	41.6667
53.6667	37	Panormos	53.5833	36.75	Kap Sunion	129.368
53.5833	36.75	Kap Sunion	53.5	36.8333	Hyphormos	53.3807
53.5	36.8333	Hyphormos	53.25	37	Munychia	130.124
53.25	37	Munychia	52.9167	37.0833	Ilissos-Mündung	139.405
52.9167	37.0833	Ilissos-Mündung	52.75	37.1667	Peiraieus	78.4272
52.75	37.1667	Peiraieus	52.3333	37.25	Eleusis	171.077
52.3333	37.25	Eleusis	52	37.3333	Megara	138.986
52	37.3333	Megara	51.3333	37	Schoinus	313.584
51.3333	37	Schoinus	51.4167	36.9167	Kenchreai	53.3352
51.4167	36.9167	Kenchreai	51.4167	36.75	Bukephalon	83.3333
51.4167	36.75	Bukephalon	51.5	36.5833	Hafen der Athener	89.7856
51.5	36.5833	Hafen der Athener	51.75	36.5	Kap Speiraion	108.728
51.75	36.5	Kap Speiraion	51.8333	36.4167	Epidauros	53.4712
51.8333	36.4167	Epidauros	52.1667	36.3333	Methana	140.512
52.1667	36.3333	Methana	52.3333	36.0833	Troizen	141.937
52.3333	36.0833	Troizen	52.5	36.0833	Kap Skyllaion	67.3468
52.5	36.0833	Kap Skyllaion	52	36	Hermione	206.397
52	36	Hermione	51.75	35.9167	Phlius	109.424
51.75	35.9167	Phlius	51.5833	36.0833	Nauplia	107.19
51.5833	36.0833	Nauplia	51.5	35.8333	Inachos-Mündung	129.47
51.5	35.8333	Inachos-Mündung	51.5	35.75	Astron	41.6667
51.5	35.75	Astron	51.3333	35.8333	Prasia	79.4059
51.3333	35.8333	Prasia	51.1667	35.75	Kyphanta	79.4059
51.1667	35.75	Kyphanta	51	35.6667	Zarex	79.4662
51	35.6667	Zarex	51.0833	35.5	Epidauros Limera	89.9595
51.0833	35.5	Epidauros Limera	51.1667	35.25	Hafen des Zeus Soter	129.535
51.1667	35.25	Hafen des Zeus Soter	51.1667	35.1667	Minoa	41.6667
51.1667	35.1667	Minoa	51.3333	35	Kap Malea	107.679
51.3333	35	Kap Malea	51.0833	35.0833	Boai	110.499
51.0833	35.0833	Boai	51	35	Kap Onugnathos	53.8505
51	35	Kap Onugnathos	50.8333	35.0833	Asopos	79.9447
50.8333	35.0833	Asopos	50.75	35.1667	Biandyna	53.8284
50.75	35.1667	Biandyna	50.5833	35.1667	Akreia	68.1233
50.5833	35.1667	Akreia	50.5	35.1667	Eurotas-Mündung	34.0617
50.5	35.1667	Eurotas-Mündung	50.4167	35.1667	Trinassos	34.0617
50.4167	35.1667	Trinassos	50.3333	35.0833	Gythion	53.8284
50.3333	35.0833	Gythion	50.25	35	Las	53.8505
50.25	35	Las	50.1667	34.9167	Teuthrone	53.8725
50.1667	34.9167	Teuthrone	50.0833	34.8333	Kaine	53.8945
50.0833	34.8333	Kaine	50	34.75	Tainarion	53.9164
50	34.75	Tainarion	50	34.3333	Kap Tainaria	208.333
50	34.3333	Kap Tainaria	49.8333	34.6667	Leuktron	180.262
49.8333	34.6667	Leuktron	49.75	35.1667	Abea	252.324
49.75	35.1667	Abea	49.5	35.25	Pherai	110.305
49.5	35.25	Pherai	49.3333	35.25	Pamisos-Mündung	68.0535
49.3333	35.25	Pamisos-Mündung	49.25	35.25	Messene*	34.0267
49.25	35.25	Messene*	49	35.0833	Korone	131.857
49	35.0833	Korone	48.8333	35	Asine	79.9447
48.8333	35	Asine	48.5	35	Kap Akritas	136.525
48.5	35	Kap Akritas	48.75	35.25	Kolone	161.485
48.75	35.25	Kolone	48.5833	35.3333	Methone	79.766
48.5833	35.3333	Methone	48.5	35.4167	Kap Koryphasion	53.762
48.5	35.4167	Kap Koryphasion	48.5833	35.5	Pylos	53.7398
48.5833	35.5	Pylos	48.5	35.5833	Selas-Mündung	53.7176
48.5	35.5833	Selas-Mündung	48.4167	35.6667	Kap Kyparission	53.6954
48.4167	35.6667	Kap Kyparission	48.5833	35.75	Kyparissia	79.4662
48.5833	35.75	Kyparissia	48.3333	35.9167	Alpheios-Mündung	131.203
48.3333	35.9167	Alpheios-Mündung	48.0833	36	Kap Ichthys	109.424
48.0833	36	Kap Ichthys	48.3333	36.25	Chelonischer Golf	160.684
48.3333	36.25	Chelonischer Golf	48	36.3333	Kap Chelonitis	140.649
48	36.3333	Kap Chelonitis	48.3333	36.5	Peneios-Mündung	157.901
48.3333	36.5	Peneios-Mündung	48.5	36.5	Kyllene	66.9881
48.5	36.5	Kyllene	48.5	36.75	Kap Araxos	125
48.5	36.75	Kap Araxos	48.6667	36.6667	Dyme	78.7359
48.6667	36.6667	Dyme	48.8333	36.75	Olenos	78.7359
48.8333	36.75	Olenos	49	36.8333	Patrai	78.6743
49	36.8333	Patrai	49.25	37	Poseidon-Heiligtum	130.124
49.25	37	Poseidon-Heiligtum	49.3333	37.1667	Kap Drepanon	89.7181
49.3333	37.1667	Kap Drepanon	49.5	36.9167	Erineos	141.596
49.5	36.9167	Erineos	49.75	36.9167	Aigion	99.9387
49.75	36.9167	Aigion	50.25	36.9167	Aigeira	199.877
50.25	36.9167	Aigeira	50.6667	37	Sys-Mündung	171.609
50.6667	37	Sys-Mündung	51.0833	37.0833	Asopos-Mündung	171.432
51.0833	37.0833	Asopos-Mündung	51.25	37	Lechaion	78.4892
51.25	37	Lechaion	51.25	37.25	Hera-Heiligtum in der Korinthia	125
51.25	37.25	Hera-Heiligtum in der Korinthia	51.4167	37.4167	Pegai	106.465
51.4167	37.4167	Pegai	51.25	37.5	Kreusa	78.1785
51.25	37.5	Kreusa	51	37.5833	Siphai	107.516
51	37.5833	Siphai	50.5	37.5	Antikyra	202.559
50.5	37.5	Antikyra	50.25	37.5	Krisa	99.1691
50.25	37.5	Krisa	50	37.5	Kirrha	99.1691
50	37.5	Kirrha	49.9167	37.8333	Chaleos	169.899
49.9167	37.8333	Chaleos	49.75	37.75	Euanthia	77.9283
49.75	37.75	Euanthia	49.5	37.5833	Naupaktos	129.364
49.5	37.5833	Naupaktos	49.3333	37.4167	Kap Antirrhion	106.374
49.3333	37.4167	Kap Antirrhion	49	37.5	Euenos-Mündung	138.705
49	37.5	Euenos-Mündung	48.5	37.4167	einer Kap	202.776
48.5	37.4167	einer Kap	48.4167	37.5	Acheloos-Mündung	53.1983
48.4167	37.5	Acheloos-Mündung	48.3333	37.4167	Alyzeia	53.1983
48.3333	37.4167	Alyzeia	48.1667	37.3333	Kap Leukas	78.2409
48.1667	37.3333	Kap Leukas	48.3333	37.75	Aktion	218.561
48.3333	37.75	Aktion	48	38.3333	Ambrakia*	319.841
48	38.3333	Ambrakia*	47.8333	38.25	Arachthos-Mündung	77.5499
47.8333	38.25	Arachthos-Mündung	47.5833	37.9167	Nikopolis* am Ambrakischen Golf	193.541
47.5833	37.9167	Nikopolis* am Ambrakischen Golf	47.25	37.8333	Hafen von Elaia	137.999
47.25	37.8333	Hafen von Elaia	47.1667	38	Acheron-Mündung	89.5821
47.1667	38	Acheron-Mündung	46.9167	38	Sybota	98.5013
46.9167	38	Sybota	46.75	38	Torone	65.6676
46.75	38	Torone	46.5	38.0833	Thyamis-Mündung	106.9
46.5	38.0833	Thyamis-Mündung	46.1667	38	Kap Thyamis	137.715
46.1667	38	Kap Thyamis	46.1667	38.1667	Schlammhafen	83.3333
46.1667	38.1667	Schlammhafen	45.8333	38	Buthroton	155.416
45.8333	38	Buthroton	45.75	37.9167	Kap Poseidion	53.0603
45.75	37.9167	Kap Poseidion	45.5	38.4167	Kassiope	268.623
45.5	38.4167	Kassiope	45.3333	38.5833	Onchesmos	105.819
45.3333	38.5833	Onchesmos	45	38.6667	Panormos	136.712
45	38.6667	Panormos	44.4167	39.1667	Akrokeraunische Berge (Spitze)	337.636
44.4167	39.1667	Akrokeraunische Berge (Spitze)	45	39.1667	Orikon	226.132
45	39.1667	Orikon	45	39.3333	Kelydnos-Mündung	83.3333
45	39.3333	Kelydnos-Mündung	44.9167	39.5	Amantia	89.3343
44.9167	39.5	Amantia	45	39.75	Bullis	129.054
45	39.75	Bullis	44.8333	39.9167	Aulon	105.069
44.8333	39.9167	Aulon	45	40	Aoos-Mündung	76.2643
45	40	Aoos-Mündung	45.0833	40.1667	Apollonia	89.223
45.0833	40.1667	Apollonia	45.0833	40.5	Apsos-Mündung	166.667
45.0833	40.5	Apsos-Mündung	45	40.667	Panyasos-Mündung	89.295
45	40.667	Panyasos-Mündung	45	40.8333	Dyrrhachion*	83.1667
45	40.8333	Dyrrhachion*	45	41	Illyricum (südlicher Endpunkt an der Adria)	83.3333
45	41	Illyricum (südlicher Endpunkt an der Adria)	45	41.1667	Lissus	83.3333
45	41.1667	Lissus	45	41.3333	Drilon-Mündung	83.3333
45	41.3333	Drilon-Mündung	45	41.5	Ulcinium	83.3333
45	41.5	Ulcinium	45	41.75	Butua	125
45	41.75	Butua	45	42	Golf von Rhizon	125
45	42	Golf von Rhizon	44.75	42	Acruvium	92.8931
44.75	42	Acruvium	44.6667	42.25	Risinum	128.763
44.6667	42.25	Risinum	44.6667	42.3333	Epidaurum	41.6667
44.6667	42.3333	Epidaurum	44.5	42.3333	Naro-Mündung	61.6033
44.5	42.3333	Naro-Mündung	44	42.5	Oneum	202.505
44	42.5	Oneum	44	42.75	Pituntium	125
44	42.75	Pituntium	43.6667	43	Epetium	174.766
43.6667	43	Epetium	43.3333	43.1667	Salonae*	147.519
43.3333	43.1667	Salonae*	43	43.3333	Sicun	147.245
43	43.3333	Sicun	42.6667	43.5	Scardona	146.971
42.6667	43.5	Scardona	42.3333	43.1667	Titus-Mündung	206.092
42.3333	43.1667	Titus-Mündung	42	43.75	Iader*	315.761
42	43.75	Iader*	41.5	44	Aenona	219.321
41.5	44	Aenona	41.1667	44	Corinium	119.89
41.1667	44	Corinium	40.75	44.1667	Argyruntum	171.289
40.75	44.1667	Argyruntum	40.3333	44.5	Vegium	223.571
40.3333	44.5	Vegium	40	44.5	Ortopla	118.875
40	44.5	Ortopla	39.333	44.5	Tidavius-Mündung	237.868
39.333	44.5	Tidavius-Mündung	39.25	44.6667	Lopsica	88.42
39.25	44.6667	Lopsica	39	44.6667	Senia	88.901
39	44.6667	Senia	38.5	44.75	Volcera	182.494
38.5	44.75	Volcera	38	44.75	Oineus-Mündung	177.546
38	44.75	Oineus-Mündung	37.6667	44.5833	Tarsatica	144.896
37.6667	44.5833	Tarsatica	37	44.75	Flanona	251.289
37	44.75	Flanona	36.8333	45	Alvona	138.247
36.8333	45	Alvona	36.5	44.8333	Illyricum (westlicher Endpunkt an der Adria)	144.477
36.5	44.8333	Illyricum (westlicher Endpunkt an der Adria)	36.25	44.9167	Nesactum (Ende Italiens)	97.8912
36.25	44.9167	Nesactum (Ende Italiens)	36	44.6667	Pola	153.278
36	44.6667	Pola	35.3333	44.9167	Parentium	267.552
35.3333	44.9167	Parentium	35	44.9167	Formio-Mündung	118.022
35	44.9167	Formio-Mündung	34.5	44.9167	Tergeste	177.033
34.5	44.9167	Tergeste	34	44.8333	Natiso-Mündung	181.995
34	44.8333	Natiso-Mündung	33	44.8333	Tiliaventum-Mündung	354.578
33	44.8333	Tiliaventum-Mündung	34	44.5	Atrianus-Mündung	392.72
34	44.5	Atrianus-Mündung	34.75	44	Padus-Mündung	366.948
34.75	44	Padus-Mündung	34.6667	44	Ravenna*	29.9725
34.6667	44	Ravenna*	34.9167	43.8333	Rubico-Mündung	122.688
34.9167	43.8333	Rubico-Mündung	35	43.8333	Ariminum	30.0566
35	43.8333	Ariminum	35.3333	43.75	Pisaurum	127.321
35.3333	43.75	Pisaurum	35.6667	43.75	Fanum Fortunae	120.394
35.6667	43.75	Fanum Fortunae	36	43.6667	Sena Gallica	127.479
36	43.6667	Sena Gallica	36.3333	43.6667	Aesis-Mündung	120.561
36.3333	43.6667	Aesis-Mündung	36.5	43.6667	Ancona*	60.2807
36.5	43.6667	Ancona*	36.8333	43.3333	Numana	205.897
36.8333	43.3333	Numana	37.25	43.1667	Potentia	173.12
37.25	43.1667	Potentia	37.6667	43.3333	Truentus-Mündung	173.12
37.6667	43.3333	Truentus-Mündung	38	43.5	Cupra Maritima	146.971
38	43.5	Cupra Maritima	38.5	43	Castrum	309.284
38.5	43	Castrum	39.33	42.75	Matrinus-Mündung	328.813
39.33	42.75	Matrinus-Mündung	40.5	42.5	Aternus-Mündung	448.222
40.5	42.5	Aternus-Mündung	40.75	42.25	Ortona	155.41
40.75	42.25	Ortona	41.3333	42	Sagrus-Mündung	249.841
41.3333	42	Sagrus-Mündung	41.1667	41.75	Histonium	139.554
41.1667	41.75	Histonium	41.6667	41.6667	Buca	191.23
41.6667	41.6667	Buca	42	41.5	Tifernus-Mündung	149.953
42	41.5	Tifernus-Mündung	42.5	41.25	Uria	225.429
42.5	41.25	Uria	42.3333	41	Garganus	139.876
42.3333	41	Garganus	42.8333	40.75	Apeneste	226.625
42.8333	40.75	Apeneste	42.8333	40.5	Sipontum	125
42.8333	40.5	Sipontum	42.8333	40.3333	Salpia	83.3333
42.8333	40.3333	Salpia	42.5	40.25	Aufidus-Mündung	133.781
42.5	40.25	Aufidus-Mündung	42.5	40.0833	Barium	83.3333
42.5	40.0833	Barium	42.5	39.8333	Egnatia	125
42.5	39.8333	Egnatia	42.5	39.6667	Brundisium*	83.3333
42.5	39.6667	Brundisium*	42.6667	39.5	Lupiae	105.211
42.6667	39.5	Lupiae	43	39.0833	Hydruntum	245.032
43	39.0833	Hydruntum	42.3333	38.75	Kap Iapygia	308.287
42.3333	38.75	Kap Iapygia	42.1932	39.2595	technical point	260.52
42.1932	39.2595	technical point	42.1667	40	Tarentum	370.378
42.1667	40	Tarentum	41.9167	39.9167	Metapontum	104.482
41.9167	39.9167	Metapontum	41.9167	39.5	Thurii	208.333
41.9167	39.5	Thurii	41.5	39.1667	Croto	231.827
41.5	39.1667	Croto	41.5	38.75	Kap Lacinium	208.333
41.5	38.75	Kap Lacinium	40.75	38.75	Golf von Scolacium (innerster Punkt)	292.456
40.75	38.75	Golf von Scolacium (innerster Punkt)	40.9167	38.5833	Locanus-Mündung	105.726
40.9167	38.5833	Locanus-Mündung	40.8333	38.4167	Locri	89.4861
40.8333	38.4167	Locri	40.75	38.4167	Kap Zephyrion	32.6464
40.75	38.4167	Kap Zephyrion	39.8333	38	Kap Leukopetra	416.057
39.8333	38	Kap Leukopetra	39.8333	38.25	Regium Iulium	125
39.8333	38.25	Regium Iulium	39.6667	38.3333	Kap Skylla	77.5499
39.6667	38.3333	Kap Skylla	40.3333	38.75	Taurische Klippe	333.73
40.3333	38.75	Taurische Klippe	40	39	Tempsa	180.169
40	39	Tempsa	40	39.25	Laus-Mündung	125
40	39.25	Laus-Mündung	40	39.5	Buxentum	125
40	39.5	Buxentum	40.3333	39.75	Velia	179.177
40.3333	39.75	Velia	40.1667	40	Paestum	140.41
40.1667	40	Paestum	40.0833	40.25	Silerus-Mündung	128.996
40.0833	40.25	Silerus-Mündung	40	40.3333	Salernum	52.4041
40	40.3333	Salernum	40.1667	40.6667	Surrentum	178.306
40.1667	40.6667	Surrentum	40.0833	40.9167	Sarnus-Mündung	128.919
40.0833	40.9167	Sarnus-Mündung	40	40.5	Neapolis*	210.714
40	40.5	Neapolis*	39.8333	41	Puteoli	257.848
39.8333	41	Puteoli	39.5	41.5	Liternum	279.645
39.5	41.5	Liternum	39.3333	41.5	Cumae	62.413
39.3333	41.5	Cumae	38.75	41.0833	Volturnum	302.369
38.75	41.0833	Volturnum	38.5	41.33	Sinuessa	155.097
38.5	41.33	Sinuessa	38.3333	41.25	Liris-Mündung	74.3009
38.3333	41.25	Liris-Mündung	38.1667	41.25	Formiae	62.6533
38.1667	41.25	Formiae	37.75	41.25	Tarracinae*	156.633
37.75	41.25	Tarracinae*	37.5	41.1667	Kap Kirke	102.857
37.5	41.1667	Kap Kirke	37.1667	41.3333	Clostra	150.486
37.1667	41.3333	Clostra	36.8333	41.3333	Antium	125.147
36.8333	41.3333	Antium	36.5	41.5	Ostia	150.22
36.5	41.5	Ostia	36.25	41.6667	Alsium	125.246
36.25	41.6667	Alsium	36	41.6667	Pyrgi	93.3781
36	41.6667	Pyrgi	35.6667	41.6667	Castrum Novum	124.504
35.6667	41.6667	Castrum Novum	35.3333	41.75	Graviscae	131.215
35.3333	41.75	Graviscae	35	41.9167	Cosa	149.551
35	41.9167	Cosa	34.5	42	Osa-Mündung	190.52
34.5	42	Osa-Mündung	34.25	42	Kap Telamo	92.8931
34.25	42	Kap Telamo	34	42.5	Trajans-Hafen	266.573
34	42.5	Trajans-Hafen	33.5	42	Kap Populonium	311.037
33.5	42	Kap Populonium	33.5	42.5	Populonium	250
33.5	42.5	Populonium	33.3333	42.6667	Arnus-Mündung	103.485
33.3333	42.6667	Arnus-Mündung	32.6667	42.75	Hercules-Heiligtum	248.457
32.6667	42.75	Hercules-Heiligtum	32	42.6667	Kap Luna	248.457
32	42.6667	Kap Luna	31.75	42.75	Luna	100.861
31.75	42.75	Luna	30.75	42.75	Macra-Mündung	367.159
30.75	42.75	Macra-Mündung	30.5833	42.9167	Tigullia	103.339
30.5833	42.9167	Tigullia	30.5	42.8333	Entella-Mündung	51.6575
30.5	42.8333	Entella-Mündung	30	42.8333	Genua	183.333
30	42.8333	Genua	29.5	42.75	Albingaunum	188.129
29.5	42.75	Albingaunum	29.1667	42.75	Albintimilium	122.387
29.1667	42.75	Albintimilium	28.6667	42.6667	Monoeci Portus	188.37
28.6667	42.6667	Monoeci Portus	28.5	42.5	Tropaea Augusti	103.485
28.5	42.5	Tropaea Augusti	28.25	42.75	Hercules-Hafen	155.191
28.25	42.75	Hercules-Hafen	28	43.4167	Nicaea*	345.609
28	43.4167	Nicaea*	27.5	43	Varus-Mündung	276.777
27.5	43	Varus-Mündung	27	43	Antipolis	182.838
27	43	Antipolis	26.5	42.8333	Forum Iulii	201.159
26.5	42.8333	Forum Iulii	25.6667	42.75	Argenteus-Mündung	308.587
25.6667	42.75	Argenteus-Mündung	25.5	42.75	Olbia	61.1935
25.5	42.75	Olbia	25	42.5	Kap Citharistes	222.402
25	42.5	Kap Citharistes	24.8333	42.8333	Tauroentium	177.574
24.8333	42.8333	Tauroentium	24.5	43.0833	Massilia*	174.65
24.5	43.0833	Massilia*	23.75	43	Caenus-Mündung	277.22
23.75	43	Caenus-Mündung	23.1667	43	Maritima	213.311
23.1667	43	Maritima	23	42.3333	Rhodanus-Mündung (östliche)	338.918
23	42.3333	Rhodanus-Mündung (östliche)	22.8333	42.5	Rhodanus-Mündung (westliche)	103.583
22.8333	42.5	Rhodanus-Mündung (westliche)	22.75	42.6667	Fossae Marianae	88.8011
22.75	42.6667	Fossae Marianae	22.5	42.5	Setius	124.158
22.5	42.5	Setius	22.25	42.8333	Agatha	190.331
22.25	42.8333	Agatha	22	42.8333	Arauris-Mündung	91.6668
22	42.8333	Arauris-Mündung	21.75	42.75	Orobis-Mündung	100.748
21.75	42.75	Orobis-Mündung	21.5	42.75	Atax-Mündung	91.7903
21.5	42.75	Atax-Mündung	21.25	42.75	Ruscino-Mündung	91.7903
21.25	42.75	Ruscino-Mündung	21	42.6667	Illiberis-Mündung	100.861
21	42.6667	Illiberis-Mündung	20.3333	42.3333	Heiligtum der Venus	296.942
20.3333	42.3333	Heiligtum der Venus	19.5	42.5	Rhode	318.694
19.5	42.5	Rhode	19	42.5	Clodianus-Mündung	184.319
19	42.5	Clodianus-Mündung	18.75	42.3333	Emporiae	124.34
18.75	42.3333	Emporiae	18.5	42.1667	Sambroca-Mündung	124.522
18.5	42.1667	Sambroca-Mündung	18.25	42	Blanda	124.703
18.25	42	Blanda	18	41.75	Iluro	155.846
18	41.75	Iluro	18.5	41.5	Kap Lunarium	224.828
18.5	41.5	Kap Lunarium	17.8333	41.3333	Baetulo	263.497
17.8333	41.3333	Baetulo	17.5	41	Rubricatus-Mündung	208.613
17.5	41	Rubricatus-Mündung	17.25	41	Barcino	94.3387
17.25	41	Barcino	16.8333	40.75	Subur	201.097
16.8333	40.75	Subur	16.3333	40.6667	Tarraco*	194.036
16.3333	40.6667	Tarraco*	16	40.5	Iberus-Mündung	151.546
16	40.5	Iberus-Mündung	15.5	40	Tenebrius-Hafen	314.495
15.5	40	Tenebrius-Hafen	15.9167	39.6667	Kap Tenebrium	231.023
15.9167	39.6667	Kap Tenebrium	15.6667	39.5	Dianium	127.379
15.6667	39.5	Dianium	15	39	Turia-Mündung	359.347
15	39	Turia-Mündung	14.6667	38.9167	Pallantia-Mündung	136.134
14.6667	38.9167	Pallantia-Mündung	14	38.3333	Sucro-Mündung	391.004
14	38.3333	Sucro-Mündung	13.5	38.75	Ilicitanus-Hafen	285.723
13.5	38.75	Ilicitanus-Hafen	13	38.75	Saetabis-Mündung	194.971
13	38.75	Saetabis-Mündung	12.6667	38.5833	Alonis	154.528
12.6667	38.5833	Alonis	12.5	38.5	Tader-Mündung	77.3595
12.5	38.5	Tader-Mündung	12.9167	38.0833	Kap Scombraria	264.838
12.9167	38.0833	Kap Scombraria	12.25	37.9167	Carthago Nova*	275.572
12.25	37.9167	Carthago Nova*	12.1667	37.5	Lucentum	210.925
12.1667	37.5	Lucentum	12	37.3333	Urci	106.419
12	37.3333	Urci	12	37.25	Baetica (Ostende am Baliarischen Meer)	41.6667
12	37.25	Baetica (Ostende am Baliarischen Meer)	11.75	37.1667	Baria	107.923
11.75	37.1667	Baria	11.5	36.833	Kap des Charidemus	194.42
11.5	36.833	Kap des Charidemus	11.3333	37.0833	Portus Magnus	141.777
11.3333	37.0833	Portus Magnus	10.75	37.1667	Abdara	236.255
10.75	37.1667	Abdara	10.8333	37.0833	Landspitze	53.2897
10.8333	37.0833	Landspitze	10.25	37.25	Selambina	246.911
10.25	37.25	Selambina	9.75	37.25	Sexi	199
9.75	37.25	Sexi	9.25	37.25	Maenoba	199
9.25	37.25	Maenoba	8.83333	37.5	Malaca	207.447
8.83333	37.5	Malaca	8.5	37	Salduba-Mündung	283.02
8.5	37	Salduba-Mündung	8	36.917	Suel	204.033
8	36.917	Suel	7.66667	36.6667	Barbesula-Mündung	182.977
7.66667	36.6667	Barbesula-Mündung	7.5	36.25	Calpe	218.849
7.5	36.25	Calpe	7.5	36.1667	Carteia	41.6667
7.5	36.1667	Carteia	7.25	36.1667	Barbesula	100.913
7.25	36.1667	Barbesula	6.66667	36.3333	Iulia Traducta	249.538
6.66667	36.3333	Iulia Traducta	6.5	36.5	Mellaria	106.965
6.5	36.5	Mellaria	6.25	36.6667	Baelo	130.458
6.25	36.6667	Baelo	6.16667	36.1667	Baelo-Mündung	252.238
6.16667	36.1667	Baelo-Mündung	5.75	36	Hera-Tempel	187.861
5.75	36	Hera-Tempel	6	36.3333	Menestheus-Hafen	194.836
6	36.3333	Menestheus-Hafen	6	36.75	Ästuar bei Asta	208.333
6	36.75	Ästuar bei Asta	5.33333	37	Baetis-Mündung (östliche)	294.493
5.33333	37	Baetis-Mündung (östliche)	5.08333	37.1667	Baetis-Mündung (westliche)	129.956
5.08333	37.1667	Baetis-Mündung (westliche)	4.66667	37.3333	Onoba Ästuaria	185.594
4.66667	37.3333	Onoba Ästuaria	4.33333	37.5	Anas-Mündung (östliche)	156.419
4.33333	37.5	Anas-Mündung (östliche)	4.08333	37.6667	Anas-Mündung (westliche)	129.449
4.08333	37.6667	Anas-Mündung (westliche)	3.66667	37.75	Balsa	170.005
3.66667	37.75	Balsa	3	37.8333	Ossonoba	266.689
3	37.8333	Ossonoba	2.5	38.25	Heiliges Kap	286.65
2.5	38.25	Heiliges Kap	5	39	Callipus-Mündung	1046.04
5	39	Callipus-Mündung	5.08333	39.4167	Salacia	210.82
5.08333	39.4167	Salacia	4.41667	39.5	Caetobriga	260.713
4.41667	39.5	Caetobriga	4.25	39.75	Kap Barbarium	140.516
4.25	39.75	Kap Barbarium	5.16667	40.25	Olisipo	431.011
5.16667	40.25	Olisipo	5.5	40.1667	Tagus-Mündung	133.93
5.5	40.1667	Tagus-Mündung	5	40.6667	Berg der Selene	314.209
5	40.6667	Berg der Selene	5.16667	40.8333	Munda-Mündung	104.546
5.16667	40.8333	Munda-Mündung	5.16667	41.3333	Vacua-Mündung	250
5.16667	41.3333	Vacua-Mündung	5.33333	41.8333	Durius-Mündung	257.653
5.33333	41.8333	Durius-Mündung	5.5	42.25	Avus-Mündung	217.331
5.5	42.25	Avus-Mündung	5.167	42.5	Kap Avarum	175.369
5.167	42.5	Kap Avarum	5.66667	42.75	Nebis-Mündung	222.3
5.66667	42.75	Nebis-Mündung	5.5	43.25	Limia-Mündung	257.321
5.5	43.25	Limia-Mündung	5.33333	43.6667	Minius-Mündung	216.937
5.33333	43.6667	Minius-Mündung	5.5	44	Kap Orvium	177.176
5.5	44	Kap Orvium	5.66667	44.3333	Ulla-Mündung	177.062
5.66667	44.3333	Ulla-Mündung	5.66667	44.6667	Tamaris-Mündung	166.667
5.66667	44.6667	Tamaris-Mündung	5.33333	45	Hafen der Artabrer	204.322
5.33333	45	Hafen der Artabrer	5.25	45.1667	Kap Nerium	88.374
5.25	45.1667	Kap Nerium	5.66667	45.5	Altäre des Sestius	221.87
5.66667	45.5	Altäre des Sestius	6.25	45.5	Vir-Mündung	204.431
6.25	45.5	Vir-Mündung	6.5	45.5	Nächstes Kap	87.6136
6.5	45.5	Nächstes Kap	7.25	45	Flavium Brigantium	363.589
7.25	45	Flavium Brigantium	8.25	45.8333	Kap Lapatia Coru	544.778
8.25	45.8333	Kap Lapatia Coru	9	45.75	Mearus-Mündung	264.774
9	45.75	Mearus-Mündung	10.3333	45.6667	Nabius-Mündung	467.396
10.3333	45.6667	Nabius-Mündung	11.3333	45.75	Navia-Mündung	351.631
11.3333	45.75	Navia-Mündung	11.75	45.4167	Flavionavia	221.443
11.75	45.4167	Flavionavia	12	45.5	Naelo	97.0753
12	45.5	Naelo	13	45.6667	Noega Ucesia	359.719
13	45.6667	Noega Ucesia	13.1667	44.6667	Nerva-Mündung	503.44
13.1667	44.6667	Nerva-Mündung	13.5	44.25	Flaviobriga	239.904
13.5	44.25	Flaviobriga	13.75	44.4167	Deva-Mündung	122.224
13.75	44.4167	Deva-Mündung	14.3333	45	Menosca	357.821
14.3333	45	Menosca	15.1667	45.0833	Oiarso	297.346
15.1667	45.0833	Oiarso	15	45.8333	Kap Oiarso	379.528
15	45.8333	Kap Oiarso	16.75	44.75	Aturus-Mündung	819.913
16.75	44.75	Aturus-Mündung	17	45.3333	Sigmatis-Mündung	304.746
17	45.3333	Sigmatis-Mündung	16.5	46	Kap Curianum	376.341
16.5	46	Kap Curianum	17.5	46.5	Garumna-Mündung	426.665
17.5	46.5	Garumna-Mündung	16.5	46.75	Kap der Santonen	365.426
16.5	46.75	Kap der Santonen	17.25	47.75	Carantonus-Mündung	561.06
17.25	47.75	Carantonus-Mündung	17	48	Kap Pictonium	150.515
17	48	Kap Pictonium	17.5	48.25	Sicor-Hafen	208.501
17.5	48.25	Sicor-Hafen	17.6667	48.5	Liger-Mündung	136.708
17.6667	48.5	Liger-Mündung	17.6667	48.75	Brivates-Hafen	125
17.6667	48.75	Brivates-Hafen	17	49.25	Herius-Mündung	332.147
17	49.25	Herius-Mündung	16.5	49.6667	Vidana-Hafen	264.213
16.5	49.6667	Vidana-Hafen	15.25	49.75	Kap Gabaeum	406.312
15.25	49.75	Kap Gabaeum	16.5	50.25	Saliocanus-Hafen	473.168
16.5	50.25	Saliocanus-Hafen	17.3333	50.3333	Titus-Mündung	269.44
17.3333	50.3333	Titus-Mündung	18.8333	50.3333	Cruciatonnum	478.732
18.8333	50.3333	Cruciatonnum	18.75	51	Olina-Mündung	334.378
18.75	51	Olina-Mündung	19.5	51.1667	Noviomagus	249.875
19.5	51.1667	Noviomagus	20	51.5	Sequana-Mündung	228.418
20	51.5	Sequana-Mündung	21.75	52.3333	Frudis-Mündung	681.799
21.75	52.3333	Frudis-Mündung	22	53.5	Kap Itium	588.182
22	53.5	Kap Itium	22.75	53.5	Gerosiacum*	223.058
22.75	53.5	Gerosiacum*	24.5	53.5	Mosa-Mündung	520.457
24.5	53.5	Mosa-Mündung	26.5	53.3333	Lugdunum	601.768
26.5	53.3333	Lugdunum	26.75	53.3333	Rhenus-Mündung (westliche)	74.6448
26.75	53.3333	Rhenus-Mündung (westliche)
